# Supplementary material for: Recyclable glucose-derived palladium(0) nanoparticles as in situ-formed catalysts for cross-coupling reactions in aqueous media
Source: Royal Society of Chemistry journal article supplement (doi:10.1039/c5ra25712c), 2016-01-01
Supplement: c5ra25712c1.pdf [file c5ra25712c1.pdf]

# **Recyclable Glucose-Derived Palladium(0) Nanoparticles as in situ-Formed Catalysts for Cross-Coupling Reactions in Aqueous Media**

Jason E. Camp,\* Jay J. Dunsford, Oliver S. G. Dacosta, Rebecca K. Blundell, James Adams, Joshua Britton, Robert J. Smith, Thomas W. Bousford and Michael W. Fay

Department of Chemical Sciences, University of Huddersfield, Huddersfield, HD1 3DH

j.e.camp@hud.ac.uk

## **Supporting Information**

### **Contents**

|              |                                                                     |            |
|--------------|---------------------------------------------------------------------|------------|
| <b>I.</b>    | <b>General experimental information .....</b>                       | <b>S2</b>  |
| <b>II.</b>   | <b>Instrumentation .....</b>                                        | <b>S2</b>  |
| <b>III.</b>  | <b>Palladium nanoparticle formation and characterization .....</b>  | <b>S3</b>  |
| <b>1a.</b>   | <b>Synthesis of sugar-derived palladium(0) nanoparticles .....</b>  | <b>S3</b>  |
| <b>1b.</b>   | <b>Solid state analysis of palladium(0) nanoparticles .....</b>     | <b>S3</b>  |
| <b>1c.</b>   | <b>Solution state analysis of palladium(0) nanoparticles .....</b>  | <b>S6</b>  |
| <b>IV.</b>   | <b>Preparation of styrene derivatives 3 .....</b>                   | <b>S8</b>  |
| <b>V.</b>    | <b>Preparation of acetylene derivatives 6 .....</b>                 | <b>S10</b> |
| <b>VI.</b>   | <b>Preparation of biphenyl derivatives 7 and Boscalid (8) .....</b> | <b>S11</b> |
| <b>VII.</b>  | <b>Molar Efficiency Calculations.....</b>                           | <b>S13</b> |
| <b>VIII.</b> | <b>Reaction Optimization and Substrate Scope Studies.....</b>       | <b>S13</b> |
| <b>VIV.</b>  | <b>References .....</b>                                             | <b>S15</b> |
| <b>X.</b>    | <b><sup>1</sup>H and <sup>13</sup>C NMR .....</b>                   | <b>S16</b> |

## I. General Experimental Information

Unless otherwise indicated, all commercially available reagents and solvents were used directly from the supplier without further purification. Solvents used for column chromatography were of technical grade. For purification procedures using column chromatography, silica gel (60-120) mesh was used. Thin layer chromatography was carried out using Merck Kieselgel silica gel 60 F254 plates (0.2 mm) and visualization was achieved using UV light followed by dipping in a potassium permanganate solution and heating. All reactions were performed in Biotage 5 mL microwave vials with Teflon coated caps.

## II. Instrumentation

**Melting Point** – The melting points were recorded on a Stuart Scientific SMP3 melting point apparatus and are uncorrected.

**NMR** –  $^1\text{H}$  NMR and  $^{13}\text{C}$  NMR were recorded on a Bruker AV400 (400 MHz) spectrometer, Bruker AV(III)400 (400 MHz) spectrometer, Bruker DPX400 (400 MHz) spectrometer or JOEL EX270 (270 MHz) spectrometer at ambient temperature using  $\text{CDCl}_3$  (7.26 ppm),  $\text{DMSO}-d_6$  (2.50 ppm),  $(\text{CD}_3)_2\text{CO}$  (2.05 ppm) or  $\text{CD}_3\text{OD}$  (3.31 ppm) as the solvent. Chemical shift values are expressed as parts per million (ppm) and  $J$  values are in Hertz. Splitting patterns are indicated as s: singlet, d: doublet, t: triplet, q: quartet or combination thereof, br.s broad singlet or m: multiplet.

**FTIR** – Solution IR spectra were recorded on a Perkin Elmer 1600 series FTIR-spectrophotometer.

**Mass Spectrometry** – Mass spectra were determined using a Bruker MicroTOF mass spectrometer.

**pH meter** – The pH measurements were recorded on a Philip Harris digital pH meter using a pH = 7 standard buffer.

**Transmission Electron Microscopy (TEM)** – TEM analysis was performed using a JEOL2100F field-emission gun microscope operating at 200 kV and equipped with a Gatan Orius camera. The Pd(0) nanoparticles were dispersed in water using an ultrasound bath and a suspension (3.5  $\mu\text{L}$ ) was deposited onto a holey carbon grid (Agar Scientific), which had previously been exposed to a low temperature  $\text{O}_2/\text{Ar}$  plasma for five seconds in a Fischione Model 1020 Plasma Cleaner to make them hydrophilic. TEM image simulations was carried out using spherical aberration coefficient ( $C_s$ ) = 1 mm. TEM-EDS was performed in scanning TEM mode using a prototype Oxford Instruments XMAX 100 TLE, on loan from Oxford Instruments.

**Nanoparticle Tracking Analysis (NTA)** – NTA was performed with a Nanosight LM10-HS instrument equipped with an electron multiplication charge coupled device camera mounted on an optical microscope system to track light scattered by particles that are present in a focused (80  $\mu\text{m}$ ) beam generated by a single mode laser diode with a 60 mW blue laser illumination (405 nm). The solution containing the palladium(0) nanoparticles in a concentration of between  $10^7$  and  $10^9$  particles/mL was injected in a sample chamber of 0.5 mL size from which a volume of 120x80x20 microns was visualized under the microscope. The sample concentration was adjusted to ensure statistically significant number of particles under analysis. The Brownian motion of the nanoparticles was tracked at 30 frames/s. NTA 2.2 software was used to evaluate the mean square displacements of each visible particle (calibration 166 nm/pixel) and from the Stokes-Einstein equation the particle sizes were determined. All experiments were performed without filtering to ensure measurement of all particles.<sup>1</sup>

**Dynamic Light Scattering (DLS)** – DLS experiments were performed on a Malvern Zetasizer ZS equipped with a He-Ne (633 nm, 5 mW) laser and an Avalanche photodiode detector at an angle of 173°. All DLS data were processed using a Dispersion Technology Software (Malvern Instruments). All experiments were performed without filtering to ensure measurement of all particles.<sup>2</sup>

**X-ray Photoelectron Spectroscopy (XPS)** – XPS spectra were recorded on the Kratos AXIS ULTRA with a monochromated Al  $K\alpha$  X-ray source (1486.6 eV) operated at 15 mA emission current and 12 kV anode potential – 180 W. Hybrid (magnet/electrostatic) optics (300 x 700  $\mu\text{m}$  aperture), hemispherical analyzer, multichannel plate and delay line detector (DLD) with a take-off angle of 90° and an acceptance angle of 30°. All scans were acquired under charge neutralization conditions using a low energy electron gun within the field of magnetic lens. Survey scans were taken with a pass energy of 80 eV and high resolution scans with a pass energy of 20 eV. Data analysis is carried out using CASAXPS software with Kratos sensitivity factors to determine atomic % values from the peak areas.

**Scanning Ion Occlusion Sensing (SIOS)** – SIOS measurements were carried out on a qNano instrument (Izon Science Ltd., Christchurch, NZ). A standard electrolyte buffer (SEB) of 0.1 M KCl, 10 mM Tris buffer, 0.01% Triton X-100, and 3 mM EDTA, pH 8.0, filtered through a 0.22  $\mu\text{m}$  filter was used in all experiments. The membrane was wetted prior to sampling by applying a voltage (typically 0.3 V) and manually stretching the pore open (typically with a jaw stretch of 5 mm). Once a stable background current achieved, the fluid in the top half of the cell was replaced with a solution of the palladium(0) nanoparticles in the SEB (30–70  $\mu\text{L}$ ). The magnitude and duration of changes in the current signal were collected at a sampling frequency of 50 kHz. The instrument was calibrated using a solution of polystyrene particles (3000 series, 100 nm) in SEB.<sup>3</sup>

### III. Palladium nanoparticle formation and characterization

#### 1a. Synthesis of sugar derived palladium(0) nanoparticles

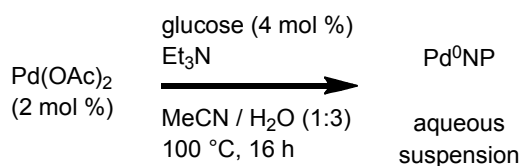

A stirred solution of Pd(OAc)<sub>2</sub> (10 mg, 0.044 mmol), glucose (16 mg, 0.088 mmol) and triethylamine (0.4 mL, 2.8 mmol) in acetonitrile / water (1:3, 4 mL) was heated to 100 °C for 16 h in a sealed vial. The mixture was cooled and centrifuged for 5 mins and the majority of solvent was removed. Water (2 mL) was added and the mixture was centrifuged for 5 mins and the majority of solvent was removed (repeated 2x). The particles were isolated as an aqueous suspension, which was directly used for nanoparticle characterization.

#### 1b. Solid state analysis of palladium(0) nanoparticles

Transmission Electron Microscopy (TEM), Energy-dispersive X-ray spectroscopy (EDX) and X-ray Photoelectron Spectroscopy (XPS) analysis were conducted on the sugar derived palladium(0) nanoparticles. An aqueous suspension of the nanoparticles was deposited on the requisite supports (see, Instrumentation section) for direct analysis of the solid samples. The results of the various techniques are discussed in Supplemental Figures 1-3.

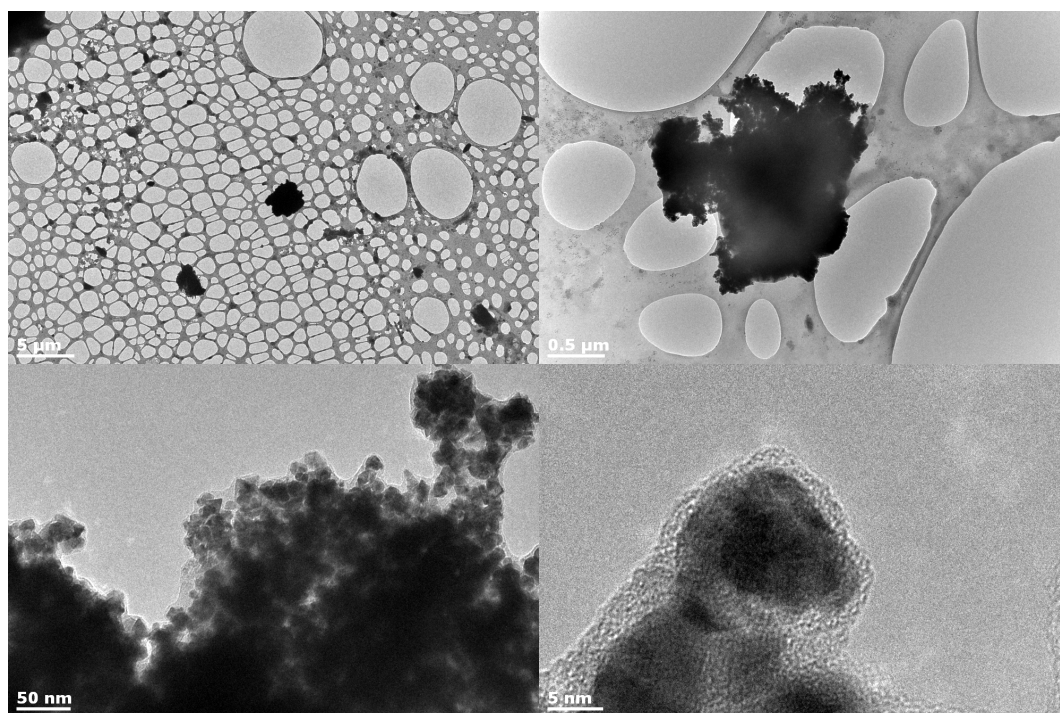

**Figure SF1a | Representative TEM images of sugar-derived palladium(0) nanoparticle.** The images show the aggregation of the nanoparticles as well as the stabilizing role of the sugar residues. High magnification imaging shows that individual nanoparticles are in the range of 5 – 20 nm and exist in a variety of different conformations and morphologies (spheres, prisms, etc.). The existence of crystalline planes indicates that some of the species are semi-crystalline. Importantly, the lighter amorphous materials at the periphery of the nanoparticles most likely contain the sugar residue.

EDS Layered Image 2

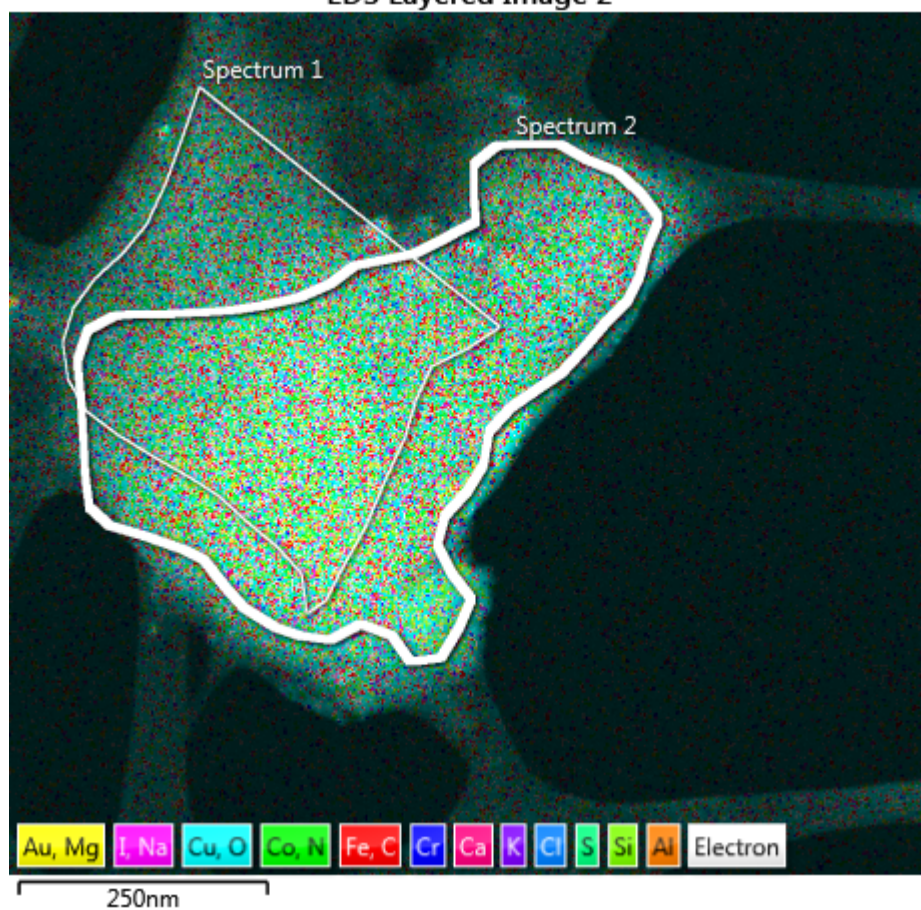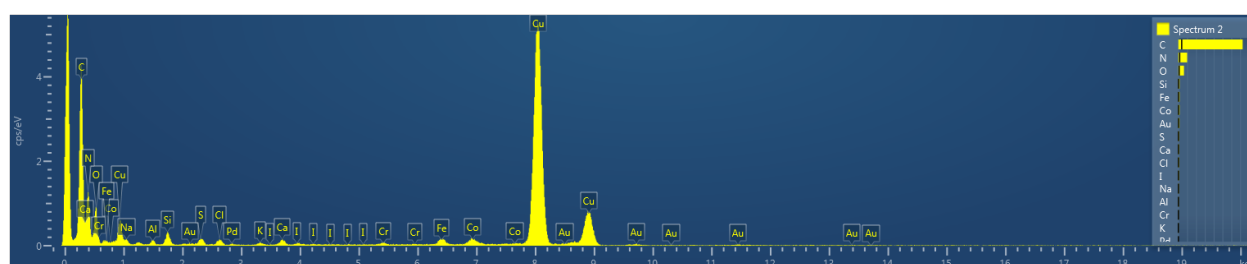

Spectrum 2 Wt% Wt% Sigma

|    |       |      |
|----|-------|------|
| C  | 72.81 | 3.78 |
| N  | 10.02 | 1.50 |
| O  | 6.42  | 0.98 |
| Na | 0.61  | 0.11 |
| Al | 0.52  | 0.09 |
| Si | 1.43  | 0.21 |
| S  | 0.85  | 0.13 |
| Cl | 0.79  | 0.12 |
| K  | 0.30  | 0.06 |
| Ca | 0.81  | 0.13 |
| Cr | 0.41  | 0.08 |
| Fe | 1.43  | 0.22 |
| Co | 1.41  | 0.22 |
| Pd | 0.24  | 0.13 |

|       |        |      |
|-------|--------|------|
| I     | 0.69   | 0.17 |
| Au    | 1.26   | 0.28 |
| Total | 100.00 |      |

**Figure SF1b | Representative EDS-TEM images of sugar-derived palladium(0) nanoparticle.** The image shows that the surface of the palladium nanoparticle has carbon and oxygen species on it. Importantly, the method is able to quantify the amount of carbon and oxygen on the surface. Copper has been deconvolved for the analysis, due to stray Cu signal from the supporting TEM grid. Cr, Fe and Co signals may also originate from the structure of the TEM itself.

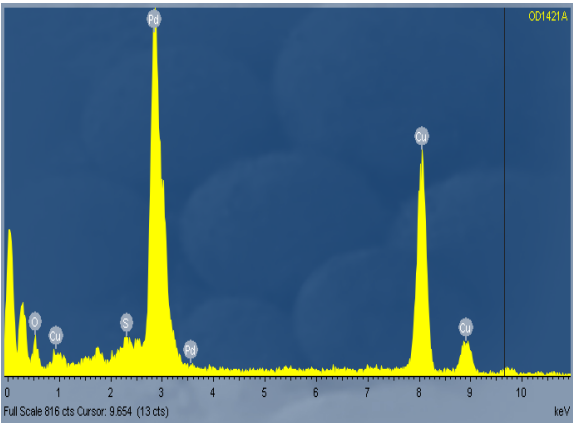

**Figure SF2 | EDX spectrum of sugar-derived palladium(0) nanoparticle.** The Energy-dispersive X-ray spectrum confirms the presence of palladium in the sample. The Cu signal is attributed to the use of a Cu mesh support grid.

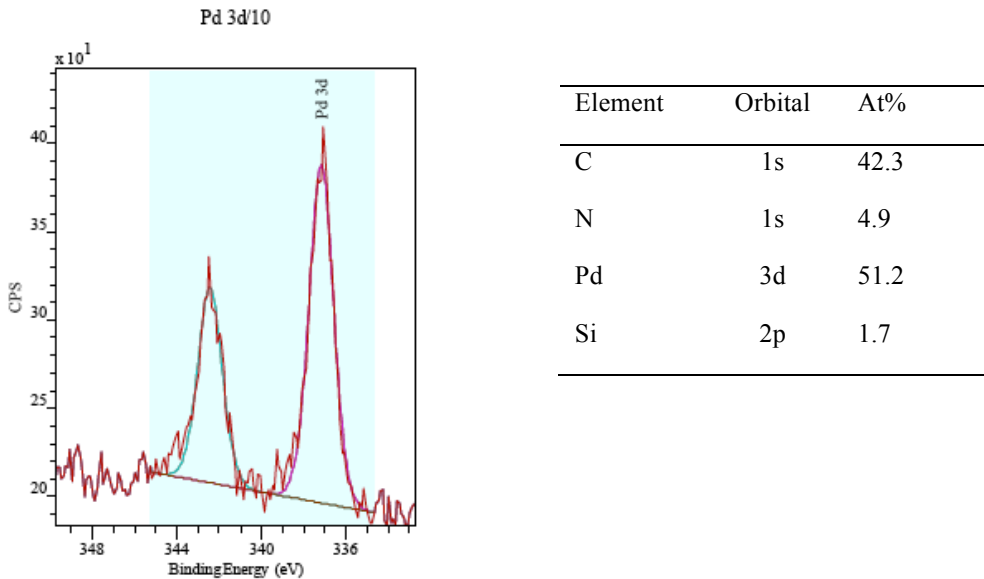

**Figure SF3 | XPS data of sugar-derived palladium(0) nanoparticle.** The X-ray photoelectron spectrum indicates that the palladium present in the sample is in the Pd(0) oxidation state.

### 1c. Solution state analysis of palladium(0) nanoparticles.

Analysis of the sugar-derived palladium(0) nanoparticles was carried out on solution phase samples in order to access the size the degree of aggregation of the nanoparticles in aqueous solutions. Thus, dynamic light scattering (DLS), Nanoparticle Tracking Analysis (NTA) and Scanning Ion Occlusion Sensing (SIOS) were conducted on suspensions of the nanoparticles as described in the instrumentation section. It should be noted that these three solution phase techniques differ significantly in the way that they determine the size of the nanoparticles in solution. DLS uses the changes in the intensity of scattered light caused by the Brownian motion of the particles to determine their size distribution through the use of the Stokes Einstein equation. A hard spherical model has been used for the calculations. In contrast, NTA directly observes each nanoparticle to give an indirect measure of the size of each particle that is tracked. Again, the Brownian motion of the particles was used to determine their size distribution through the use of the Stokes Einstein equation. Finally, SIOS detects and characterizes individual molecules by nanopore resistive pulse sensing. Importantly, the qNano instrument that was used in our study allows for the rapid tuning of the pore size to allow for improved signal. The results of the various techniques are discussed in Supplemental Figures 4-6.

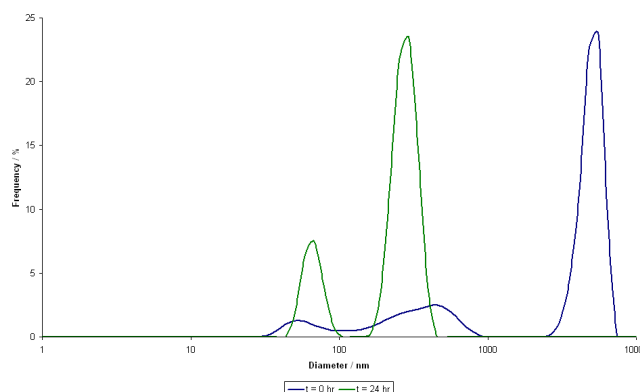

**Figure SF4 | DLS data of sugar-derived palladium(0) nanoparticle.** The dynamic light scattering spectrum suggests that numerous (semi-)stable particulate species are present in solution and that the nanoparticles aggregate in aqueous media. At  $t = 0$  h the suspension was trimodal with the following size distribution of:  $61.6 \pm 19.2$  nm,  $372.8 \pm 164.7$  nm,  $5032 \pm 836$  nm. After the suspension was allowed to stand for 24 h ( $t = 24$  h) the distribution was bimodal with the following size distribution:  $66.7 \pm 10.0$  nm,  $281.2 \pm 50.3$  nm, as the  $5 \mu\text{m}$  feature had precipitated from solution.

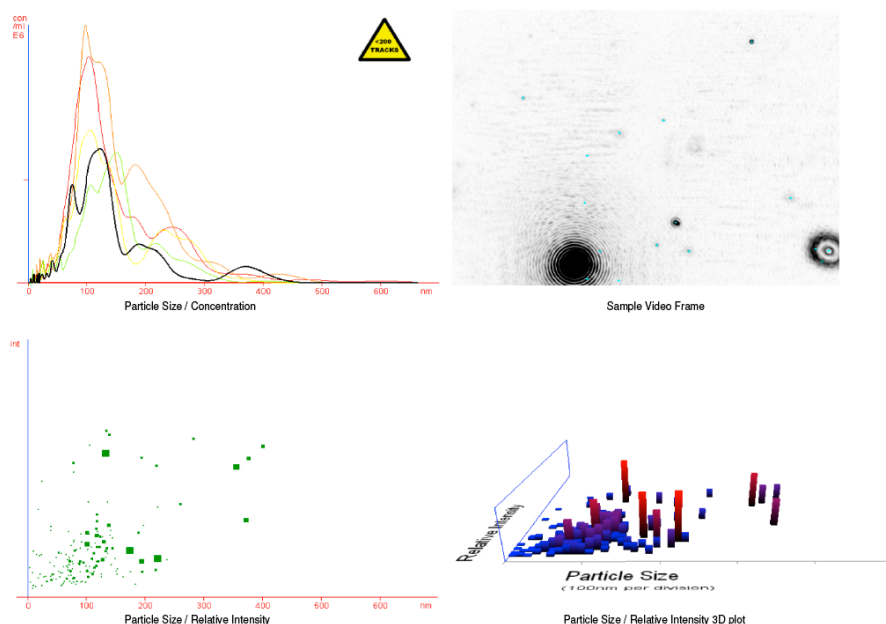

**Figure SF5 | NTA data of sugar-derived palladium(0) nanoparticle.** The nanoparticle tracking analysis data indicates that the aqueous suspension of nanoparticles aggregate with the following distribution: mean (151 nm), mode (122 nm) and SD (86 nm).

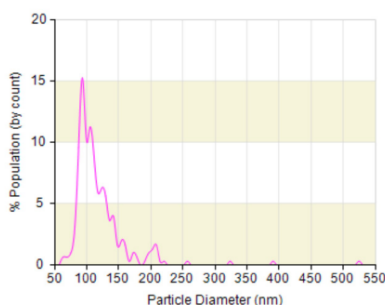

**Figure SF6 | SIOS data of sugar-derived palladium(0) nanoparticle.** The scanning ion occlusion sensing spectrum indicates that the nanoparticles aggregate in the SEB buffer. The mean (180 nm), median (75 nm) and mode (70 nm) of the filtered (1  $\mu$ M) suspension were calculated and suggest that the nanoparticles aggregate in the aqueous buffer

#### IV. Preparation of styrene derivatives 3

##### (*E*)-Methyl Cinnamate (3a)

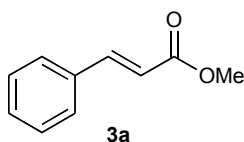

To a stirred solution of Pd(OAc)<sub>2</sub> (3.5 mg, 0.016 mmol) and glucose (5.0 mg, 0.032 mmol) in acetonitrile / water (1:3, 4 mL) at rt were added triethylamine (0.14 mL, 1.0 mmol), 4-iodobenzene (87  $\mu$ L, 0.78 mmol) and methyl acrylate (87  $\mu$ L, 0.97 mmol). The vial was sealed and the resultant mixture was heated at 100 °C for 16 h. The mixture was cooled to rt and water (10 mL) and dichloromethane (10 mL) were added. The combined organic extracts were dried over Na<sub>2</sub>SO<sub>4</sub> and the solvent was removed under reduced pressure. The crude residue was purified by flash column chromatography on silica gel (petrol / EtOAc, 15:1) to give (*E*)-methyl cinnamate (**3a**, 112 mg, 97 %) as a white solid. mp: 34–35 °C (lit.<sup>4</sup> 34–34.5); <sup>1</sup>H NMR (270 MHz, CDCl<sub>3</sub>)  $\delta$  7.69 (d, *J* = 16.0 Hz, 1H), 7.63–7.47 (m, 2H), 7.47–7.29 (m, 3H), 6.44 (d, *J* = 16.0 Hz, 1H), 3.80 (s, 3H); <sup>13</sup>C NMR (67.5 MHz, CDCl<sub>3</sub>)  $\delta$  167.6, 145.0, 134.5, 130.4, 129.0, 128.2, 117.9, 51.8; IR (CHCl<sub>3</sub>): 3021, 1712, 1604, 1497, 1455, 1361, 954 cm<sup>-1</sup>; HRMS (*m/z*): [M] calcd. for C<sub>10</sub>H<sub>10</sub>O<sub>2</sub>Na, 185.0578; found 185.0579.

##### (*E*)-3-Phenyl-2*E*-propenoic Acid (3b)

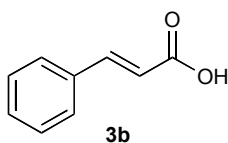

**Method 1:** To a stirred solution of Pd(OAc)<sub>2</sub> (3.5 mg, 0.016 mmol) and glucose (5.0 mg, 0.032 mmol) in acetonitrile / water (1:3, 4 mL) at rt were added triethylamine (0.14 mL, 1.0 mmol), iodobenzene (87  $\mu$ L, 0.78 mmol) and acrylic acid (66  $\mu$ L, 0.97 mmol). The vial was sealed and the resultant mixture was heated at 100 °C for 16 h. The mixture was cooled to rt and water (10 mL) and dichloromethane (10 mL) were added. The combined organic extracts were dried over Na<sub>2</sub>SO<sub>4</sub> and the solvent was removed under reduced pressure. The crude residue was washed with diethyl ether to give (*E*)-3-phenyl-2*E*-propenoic acid (**3b**, 115 mg, 100%) as white crystals.

**Method 2:** To a stirred solution of Pd(OAc)<sub>2</sub> (3.5 mg, 0.016 mmol) and sodium erythorbate (6.3 mg, 0.032 mmol) in acetonitrile / water (1:3, 4 mL) at rt were added triethylamine (0.14 mL, 1.0 mmol), iodobenzene (87  $\mu$ L, 0.78 mmol) and acrylic acid (66  $\mu$ L, 0.97 mmol). The vial was sealed and the resultant mixture was heated at 100 °C for 16 h. The mixture was cooled to rt and water (10 mL) and dichloromethane (10 mL) were added. The combined organic extracts were dried over Na<sub>2</sub>SO<sub>4</sub> and the solvent was removed under reduced pressure. The crude residue was washed with diethyl ether to give (*E*)-3-phenyl-2*E*-propenoic acid (**3b**, 100 mg, 87%) as white crystals.

mp: 132–133 °C (lit.<sup>5</sup> 133 °C); <sup>1</sup>H NMR (400 MHz, (CD<sub>3</sub>)<sub>2</sub>CO)  $\delta$  7.71–7.66 (m, 4H), 7.45–7.43 (m, 2H), 6.54 (d, *J* = 16.0 Hz, 1H); <sup>13</sup>C NMR (125 MHz, (CD<sub>3</sub>)<sub>2</sub>CO)  $\delta$  167.8, 135.5, 131.1, 129.8, 129.0, 119.3; IR (CHCl<sub>3</sub>): 3525, 3085, 3002, 1717, 1692, 1635, 1497, 1451, 1416, 1284, 981 cm<sup>-1</sup>; HRMS (*m/z*) [M] calcd. for C<sub>9</sub>H<sub>8</sub>O<sub>2</sub> Na, 171.0423; found, 171.0417.

### (*E*)-4-(2-Carboxyvinyl)benzoic Acid (**3c**)

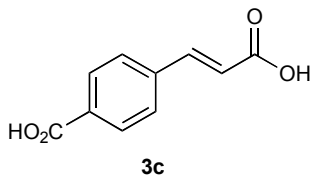

To a stirred solution of Pd(OAc)<sub>2</sub> (3.5 mg, 0.016 mmol) and glucose (5.0 mg, 0.032 mmol) in acetonitrile / water (1:3, 4 mL) at rt were added triethylamine (0.14 mL, 1.0 mmol), 4-iodobenzoic acid (193 mg, 0.78 mmol) and acrylic acid (66 μL, 0.97 mmol). The vial was sealed and the mixture heated at 100 °C for 16 h. The mixture was cooled to rt and water (10 mL) and dichloromethane (10 mL) were added. The combined organic extracts were dried over Na<sub>2</sub>SO<sub>4</sub> and the solvent was removed under reduced pressure to give (*E*)-4-(2-carboxyvinyl)benzoic acid (**3c**, 149 mg, 100%) as a white powder. mp: 353–355 °C (lit.<sup>6</sup> 352 °C); <sup>1</sup>H NMR (270 MHz, DMSO-D<sub>6</sub>): δ 7.95 (d, *J* = 8.3 Hz, 2H), 7.81 (d, *J* = 8.3 Hz, 2H), 7.64 (d, *J* = 16.1 Hz, 1H), 6.64 (d, *J* = 16.1 Hz, 1H); <sup>13</sup>C NMR (67.5 MHz, DMSO-D<sub>6</sub>): δ 167.3, 167.3, 143.1, 138.9, 132.4, 130.2, 128.8, 122.1; IR (CHCl<sub>3</sub>): 2361, 2342, 1602 cm<sup>-1</sup>; HRMS (*m/z*) [M] calcd. for C<sub>10</sub>H<sub>8</sub>O<sub>4</sub> Na, 215.0315; found, 215.0332.

### (*E*)-3-(2-Aminophenyl)acrylic Acid (**3d**)

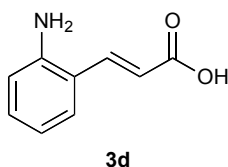

To a stirred solution of Pd(OAc)<sub>2</sub> (3.5 mg, 0.016 mmol) and glucose (5.0 mg, 0.032 mmol) in acetonitrile / water (1:3, 4 mL) at rt were added triethylamine (0.14 mL, 1.0 mmol), 2-iodoaniline (170 mg, 0.78 mmol) and acrylic acid (66 μL, 0.97 mmol). The vial was sealed and the mixture was heated at 100 °C for 16 h. The mixture was cooled to rt and water (10 mL) and dichloromethane (10 mL) were added. The combined organic extracts were dried over Na<sub>2</sub>SO<sub>4</sub> and the solvent was removed under reduced pressure. The crude residue was purified by flash column chromatography on silica gel (petrol / EtOAc, 9:1) to give (*E*)-3-(2-aminophenyl) acrylic acid (**3d**, 0.72 mmol, 118 mg, 93%) as a yellow solid. mp: 158–159 °C (lit.<sup>7</sup> 157–158 °C); <sup>1</sup>H NMR (270 MHz, CDCl<sub>3</sub>): δ 7.93 (d, *J* = 15.8 Hz, 1H), 7.43 (dd, *J* = 8.0, 1.2 Hz, 1H), 6.80 (t, *J* = 6.8 Hz, 2H), 6.73 (dd, *J* = 8.0, 1.2 Hz, 1H), 6.39 (d, *J* = 15.8 Hz, 1H); <sup>13</sup>C NMR (67.5 MHz, CD<sub>3</sub>OD): δ 171.2, 148.6, 142.5, 132.5, 128.6, 120.8, 119.3, 118.2, 117.9; IR (CHCl<sub>3</sub>): 2927, 2856, 2364, 2339, 1717, 1687, 1621, 1491, 1460, 1253, 1161, 1126, 982 cm<sup>-1</sup>; HRMS (*m/z*) [M] calcd. for C<sub>9</sub>H<sub>10</sub>NO<sub>2</sub>, 164.0706; found, 164.0713.

### (*E*)-stilbene (**3e**)

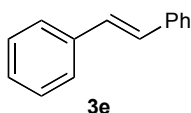

To a stirred solution of Pd(OAc)<sub>2</sub> (3.5 mg, 0.016 mmol) and glucose (5.0 mg, 0.032 mmol) in acetonitrile / water (1:3, 4 mL) at rt were added triethylamine (0.14 mL, 1.0 mmol), styrene (111 μL, 0.97 mmol) and iodobenzene (87 μL, 0.78 mmol). The vial was sealed and the mixture was heated to 100 °C for 16 h. The mixture was cooled and water (10 mL) and ether (10 mL) were added. The combined organic extracts were dried over Na<sub>2</sub>SO<sub>4</sub> and the solvent was removed under reduced pressure. The crude residue was purified by flash column chromatography on silica gel (petrol / EtOAc, 9:1) to give (*E*)-stilbene (**3e**, 126 mg, 90%) as a white crystalline solid. mp: 122–124 °C (lit.<sup>8</sup> 121–122 °C); <sup>1</sup>H NMR (270 MHz, CDCl<sub>3</sub>): δ 7.53 (d, *J* = 7.2 Hz, 4H), 7.37 (t, *J* = 7.2 Hz, 4H), 7.27 (t, *J* = 7.2 Hz, 2H), 7.13 (s, 2H); <sup>13</sup>C NMR; (67.5 MHz, CDCl<sub>3</sub>) δ 137.3, 128.7, 127.6, 126.5; IR (CHCl<sub>3</sub>): 3011, 1609, 1452, 961, 527 cm<sup>-1</sup>; HRMS (*m/z*) [M] calcd. for C<sub>14</sub>H<sub>12</sub>, 180.0939; found 180.0939.

### (*E*)-4-Nitrostilbene (**3f**)

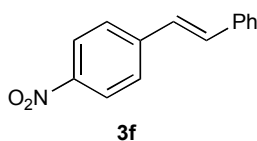

To a stirred solution of Pd(OAc)<sub>2</sub> (3.5 mg, 0.016 mmol) and glucose (5.0 mg, 0.032 mmol) in acetonitrile / water (1:3, 4 mL) at rt were added triethylamine (0.14 mL, 1.0 mmol), styrene (87  $\mu$ L 0.78 mmol) and 4-iodonitrobenzene (193 mg, 0.78 mmol). The vial was sealed and the mixture was heated to 100 °C for 16 h. The mixture was cooled and water (10 mL) and ether (10 mL) were added. The combined organic extracts were dried over Na<sub>2</sub>SO<sub>4</sub> and the solvent was removed under reduced pressure. The crude residue was purified by flash column chromatography on silica gel (petrol / EtOAc, 30:1) to give (*E*)-4-nitrostilbene (**3f**, 175 mg, 94%) as a yellow solid. mp: 153–154 °C (lit.<sup>9</sup> 153–154 °C); <sup>1</sup>H NMR (400 MHz, CDCl<sub>3</sub>):  $\delta$  8.23 (d, *J* = 12.0 Hz, 2H), 7.65 (d, 8.9 Hz, 2H), 7.58–7.55 (m, 2H), 7.43–7.31 (m, 4H), 7.18–7.14 (m, 1H); <sup>13</sup>C NMR (67.5 MHz, CDCl<sub>3</sub>):  $\delta$  146.7, 143.8, 136.2, 133.3, 128.9, 128.8, 127.0, 126.8, 126.2, 124.1; IR (CHCl<sub>3</sub>): 1594, 1518, 1343, 1111, 966, 955, 851 cm<sup>-1</sup>; HRMS (*m/z*) [*M*] calcd. for C<sub>14</sub>H<sub>11</sub>NO<sub>2</sub>, 225.0790; found 225.0784.

#### Ethyl (*E*)-3-(4-cyanophenyl)acrylate (**3g**)

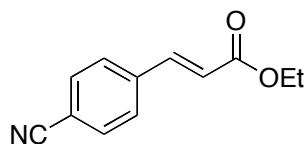

**3g**

To a stirred solution of Pd(OAc)<sub>2</sub> (3.5 mg, 0.016 mmol) and glucose (5.0 mg, 0.032 mmol) in acetonitrile / water (1:3, 4 mL) at rt were added triethylamine (0.14 mL, 1.0 mmol), 4-iodobenzonitrile (178 mg, 0.78 mmol) and ethyl acrylate (106  $\mu$ L, 0.97 mmol). The vial was then sealed and the mixture heated at 100 °C for 16 h. The mixture was cooled and water (10 mL) and CH<sub>2</sub>Cl<sub>2</sub> (10 mL) were added. The combined organic extracts were dried over Na<sub>2</sub>SO<sub>4</sub> and the solvent was removed under reduced pressure. The crude residue was purified by flash column chromatography on silica gel (hexane / EtOAc, 9:1) to give ethyl (*E*)-3-(4-cyanophenyl)acrylate (**3g**, 37 mg, 23%) as a white solid. <sup>1</sup>H NMR (400 MHz, CDCl<sub>3</sub>):  $\delta$  7.69 – 7.59 (m, 5H), 6.51 (d, *J* = 16.0 Hz, 1H), 4.28 (q, *J* = 7.0, 7.19 Hz, 2H), 1.34 (t, *J* = 7.2 Hz, 3H); <sup>13</sup>C NMR (400MHz, CDCl<sub>3</sub>):  $\delta$  166.1, 142.1, 138.8, 132.7, 128.4, 121.9, 118.4, 113.3, 61.0, 14.3; IR (neat): 2989, 2921, 2226, 1705, 1637 cm<sup>-1</sup>. HRMS (*m/z*) [*M*+H]<sup>+</sup> calcd. for C<sub>12</sub>H<sub>12</sub>NO<sub>2</sub>, 202.0863; found, 202.0861.

#### Ethyl (*E*)-3-(4-formylphenyl)acrylate (**3h**)

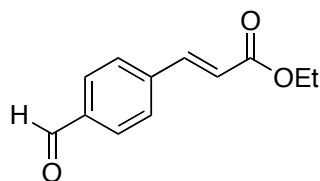

**3h**

To a stirred solution of Pd(OAc)<sub>2</sub> (2.47 mg, 0.011 mmol) and glucose (3.96 mg, 0.022 mmol) in acetonitrile / water (1:3, 2.86 mL) at rt were added triethylamine (0.10 mL, 0.72 mmol), 4-iodobenzaldehyde (130 mg, 0.56 mmol) and ethyl acrylate (76  $\mu$ L, 0.70 mmol). The vial was then sealed and the mixture heated at 100 °C for 16 h. The mixture was cooled and water (10 mL) and CH<sub>2</sub>Cl<sub>2</sub> (10 mL) were added. The combined organic extracts were dried over Na<sub>2</sub>SO<sub>4</sub> and the solvent was removed under reduced pressure. The crude residue was purified by flash column chromatography on silica gel (hexane / EtOAc, 9:1) to give ethyl (*E*)-3-(4-formylphenyl)acrylate (**3h**, 75 mg, 47%) as a white solid. <sup>1</sup>H NMR (400 MHz, CDCl<sub>3</sub>):  $\delta$  10.01 (s, 1H), 7.89 (d, *J* = 8.12 Hz, 2H), 7.68 (m, 3H), 6.54 (d, *J* = 16.0 Hz, 1H), 4.27 (q, *J* = 7.1, 7.2 Hz, 2H), 1.33 (t, *J* = 7.1 Hz, 3H); <sup>13</sup>C NMR (400MHz, CDCl<sub>3</sub>):  $\delta$  191.5, 166.4, 142.8, 140.1, 137.1, 130.2, 128.5, 121.5, 60.8, 14.3; IR (neat): 2980, 2847, 1693, 1633, 1602 cm<sup>-1</sup>. HRMS (*m/z*) [*M*+H]<sup>+</sup> calcd. for C<sub>12</sub>H<sub>13</sub>O<sub>3</sub>, 205.0859; found, 205.0862.

#### (*E*)-4-styrylbenzonitrile (**3i**)

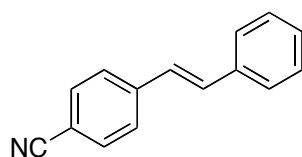

**3i**

To a stirred solution of Pd(OAc)<sub>2</sub> (3.5 mg, 0.016 mmol) and glucose (5.0 mg, 0.032 mmol) in acetonitrile / water (1:3, 4 mL) at rt were added triethylamine (0.14 mL, 1.0 mmol), 4-iodobenzonitrile (178 mg, 0.78 mmol) and styrene (112  $\mu$ L,

0.97 mmol). The vial was then sealed and the mixture heated at 100 °C for 16 h. The mixture was cooled and water (10 mL) and CH<sub>2</sub>Cl<sub>2</sub> (10 mL) were added. The combined organic extracts were dried over Na<sub>2</sub>SO<sub>4</sub> and the solvent was removed under reduced pressure. The crude residue was purified by flash column chromatography on silica gel (hexane / EtOAc, 9:1) to give (*E*)-3-(2,6-dimethylphenyl)acrylic acid (**3i**, 58 mg, 36%) as a white solid. <sup>1</sup>H NMR (400 MHz, CDCl<sub>3</sub>): δ 7.62 (d, *J* = 8.4 Hz, 2H), 7.57 (d, *J* = 8.8 Hz, 2H), 7.54 (d, *J* = 7.5 Hz, 2H), 7.40 (t, *J* = 7.7 Hz, 2H), 7.33 (t, *J* = 7.3 Hz, 1H), 7.21 (d, *J* = 16.4 Hz, 1H), 7.08 (d, *J* = 16.4 Hz, 1H); <sup>13</sup>C NMR (400 MHz, CDCl<sub>3</sub>): δ 141.8, 136.3, 132.5, 132.4, 128.9, 128.7, 127.0, 126.9, 126.7, 119.1, 110.6; IR (neat): 3022, 2224, 1600 cm<sup>-1</sup>. HRMS (*m/z*) [*M*+H]<sup>+</sup> calcd. for C<sub>15</sub>H<sub>12</sub>N, 206.0964; found, 206.0973

## V. Preparation of acetylene derivatives 6

### Diphenyl Acetylene (6a)

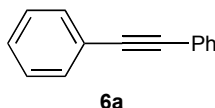

To a stirred solution of Pd(OAc)<sub>2</sub> (3.5 mg, 0.016 mmol) and glucose (5.0 mg, 0.032 mmol) in acetonitrile / water (1:3, 4 mL) at rt were added triethylamine (0.14 mL, 1.0 mmol), phenyl acetylene (85 μL, 0.78 mmol) and iodobenzene (87 μL, 0.777 mmol). The vial was sealed and the mixture was heated to 100 °C for 16 h. The mixture was cooled and water (10 mL) and ether (10 mL) were added. The combined organic extracts were dried over Na<sub>2</sub>SO<sub>4</sub> and the solvent was removed under reduced pressure. The crude residue was purified by flash column chromatography on silica gel (petrol / EtOAc, 9:1) to give diphenyl acetylene (**6a**, 130 mg, 95 %) as a brown solid. mp: 56–58 °C (lit.<sup>10</sup> 57 °C); <sup>1</sup>H NMR (270 MHz, CDCl<sub>3</sub>) δ 7.60–7.47 (m, 2H), 7.38–7.30 (m, 3H); <sup>13</sup>C NMR (67.5 MHz, CDCl<sub>3</sub>) δ 131.6, 128.4, 128.3, 123.3, 89.4; IR (CHCl<sub>3</sub>): 3071, 3004, 2922, 1599, 1494, 1432, 1073, 1033, 920 cm<sup>-1</sup>; HRMS (*m/z*) [*M*] calcd. for C<sub>14</sub>H<sub>10</sub>, 178.0783; found 178.0775.

### (*E*)-1-Nitro-4-(2-phenyl-1-ethynyl)benzene (6b)

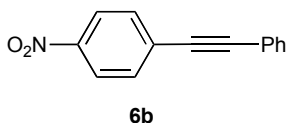

To a stirred solution of Pd(OAc)<sub>2</sub> (3.5 mg, 0.016 mmol) and glucose (5.0 mg, 0.032 mmol) in acetonitrile / water (1:3, 4 mL) at rt were added triethylamine (0.14 mL, 1.0 mmol), phenylacetylene (85 μL, 0.78 mmol) and 4-iodonitrobenzene (193 mg, 0.78 mmol). The vial was sealed and the mixture was heated to 100 °C for 16 h. The mixture was cooled and water (10 mL) and ether (10 mL) were added. The combined organic extracts were dried over Na<sub>2</sub>SO<sub>4</sub> and the solvent was removed under reduced pressure. The crude residue was purified by flash column chromatography on silica gel (petrol / EtOAc, 9:1) to give (*E*)-1-nitro-4-(2-phenyl-1-ethynyl)benzene (**6b**, 172 mg, 60%) as a yellow solid. mp: 119–121 °C (lit.<sup>11</sup> 119–121 °C); <sup>1</sup>H NMR (400 MHz, CD<sub>3</sub>OD): δ 8.28 (d, *J* = 8.0, 2H), 7.76 (d, *J* = 8.0, 2H), 7.60–7.58 (m, 2H), 7.45–7.42 (m, 3H); <sup>13</sup>C NMR (125 MHz, CD<sub>3</sub>OD): δ 147.1, 132.0, 131.4, 129.2, 129.0, 128.3, 123.3, 122.0, 93.7, 86.9; IR (CHCl<sub>3</sub>): 2219, 1597, 1520, 1345, 1107, 863; HRMS (*m/z*) [*M*] calcd. for C<sub>14</sub>H<sub>9</sub>NO<sub>2</sub>, 223.0633; found 223.0630.

### (*E*)-2-phenylethynylaniline (6c)

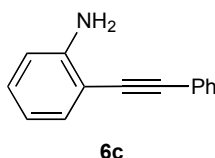

To a stirred solution of Pd(OAc)<sub>2</sub> (3.5 mg, 0.016 mmol) and glucose (5.0 mg, 0.032 mmol) in acetonitrile / water (1:3, 4 mL) at rt were added triethylamine (0.14 mL, 1.0 mmol), phenylacetylene (85 μL, 0.78 mmol) and 2-iodoaniline (170 mg, 0.78 mmol). The vial was sealed and the mixture was heated to 100 °C for 16 h. The mixture was cooled and water (10 mL) and ether (10 mL) were added. The combined organic extracts were dried over Na<sub>2</sub>SO<sub>4</sub> and the solvent was removed under reduced pressure. The crude residue was purified by flash column chromatography on silica gel (petrol / EtOAc, 30:1) to give (*E*)-2-phenylethynylaniline (**6c**, 64 mg, 44%) as a yellow solid. mp: 86–87 °C (lit.<sup>12</sup> 85–87 °C); <sup>1</sup>H NMR (270 MHz, CDCl<sub>3</sub>): δ 7.59–7.51 (m, 2H), 7.43–7.33 (m, 4H), 7.16 (td, *J* = 7.5, 1.5, 1H), 6.79–6.68 (m, 2H), 4.40 (br.s 2H); <sup>13</sup>C NMR (67.5 MHz, CDCl<sub>3</sub>): δ 147.8, 132.1, 131.4, 129.7, 128.3, 128.2, 123.3, 117.9, 114.3, 94.6, 85.8; IR (CHCl<sub>3</sub>): 2219, 1597, 1520, 1345, 1107, 863 cm<sup>-1</sup>; HRMS (*m/z*) [*M*] calcd. for C<sub>14</sub>H<sub>11</sub>N, 193.0892; found 193.0897

## VI. Preparation of biphenyl derivatives **7** and Boscalid (**8**)

### Biphenyl (**7a**)

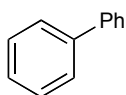

**7a**

*Method 1:* To a stirred solution of Pd(OAc)<sub>2</sub> (3.5 mg, 0.016 mmol) and glucose (14 mg, 0.077 mmol) in DMF / water (10:1, 4 mL) at rt were added caesium carbonate (510 mg, 1.55 mmol), iodobenzene (87  $\mu$ L, 0.78 mmol) and phenylboronic acid (140 mg, 1.17 mmol). The vial was sealed and the mixture was heated to 100 °C for 16 h. The mixture was cooled and water (10 mL) and ether (10 mL) were added. The combined organic extracts were dried over Na<sub>2</sub>SO<sub>4</sub> and the solvent was removed under reduced pressure. The crude residue was purified by flash column chromatography on silica gel (petrol / EtOAc, 30:1) to give biphenyl (**7a**, 120 mg, 98%) as a white crystalline solid.

*Method 2:* To a stirred solution of Pd(OAc)<sub>2</sub> (3.5 mg, 0.016 mmol) and glucose (14 mg, 0.077 mmol) in DMF / water (10:1, 4 mL) at rt were added caesium carbonate (510 mg, 1.55 mmol), bromobenzene (82  $\mu$ L, 0.78 mmol) and phenylboronic acid (140 mg, 1.17 mmol). The vial was sealed and the mixture was heated to 100 °C for 16 h. The mixture was cooled and water (10 mL) and ether (10 mL) were added. The combined organic extracts were dried over Na<sub>2</sub>SO<sub>4</sub> and the solvent was removed under reduced pressure. The crude residue was purified by flash column chromatography on silica gel (petrol / EtOAc, 30:1) to give biphenyl (**7a**, 120 mg, 98%) as a white crystalline solid.

mp: 70–72 °C (lit.<sup>13</sup> 70–72 °C); <sup>1</sup>H NMR (270 MHz, CDCl<sub>3</sub>):  $\delta$  7.75–7.67 (m, 4H), 7.61–7.50 (m, 4H), 7.50–7.41 (m, 2H); <sup>13</sup>C NMR (67.5 MHz, CDCl<sub>3</sub>): 141.2, 128.7, 127.2, 127.1; IR (CHCl<sub>3</sub>): 3066, 1597, 1485, 907 cm<sup>-1</sup>; HRMS (*m/z*) [M]<sup>+</sup> calcd. for C<sub>12</sub>H<sub>10</sub>, 154.0783; found 154.0772.

### 4-Nitrobiphenyl (**7b**)

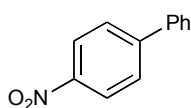

**7b**

To a stirred solution of Pd(OAc)<sub>2</sub> (3.5 mg, 0.016 mmol) and glucose (14 mg, 0.077 mmol) in DMF / water (10:1, 4 mL) at rt were added caesium carbonate (510 mg, 1.55 mmol), 1-iodo-4-nitrobenzene (190 mg, 0.78 mmol) and phenylboronic acid (140 mg, 1.17 mmol). The vial was sealed and the mixture was heated to 100 °C for 16 h. The mixture was cooled and water (10 mL) and ether (10 mL) were added. The combined organic extracts were dried over Na<sub>2</sub>SO<sub>4</sub> and the solvent was removed under reduced pressure. The crude residue was purified by flash column chromatography on silica gel (petrol / EtOAc, 15:1) to give 4-nitrobiphenyl (**7b**, 140 mg, 94%) as an orange crystalline solid. mp: 98–100 °C (lit.<sup>14</sup> 100–102 °C); <sup>1</sup>H NMR (400 MHz, CDCl<sub>3</sub>):  $\delta$  8.33 (d, *J* = 8.0 Hz, 2H), 7.77 (d, *J* = 8.0 Hz, 2H), 7.67–7.64 (m, 2H), 7.55–7.47 (m, 3H); <sup>13</sup>C NMR (125 MHz, CDCl<sub>3</sub>): 147.6, 138.8, 132.1, 129.1, 128.9, 127.8, 127.4, 124.1; IR (CHCl<sub>3</sub>): 3066, 1597, 1519, 1347, 855 cm<sup>-1</sup>; HRMS (*m/z*) [M] calcd. for C<sub>10</sub>H<sub>9</sub>N<sub>1</sub>O<sub>2</sub>, 200.0712; found 200.0710.

### Biphenyl-2-amine (**7c**)

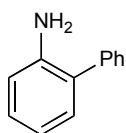

**7c**

To a stirred solution of Pd(OAc)<sub>2</sub> (3.5 mg, 0.016 mmol) and glucose (14 mg, 0.077 mmol) in DMF / water (10:1, 4 mL) at rt were added caesium carbonate (510 mg, 1.55 mmol), iodoaniline (170 mg, 0.78 mmol), phenylboronic acid (140 mg, 1.17 mmol). The vial was sealed and the mixture was heated to 100 °C for 16 h. The mixture was cooled and water (10 mL) and ether (10 mL) were added. The combined organic extracts were dried over Na<sub>2</sub>SO<sub>4</sub> and the solvent was removed under reduced pressure. The crude residue was purified by flash column chromatography on silica gel (petrol / EtOAc, 6:1) to give biphenyl-2-amine (**7c**, 66 mg, 65%) as a brown oil. <sup>1</sup>H NMR (270 MHz, CDCl<sub>3</sub>):  $\delta$  7.51–7.45 (m, 4H), 7.42–7.33 (m, 1H), 7.20–7.13 (m, 1H), 6.86–6.83 (m, 2H), 6.81 (s, 2H), 6.79 (d, 1H, *J* = 8.0 Hz); <sup>13</sup>C NMR (67.5

MHz, CDCl<sub>3</sub>):  $\delta$  148.7, 139.5, 130.4, 129.0, 128.8, 128.7, 127.2, 127.1, 118.6 115.5; IR (CHCl<sub>3</sub>): 3394, 3011, 1617, 1501, 1158 cm<sup>-1</sup>; HRMS (*m/z*) [M] calcd. for C<sub>12</sub>H<sub>12</sub>N<sub>1</sub>, 170.0970; found 170.0978.

#### 4-Chloro-biphenyl-2-amine (7d)<sup>15</sup>

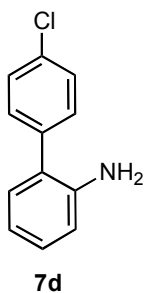

To a stirred solution of Pd(OAc)<sub>2</sub> (3.5 mg, 0.016 mmol) and glucose (14 mg, 0.077 mmol) in DMF / water (10:1, 4 mL) at rt were added caesium carbonate (510 mg, 1.55 mmol), iodoaniline (170 mg, 0.78 mmol) and 4-chloro-phenylboronic acid (180 mg, 1.17 mmol). The vial was sealed and the mixture was heated to 100 °C for 16 h. The mixture was cooled and water (10 mL) and ether (10 mL) were added. The combined organic extracts were dried over Na<sub>2</sub>SO<sub>4</sub> and the solvent was removed under reduced pressure. The crude residue was purified by flash column chromatography on silica gel (petrol / EtOAc, 8:1) to give 4-chloro-biphenyl-2-amine (**7d**, 130 mg, 88%) as a cream oil. <sup>1</sup>H NMR (270 MHz, CDCl<sub>3</sub>):  $\delta$  7.43–7.38 (m, 2H), 7.21–7.14 (m, 2H), 7.13–7.06 (m, 1H), 6.89–6.82 (m, 1H), 6.82–6.74 (m, 2H), 3.75 (s, 2H); <sup>13</sup>C NMR (67.9 MHz, CDCl<sub>3</sub>): 143.8, 133.5, 131.5, 130.9, 129.4, 129.3, 128.7, 126.8, 119.2, 116.2; IR (CHCl<sub>3</sub>) 1045, 1617, 1731, 2985, 3394 cm<sup>-1</sup>; HRMS (ESI) *m/z* Calcd for C<sub>12</sub>H<sub>11</sub>ClN, 204.0580. Found 204.0780.

#### 2-Chloro-*N*-(4'-chloro-[1,1'-biphenyl]-2-yl) Nicotinamide (**8**)

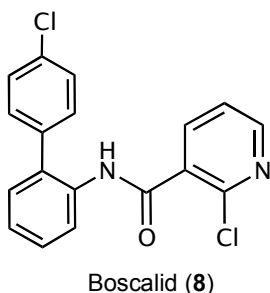

To a stirred solution of 4-chloro-biphenyl-2-amine (**7d**, 90 mg, 0.44 mmol) in dichloromethane (2.0 mL) at rt were added 2-chloronicotoyl chloride (80 mg, 0.45 mmol), triethylamine (0.12 mL, 0.88 mmol) and 4-dimethylaminopyridine (5 mg, 0.04 mmol). The resulting mixture was stirred at rt for 14 h. Dichloromethane (10 mL) and water (10 mL) were added. The combined organic extracts were dried over Na<sub>2</sub>SO<sub>4</sub> and the solvent was removed under reduced pressure. The crude residue was purified by flash column chromatography on silica gel (petrol / EtOAc, 6:1) to afford 2-chloro-*N*-(4'-chloro-[1,1'-biphenyl]-2-yl) nicotinamide (**8**, 104 mg, 81%) as a white solid. mp 138–140 °C (lit.<sup>15</sup> 142–144 °C); <sup>1</sup>H NMR (270 MHz, CDCl<sub>3</sub>)  $\delta$  8.37–8.34 (m, 1H), 8.23 (bs, 1H), 8.06–8.02 (m, 2H), 7.47–7.40 (m, 2H), 7.39–7.37 (m, 2H), 7.33–7.31 (m, 2H), 7.30–7.29 (m, 1H), 7.28–7.23 (m, 1H); <sup>13</sup>C NMR (67.9 MHz, CDCl<sub>3</sub>) 162.1, 150.6, 146.1, 139.0, 135.8, 133.77, 133.70, 132.0, 130.6, 130.2, 129.7, 128.7, 128.5, 128.3, 122.3, 121.9; IR (CHCl<sub>3</sub>) (cm<sup>-1</sup>) 1522, 1561, 1581, 1610, 1674, 3008, 3402; HRMS (ESI) *m/z* Calcd for C<sub>18</sub>H<sub>13</sub>N<sub>2</sub>Cl<sub>2</sub>O, 343.0405, found 343.0394.

## VI. Molecular Efficiency Calculations

Molar efficiency calculations were calculated using the method of Watson *et al.*<sup>16</sup> in which:

$$\text{molar efficiency (Mol. E\%)} = [\text{moles product} / \text{moles starting material} + \text{additives} + \text{catalysts} + \text{solvents}] \times 100$$

The Mol. E% was calculated for each step of the process and the total molar efficiency (molE<sub>total</sub>) is the multiplication of these values.

### Molar Efficiency Calculations

#### This work

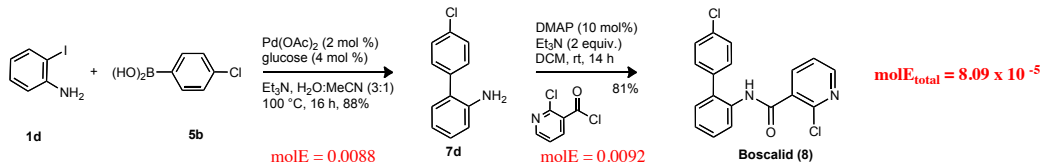

#### Kappe *et al.*<sup>17</sup>

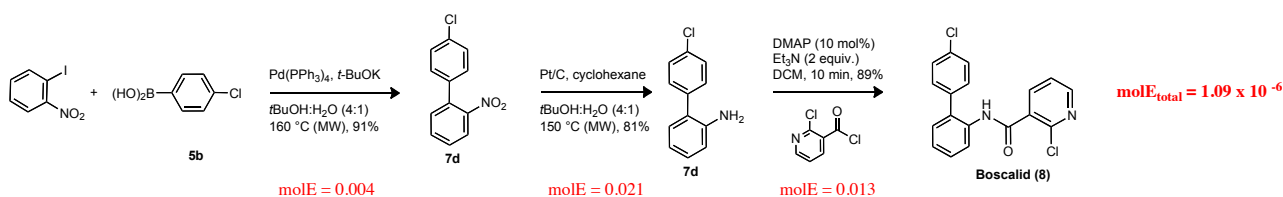

Thus, the approach presented in this report amounts to a nearly two-fold increase in molar efficiency.

## VIII. Reaction Optimization and Substrate Scope Studies

**Table S1.** Development of the sugar-derived PdNP-catalysed cross-coupling reaction, solvent effects and reaction times

| Entry | Solvent                      | Pd (mol %) | Glucose (mol %) | Et <sub>3</sub> N (equiv.) | Temp. (°C) | Time (h) | Yield <sup>b</sup> (%) |
|-------|------------------------------|------------|-----------------|----------------------------|------------|----------|------------------------|
| 1     | MeCN / Water (1:3)           | 2          | 4               | 1.3                        | 100        | 16       | 97                     |
| 2     | DMF                          | 2          | 4               | 1.3                        | 100        | 16       | 97                     |
| 3     | THF / H <sub>2</sub> O (1:3) | 2          | 4               | 1.3                        | 100        | 16       | 13                     |
| 4     | Water                        | 2          | 4               | 1.3                        | 100        | 16       | 4                      |
| 5     | MeCN / Water (1:3)           | 2          | 4               | 1.3                        | 100        | 0        | 0                      |
| 6     | MeCN / Water (1:3)           | 2          | 4               | 1.3                        | 100        | 1        | 22                     |
| 7     | MeCN / Water (1:3)           | 2          | 4               | 1.3                        | 100        | 5        | 30                     |
| 8     | MeCN / Water (1:3)           | 2          | 4               | 1.3                        | 100        | 8        | 58                     |

<sup>a</sup> Reaction conditions: 1-iodo-4-nitrobenzene (0.78 mmol, 1 equiv.), phenylboronic acid (1.16 mmol, 1.5 equiv.), base (1.56 mmol, 2 equiv.). <sup>b</sup> Isolated yields. <sup>c</sup> A dichloromethane stock solution was employed to load the Pd(OAc)<sub>2</sub> catalyst, with the dichloromethane removed *in vacuo* prior to the addition of other substrates.

**Table S2.** Development of the sugar-derived PdNP-catalysed cross-coupling reactions and substrate evaluation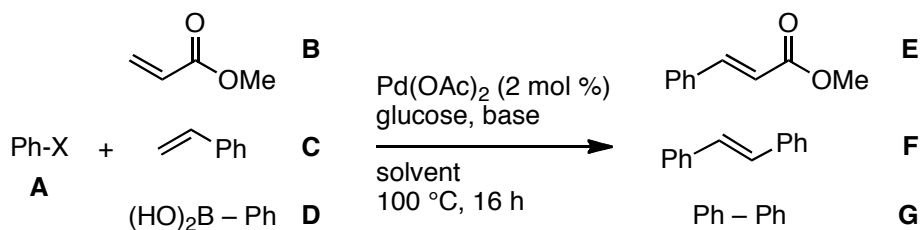

| Entry | X  | S.M.     | Solvent            | Glucose (mol %) | Base (equiv.)                         | Product  | Yield <sup>b</sup> (%) |
|-------|----|----------|--------------------|-----------------|---------------------------------------|----------|------------------------|
| 1     | I  | <b>B</b> | MeCN / Water (1:3) | 4               | Et <sub>3</sub> N (1.3)               | <b>E</b> | 97                     |
| 2     | Br | <b>B</b> | MeCN / Water (1:3) | 4               | Et <sub>3</sub> N (1.3)               | <b>E</b> | 8                      |
| 3     | Cl | <b>B</b> | MeCN / Water (1:3) | 4               | Et <sub>3</sub> N (1.3)               | <b>E</b> | 2                      |
| 4     | I  | <b>C</b> | MeCN / Water (1:3) | 4               | Et <sub>3</sub> N (1.3)               | <b>F</b> | 90                     |
| 5     | Br | <b>C</b> | MeCN / Water (1:3) | 4               | Et <sub>3</sub> N (1.3)               | <b>F</b> | 5                      |
| 6     | I  | <b>D</b> | DMF / Water (10:1) | 10              | Cs <sub>2</sub> CO <sub>3</sub> (2.0) | <b>G</b> | 98                     |
| 7     | Br | <b>D</b> | DMF / Water (10:1) | 10              | Cs <sub>2</sub> CO <sub>3</sub> (2.0) | <b>G</b> | 98                     |
| 8     | Cl | <b>D</b> | DMF / Water (10:1) | 10              | Cs <sub>2</sub> CO <sub>3</sub> (2.0) | <b>G</b> | 0                      |

<sup>a</sup> Reaction conditions: 1-iodo-4-nitrobenzene (0.78 mmol, 1 equiv.), phenylboronic acid (1.16 mmol, 1.5 equiv.), base (1.56 mmol, 2 equiv.). <sup>b</sup> Isolated yields. <sup>c</sup> A dichloromethane stock solution was employed to load the Pd(OAc)<sub>2</sub> catalyst, with the dichloromethane removed *in vacuo* prior to the addition of other substrates.

**Table S3.** Comparison of recyclable Pd-catalysed cross-coupling reactions using bio-derived supports and derivatives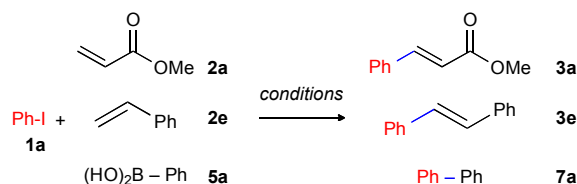

| Entry | Pd Catalyst Formation / Isolation time <sup>a</sup> / processes <sup>b</sup> | Pd Catalyst (mol %) | Cross-Coupling Conditions                                              | Product   | Yield (%) | Ref. |
|-------|------------------------------------------------------------------------------|---------------------|------------------------------------------------------------------------|-----------|-----------|------|
| 1     | 31 h / 12 steps                                                              | 0.1                 | Et <sub>3</sub> N, 80 °C, 6 h                                          | <b>3a</b> | 93        | 17   |
| 2     | 76 h / 10 steps                                                              | 0.1                 | PS-TEA <sup>c</sup> , CH <sub>3</sub> CN:H <sub>2</sub> O, 130 °C, 2 h | <b>3a</b> | 74        | 18   |
| 3     | 80.5 h / 9 steps                                                             | 1.0                 | K <sub>2</sub> CO <sub>3</sub> , H <sub>2</sub> O, 100 °C, 2 h         | <b>3e</b> | 99        | 19   |
| 4     | 18.5 h / 7 steps                                                             | 10                  | NaOAc, MeCN:H <sub>2</sub> O, 100 °C, 16 h                             | <b>3e</b> | 87        | 20   |
| 5     | 336 h / 19 steps                                                             | 0.01                | K <sub>3</sub> PO <sub>4</sub> , H <sub>2</sub> O:EtOH, 80 °C, 18 h    | <b>7a</b> | 89        | 21   |
| 6     | 88.5 h / 9 steps                                                             | 0.9                 | K <sub>2</sub> CO <sub>3</sub> , MeOH, 100 °C, 22 h <sup>c</sup>       | <b>7a</b> | 86        | 22   |
| 7     | 224.5 h / 10 steps                                                           | 0.5                 | K <sub>2</sub> CO <sub>3</sub> , H <sub>2</sub> O:EtOH, 60 °C, 0.25 h  | <b>7a</b> | 99        | 23   |
| 8     | 51 h / 8 steps                                                               | 0.5                 | K <sub>2</sub> CO <sub>3</sub> , xylene, 143 °C, 1 h                   | <b>7a</b> | 85        | 24   |
| 9     | 30 h / 11 steps                                                              | 0.2                 | K <sub>2</sub> CO <sub>3</sub> , H <sub>2</sub> O:DMF, 90 °C, 1.5 h    | <b>7a</b> | 95        | 25   |

<sup>a</sup> Times were approximated from published experimental conditions and do not include work-up or isolation procedures for which no times were reported.

<sup>b</sup> The number of processes was calculated based on the sum of the chemical transformation(s), isolation(s) and purification(s).

<sup>c</sup> Chlorobenzene was used

## VII. References

1. Filipe, V.; Hawe, A.; Jiskoot, J. *Pharm. Res.* **2010**, *27*, 796–810.
2. Schätzel, K.; Drewel, M.; Ahrens, J. *J. Phy.: Condens. Matter* **1990**, *2*, SA393–SA398.
3. Roberts, G. S.; Kozak, D.; Anderson, W.; Broom, M. F.; Vogel, R.; Trau, M. *Small* **2010**, *6*, 2653–2658.
4. Cvengoš, J.; Schütte, J.; Schlörer, N.; Neudörfl, J.; Schmals, H.-G. *Angew. Chem. Int. Ed.* **2009**, *48*, 6148–6151.
5. Miller, R. S.; Curtin, D. Y.; Paul, I. C. *J. Am. Chem. Soc.* **1971**, *93*, 2784–2786.
6. Cervinka, O.; Kriz, O. *Coll. Czech. Chem. Comm.* **1983**, *48*, 2952–2964.
7. Boter, J. H.; Alul, A. *J. Am. Chem. Soc.* **1959**, *81*, 2136–2137.
8. Diéguez, H. R.; López, A.; Domingo, V.; Arteaga, J. F.; Dobado, J. A.; Herrador, M. M.; Quílez del Moral, J. F.; Barrero, A. F. *J. Am. Chem. Soc.* **2009**, *132*, 254–259.
9. Najman, R.; Cho, J. K.; Coffey, A. F.; Davies, J. W.; Bradley, M. *Chem. Comm.* **2007**, *47*, 5031–5033.
10. Modak, A.; Mondal, J.; Sasidharan, M.; Bhaumik, A. *Green Chem.* **2011**, *13*, 1317–1331.
11. Yang, F.; Cui, X.; Li, Y.; Zhang, J.; Ren, G.; Wu, Y. *Tetrahedron* **2007**, *63*, 1963–1969.
12. Swamy, N. K.; Yazici, A.; Pyne, S. G. *J. Org. Chem.* **2010**, *75*, 3412–3419.
13. Singh, F. V.; Stefani, H. A. *Tetrahedron Lett.* **2010**, *51*, 863–867.
14. Molander, G. A.; Iannazzo, L. *J. Org. Chem.* **2011**, *76*, 9182–9187.
15. Kappe O. C.; Glasnov, T. N. *Adv. Synth. Catal.* **2010**, *352*, 3089–3097.
16. McGonagle, F. I.; Sneddon, H. F.; Jamieson, C.; Watson, A. J. B. *ACS Sustainable Chem. Eng.* **2014**, *2*, 523–532.
17. C. Shen, H. Shen, M. Yang, C. Xia and P. Zhang, *Green Chem.*, 2015, **17**, 225–230.
18. L. Vaccaro, C. Petrucci, G. Strappaveccia, F. Giacalone, M. Gruttadauria and F. Pizzo, *ACS Sustainable Chem. Eng.*, 2014, **2**, 2813–2819.
19. A. Khalafi-Nezhad and F. Panahi, *ACS Sustainable Chem. Eng.*, 2014, **2**, 1177–1186.
20. M. Rezayat, R. K. Blundell, J. E. Camp, D. A. Walsh and W. Thielemans, *ACS Sustainable Chem. Eng.*, 2014, **2**, 1241–1250.
21. S. Gatard, L. Salmon, C. Deraedt, J. Ruiz, D. Astruc and S. Bouquillon, *Eur. J. Inorg. Chem.*, 2014, 4369–4375.
22. P. Puthiaraj and W.-S. Ahn, *Catal. Commun.*, 2015, **65**, 91–95.
23. H.-Q. Song, Q. Zhu, X.-J. Zheng and X.-G. Chen, *J. Mater. Chem., A* 2015, **3**, 10368–10377.
24. J. J. E. Hardy, S. Hubert, D. J. Macquarrie and A. J. Wilson, *Green Chem.*, 2004, **6**, 53–56.
25. C. B. Putta and S. Ghosh, *Adv. Synth. Catal.*, 2011, **353**, 1889–1896.

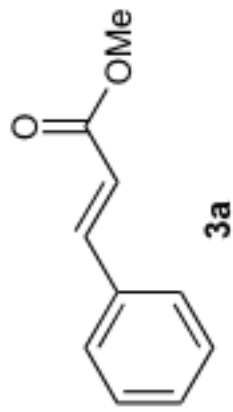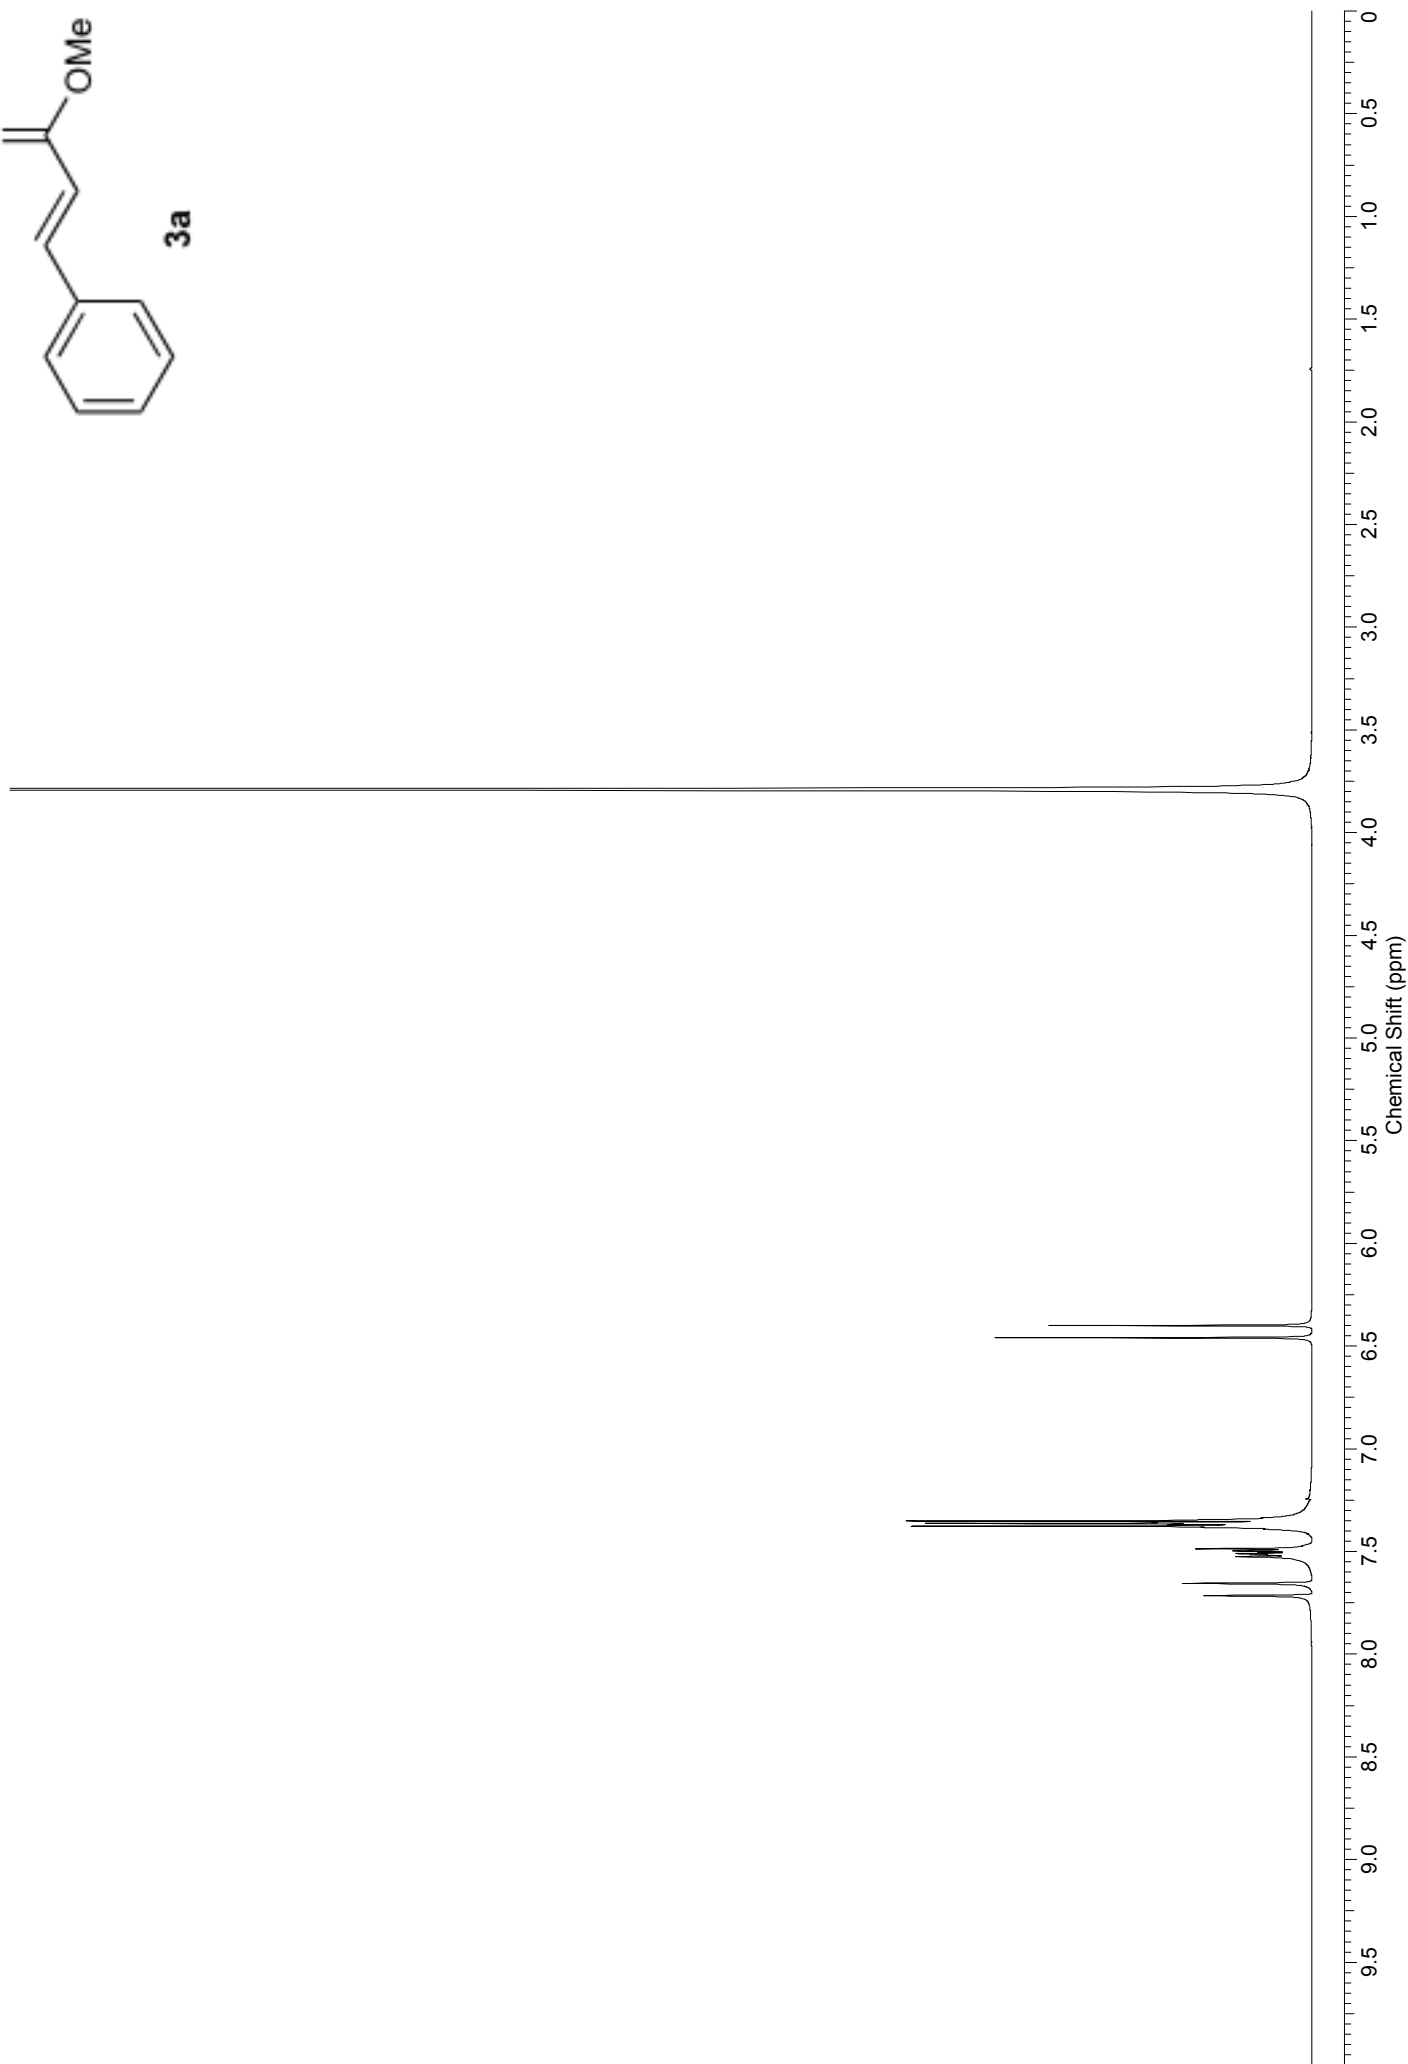

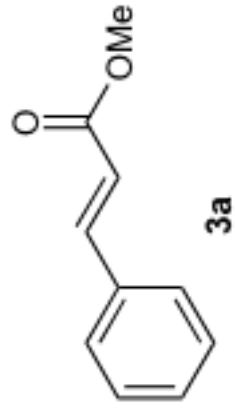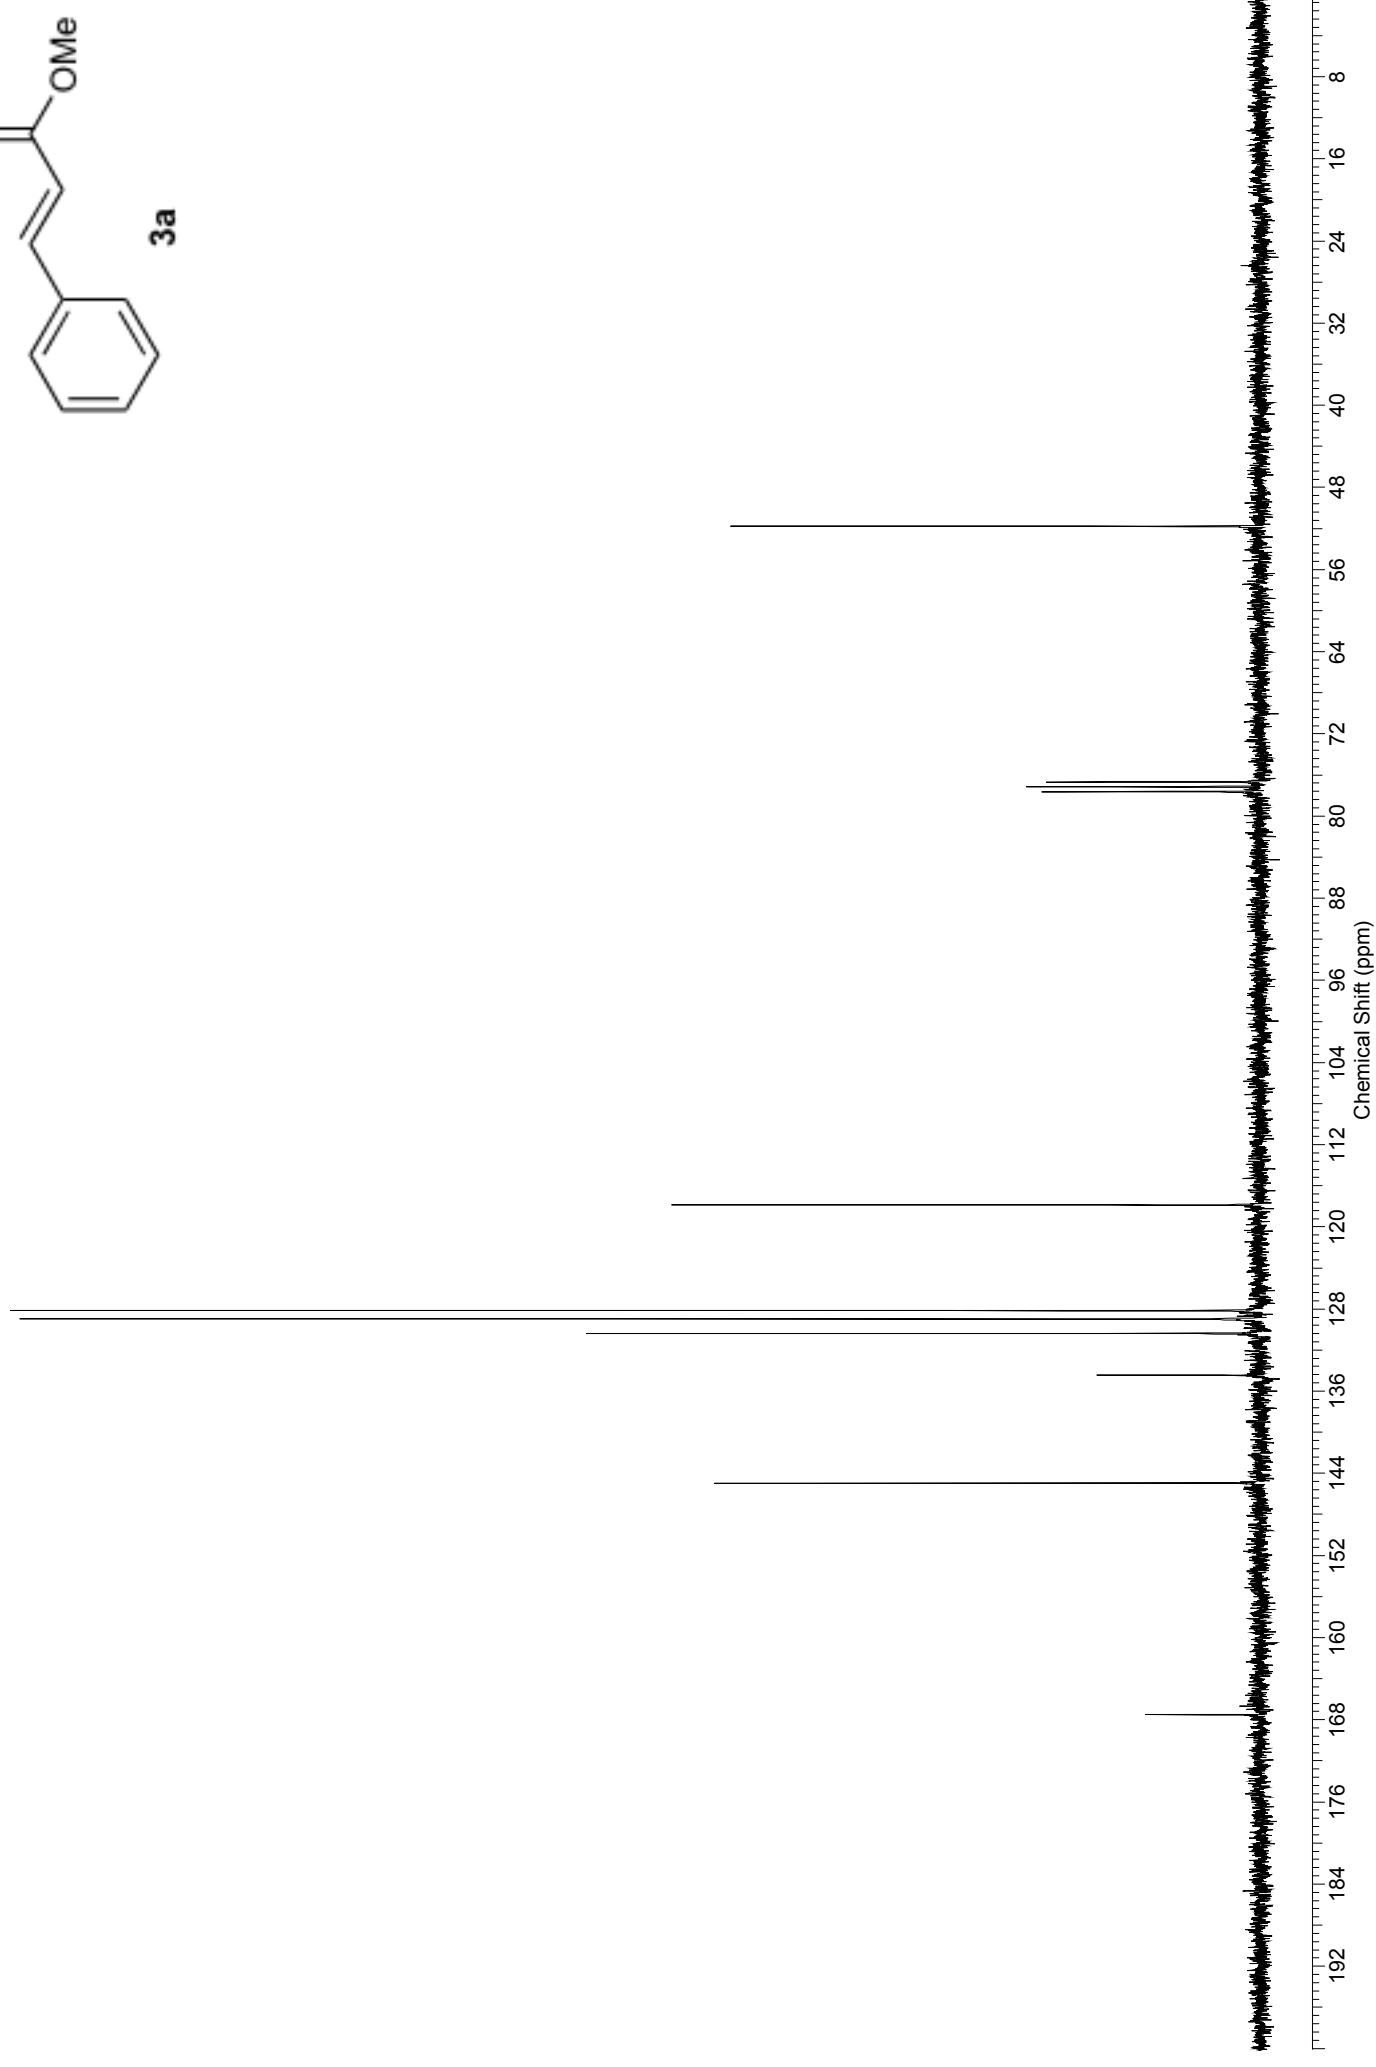

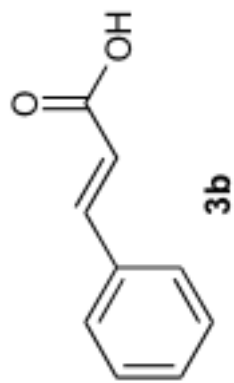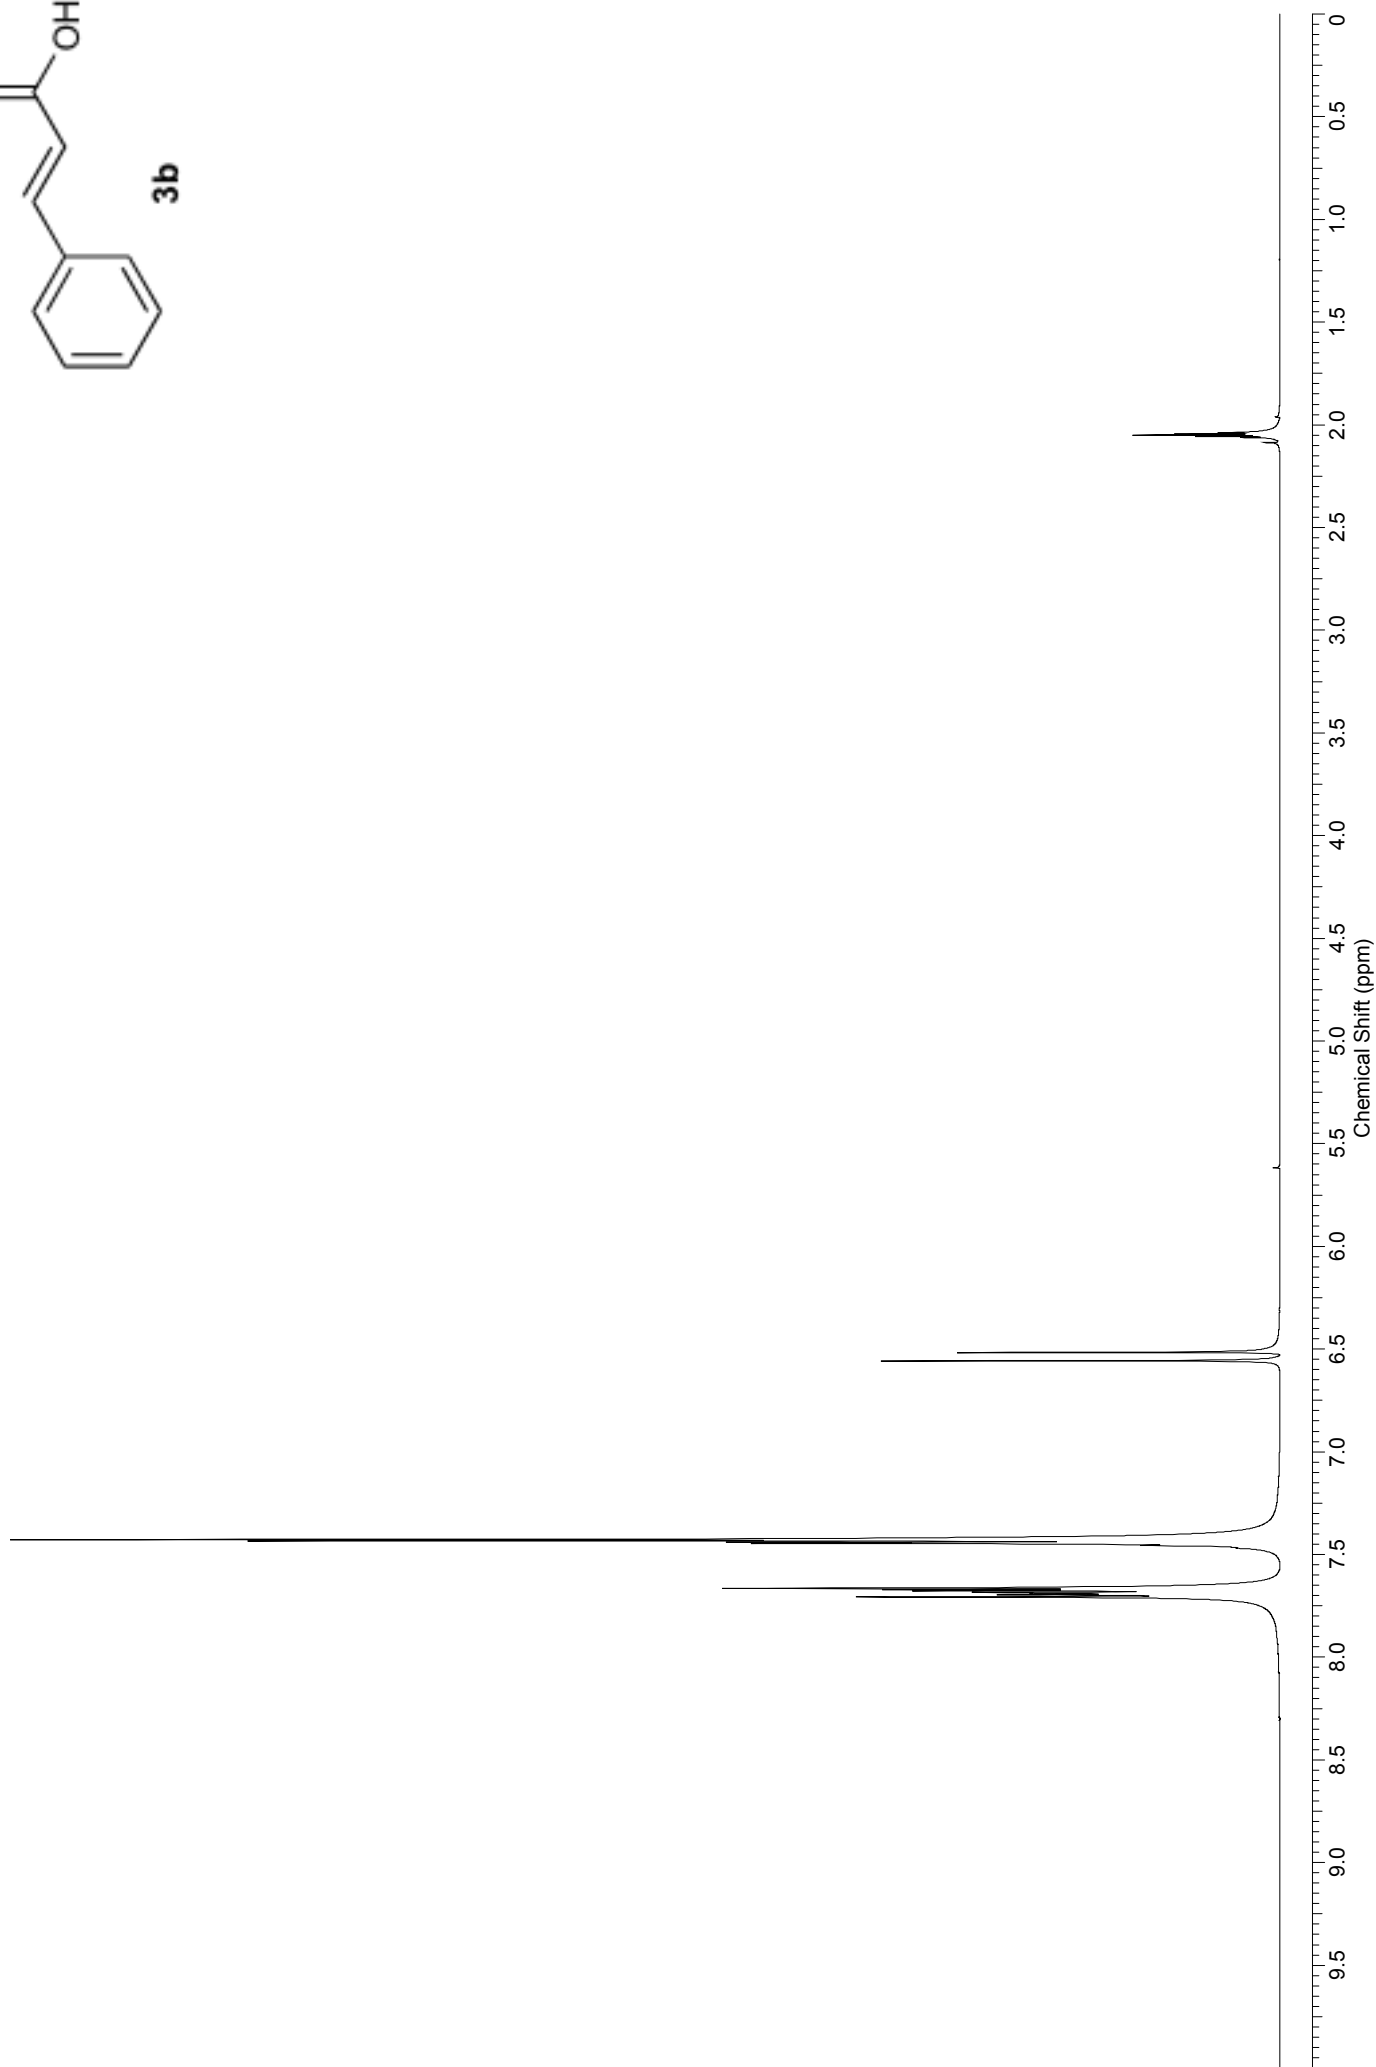

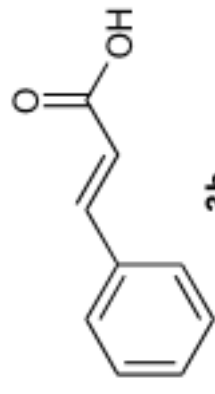

3b

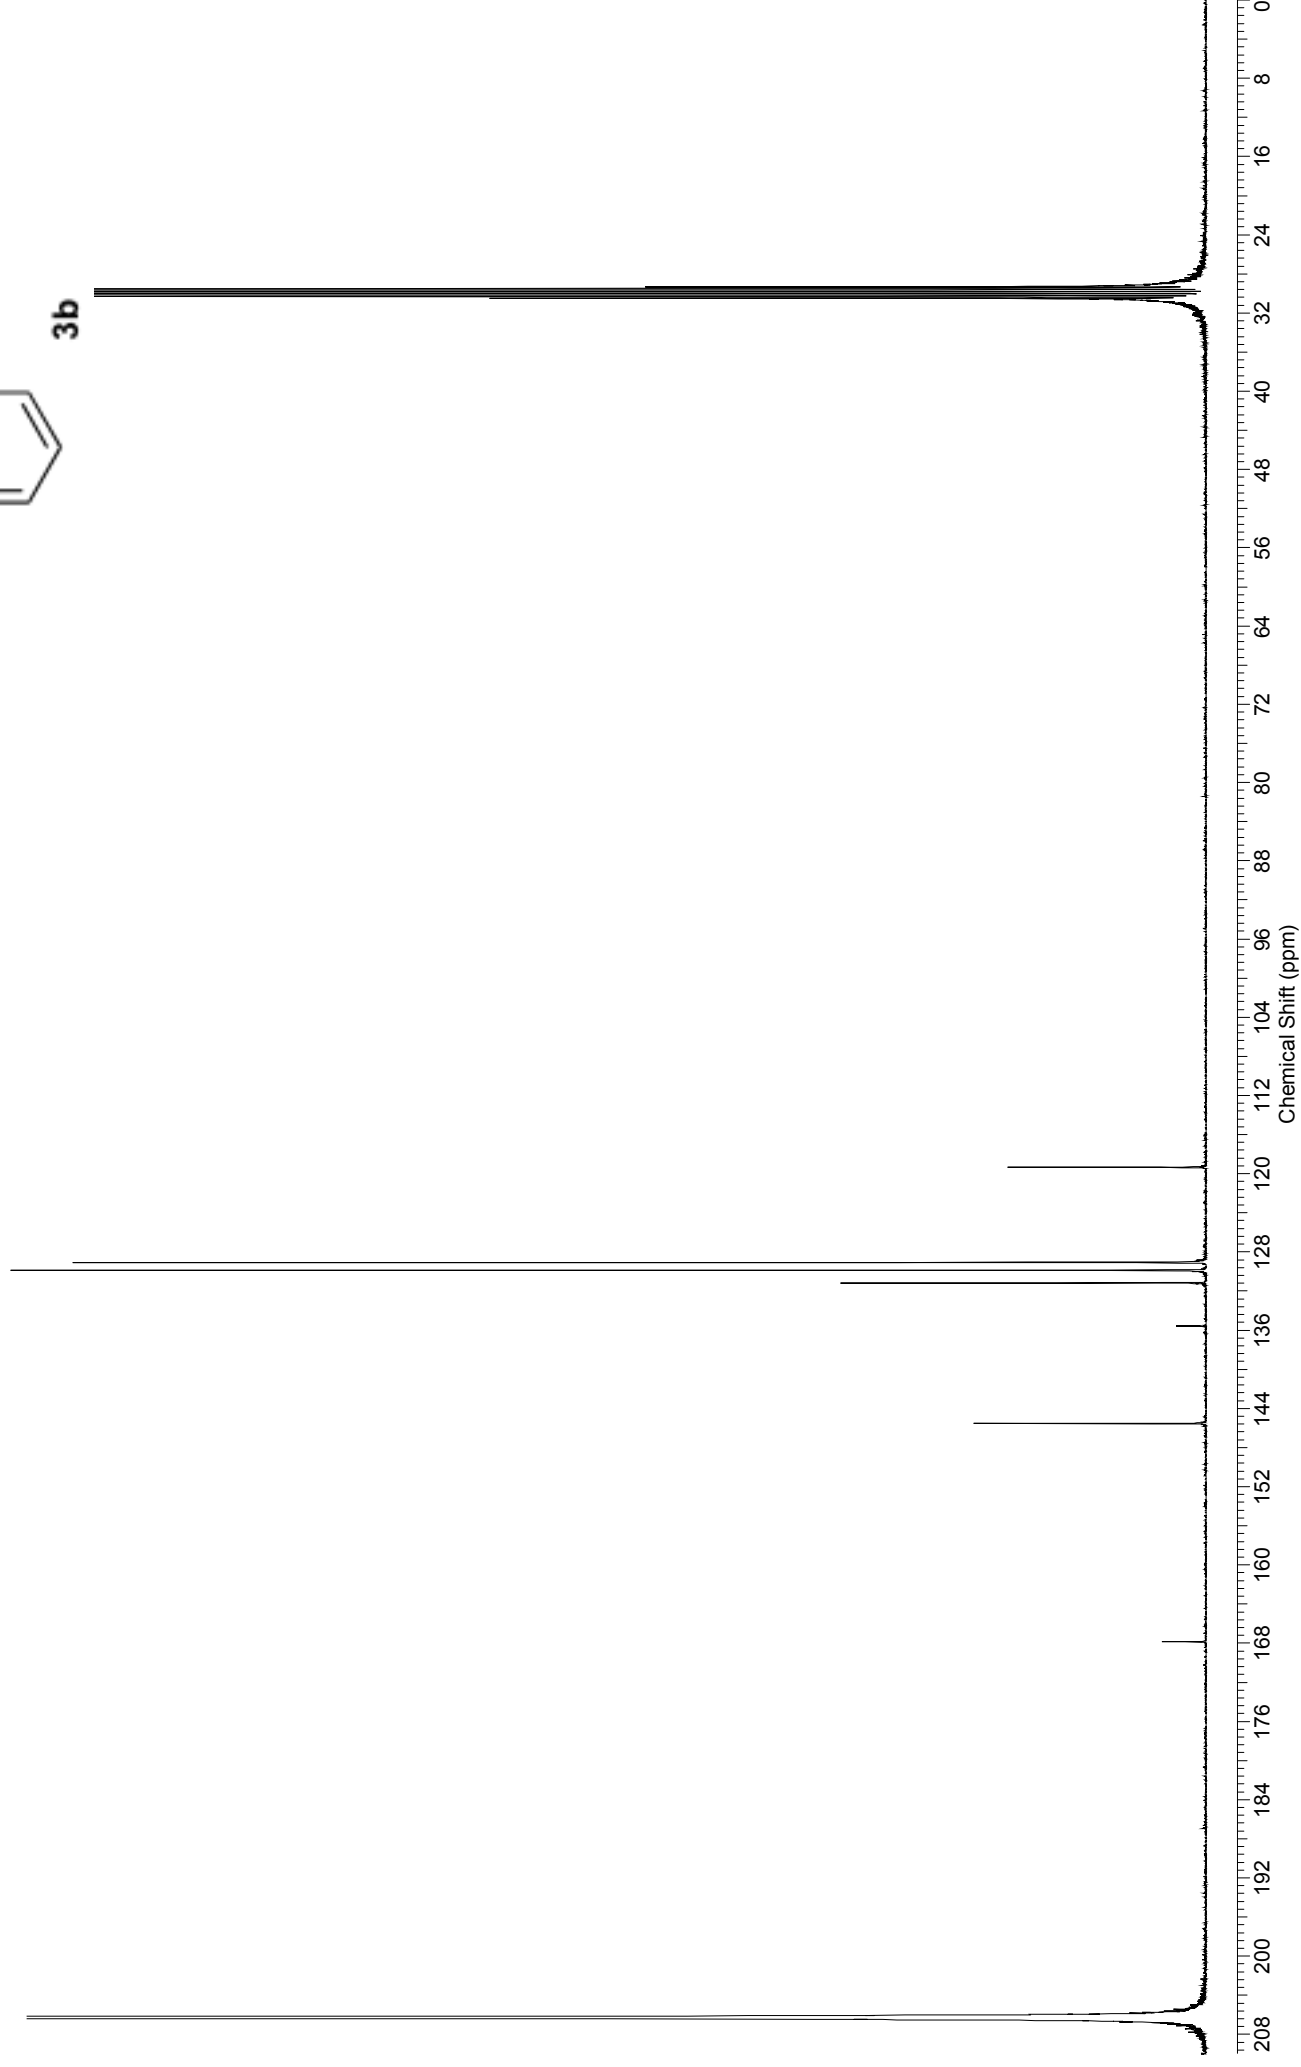

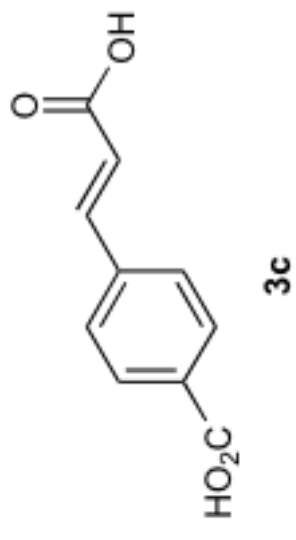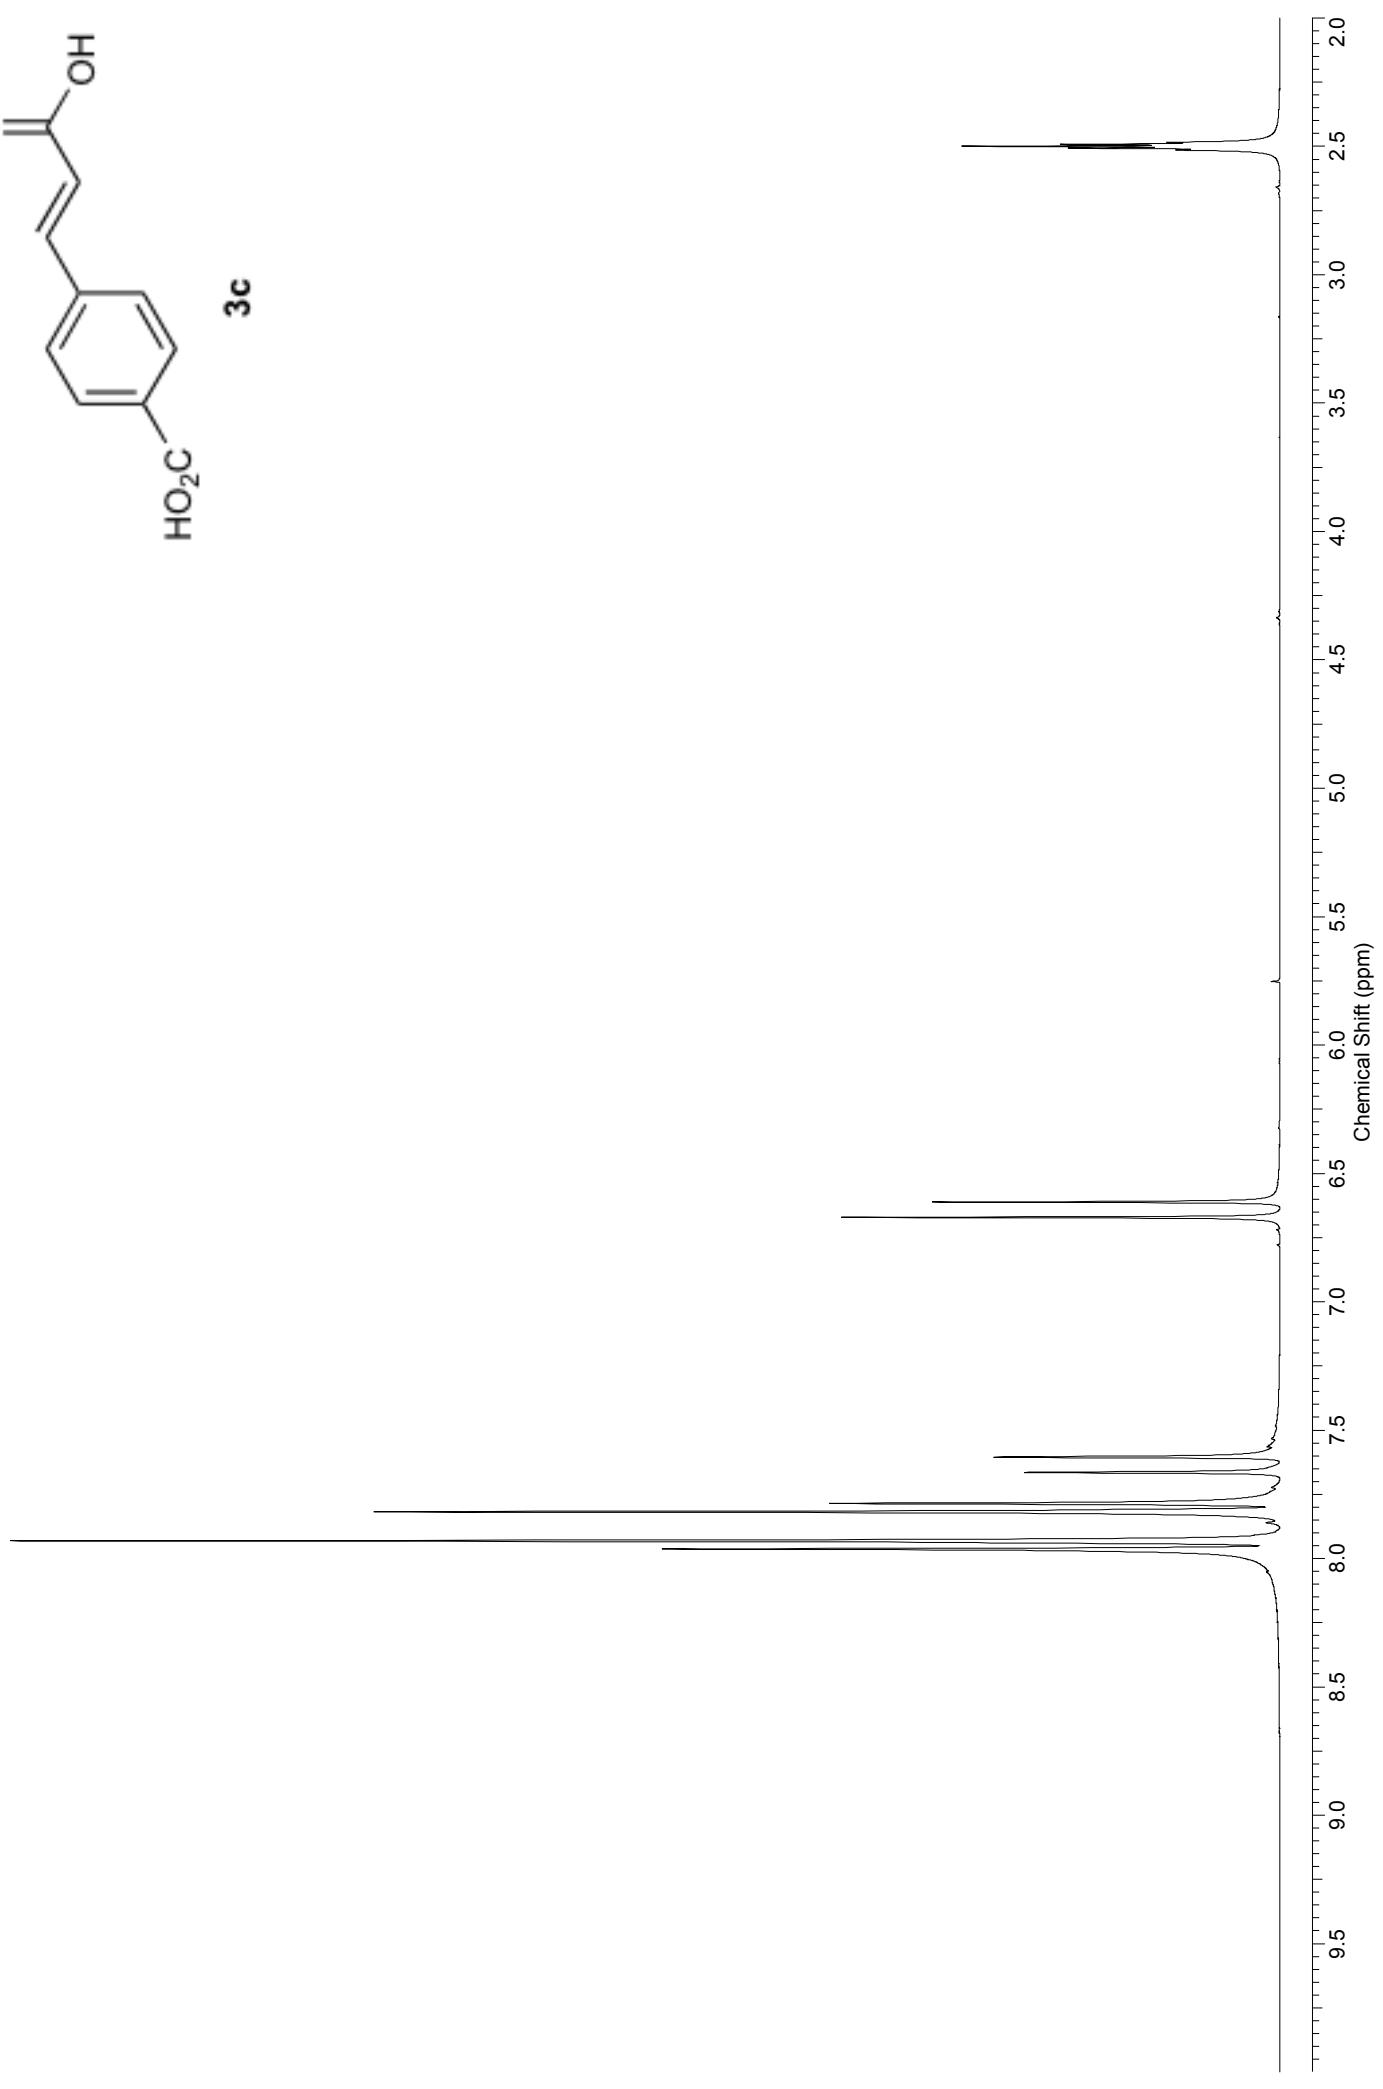

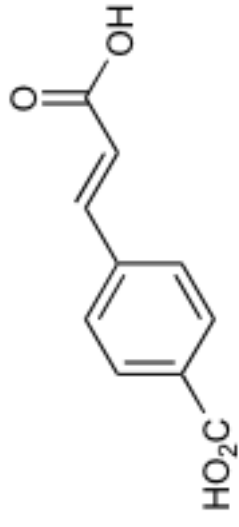

36

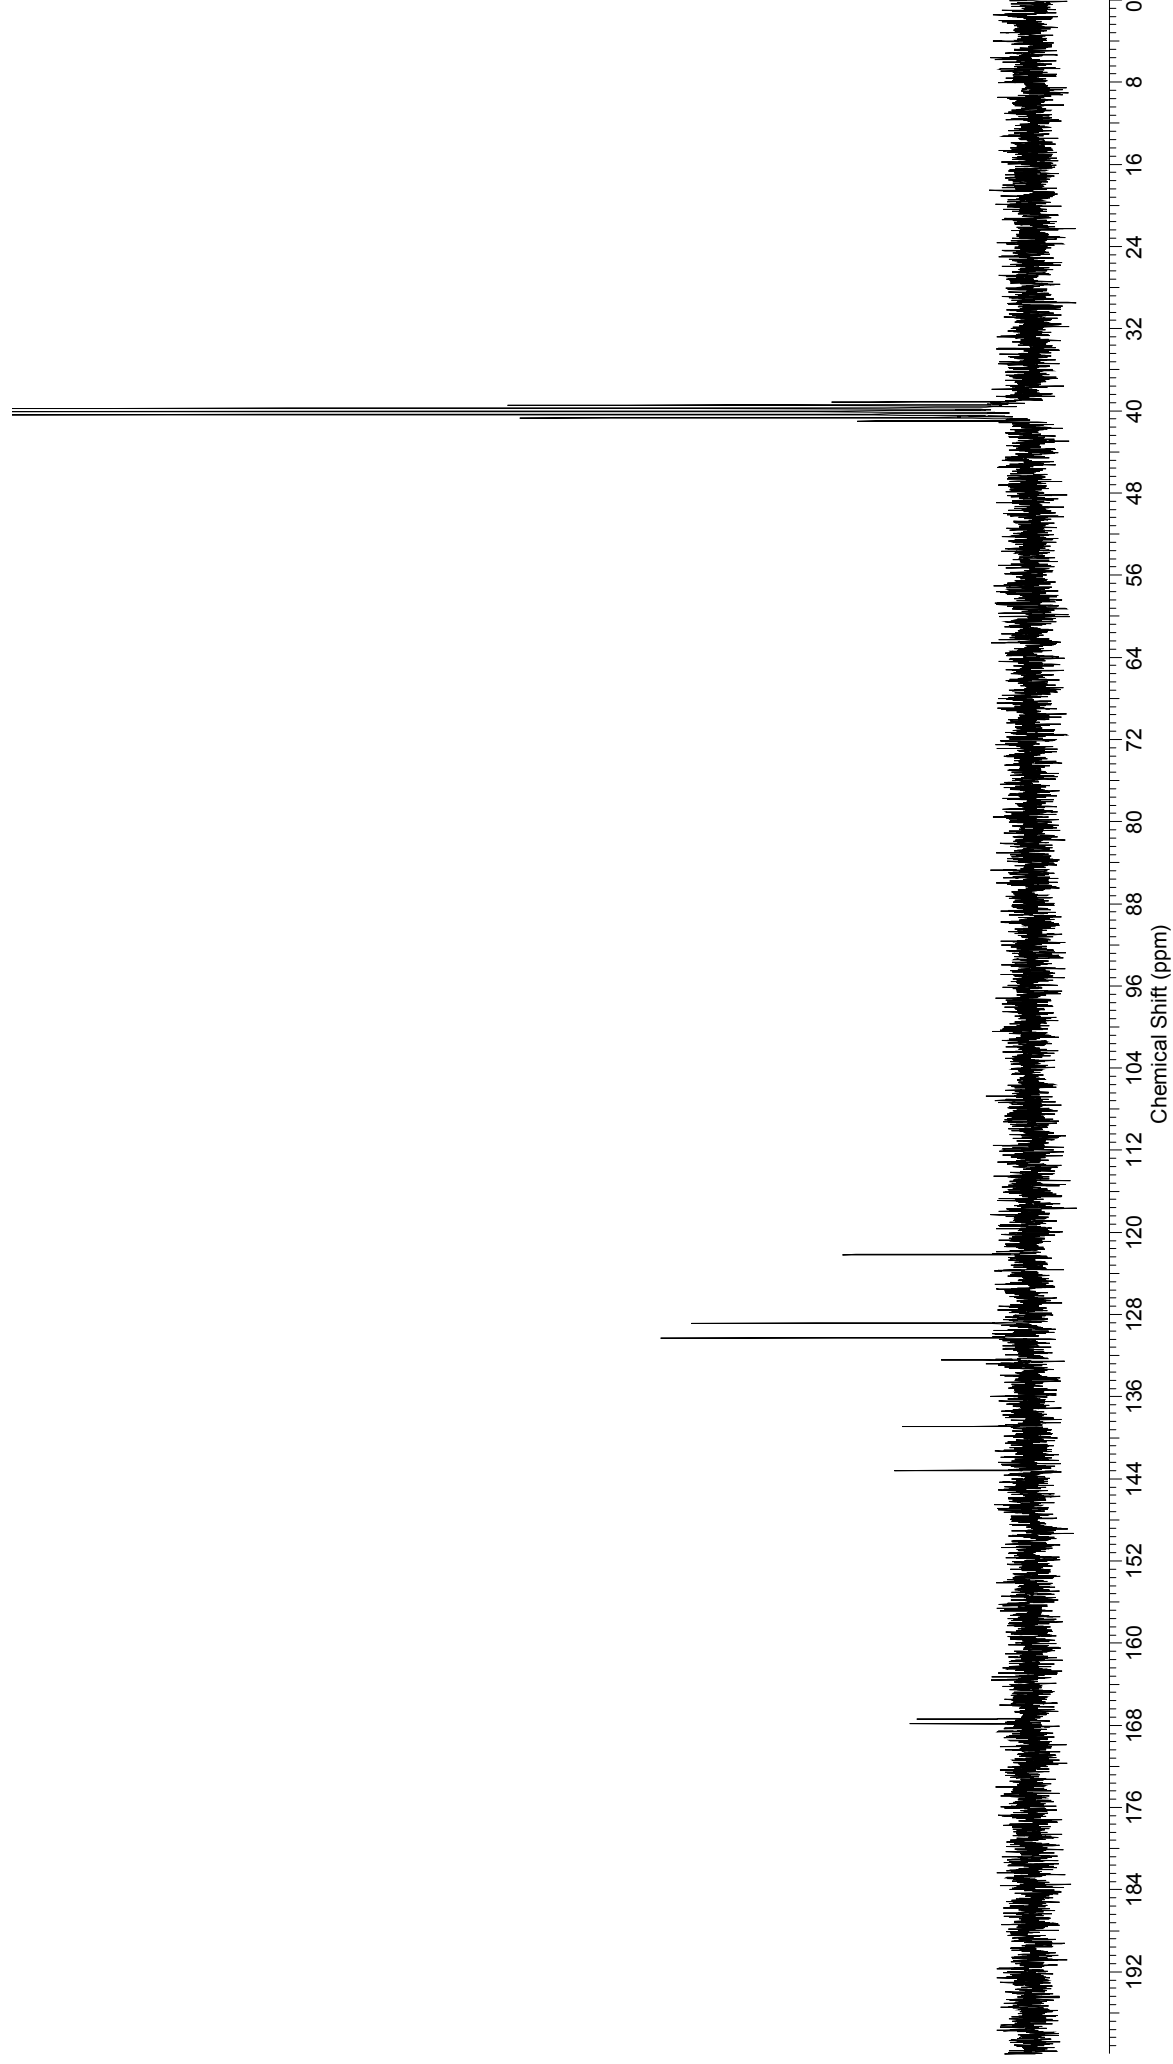

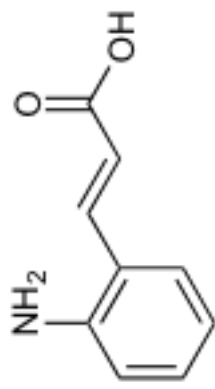

**3d**

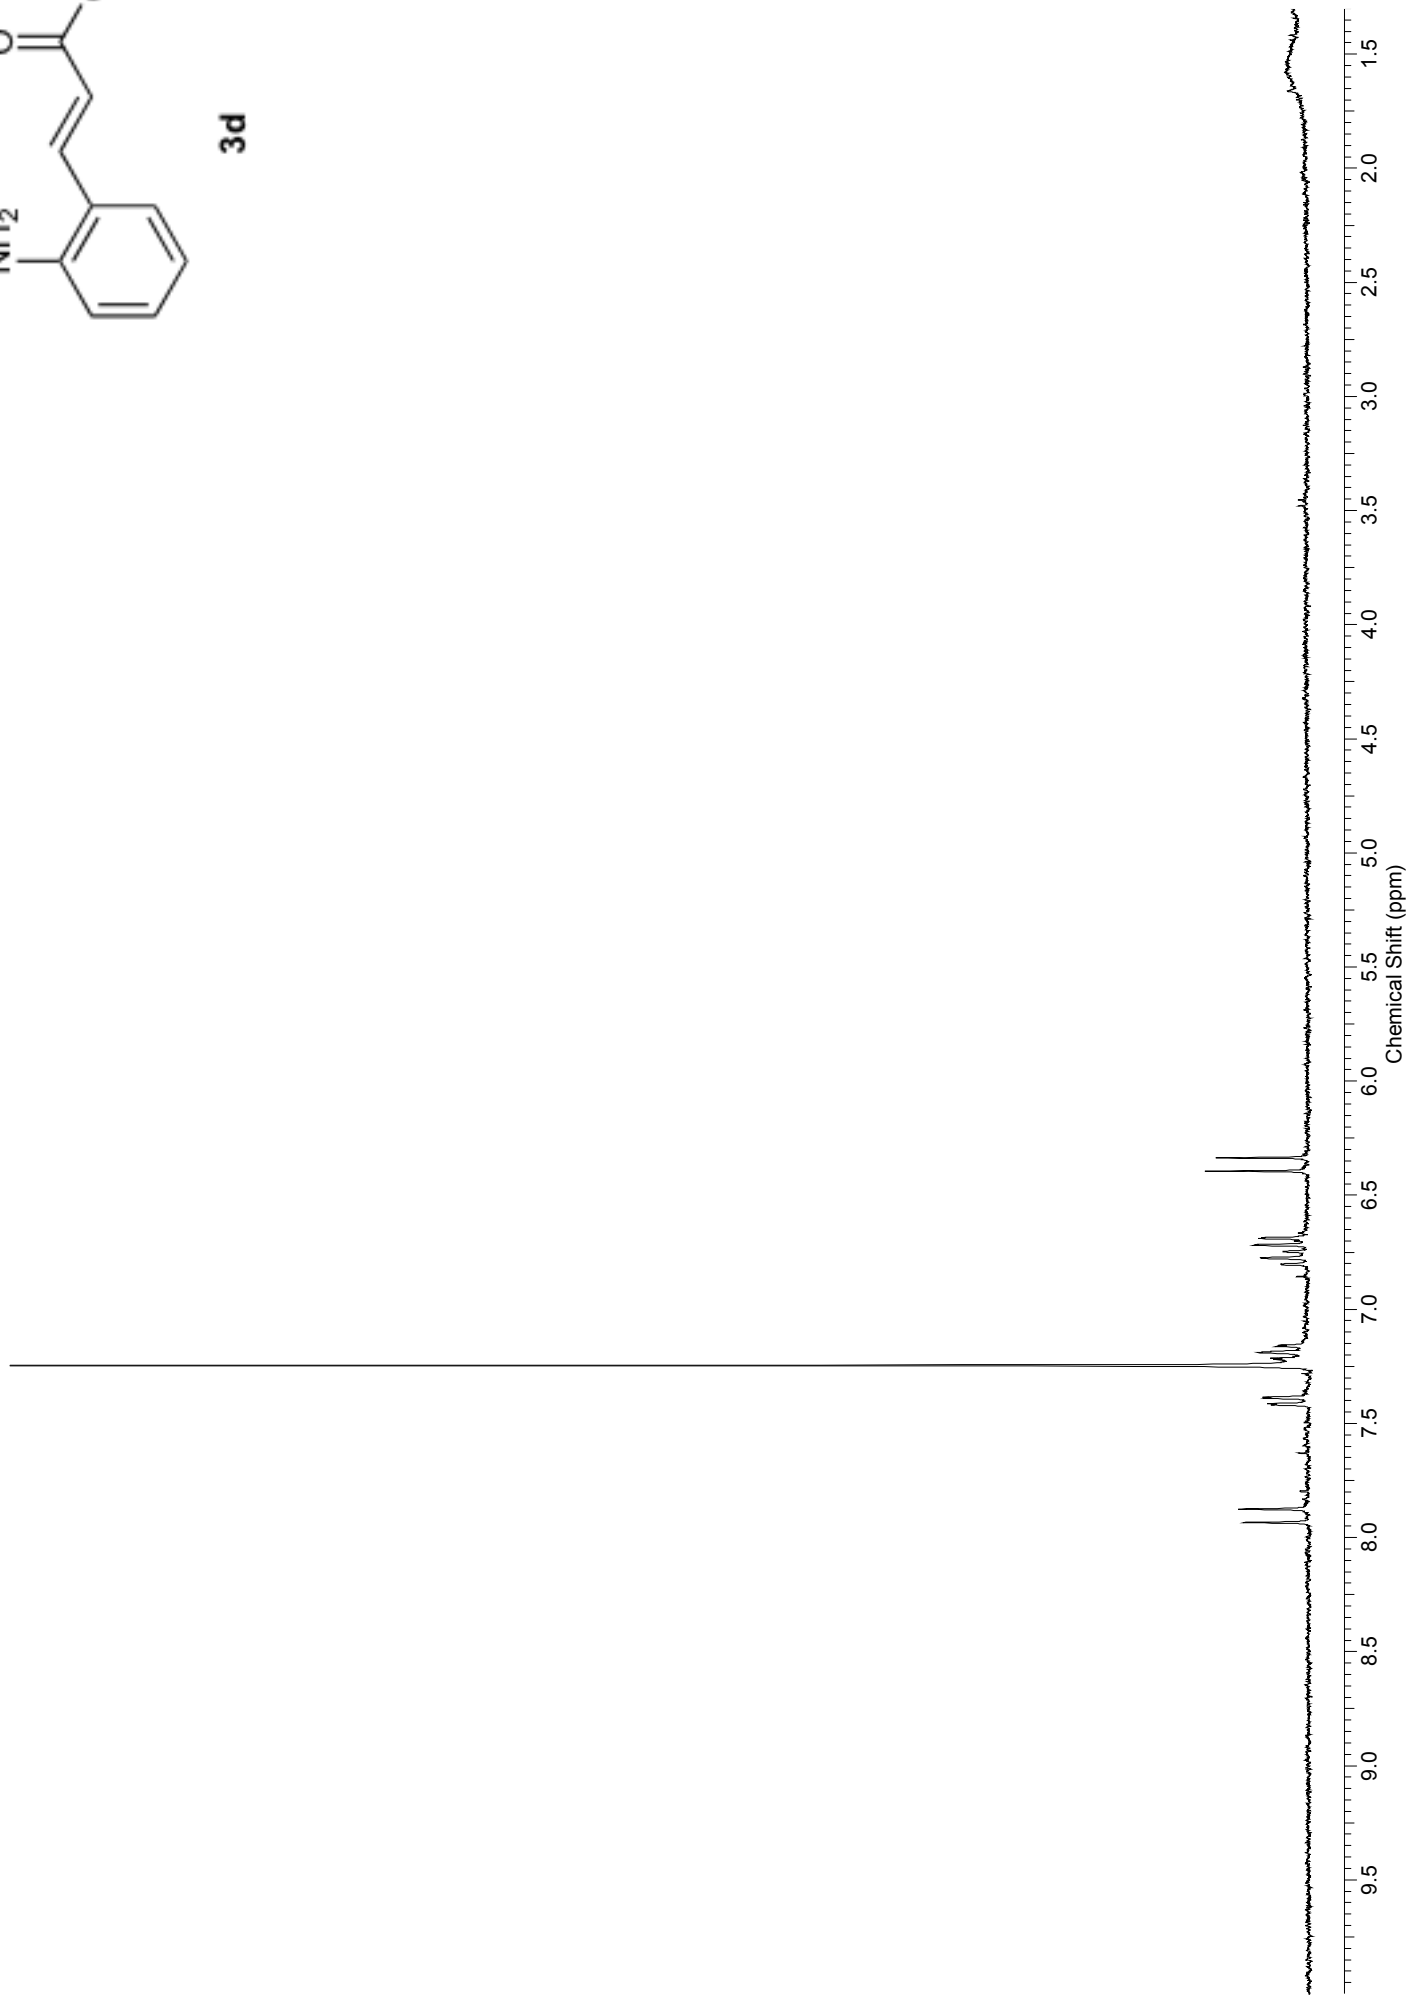

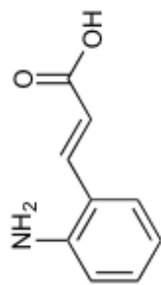

3d

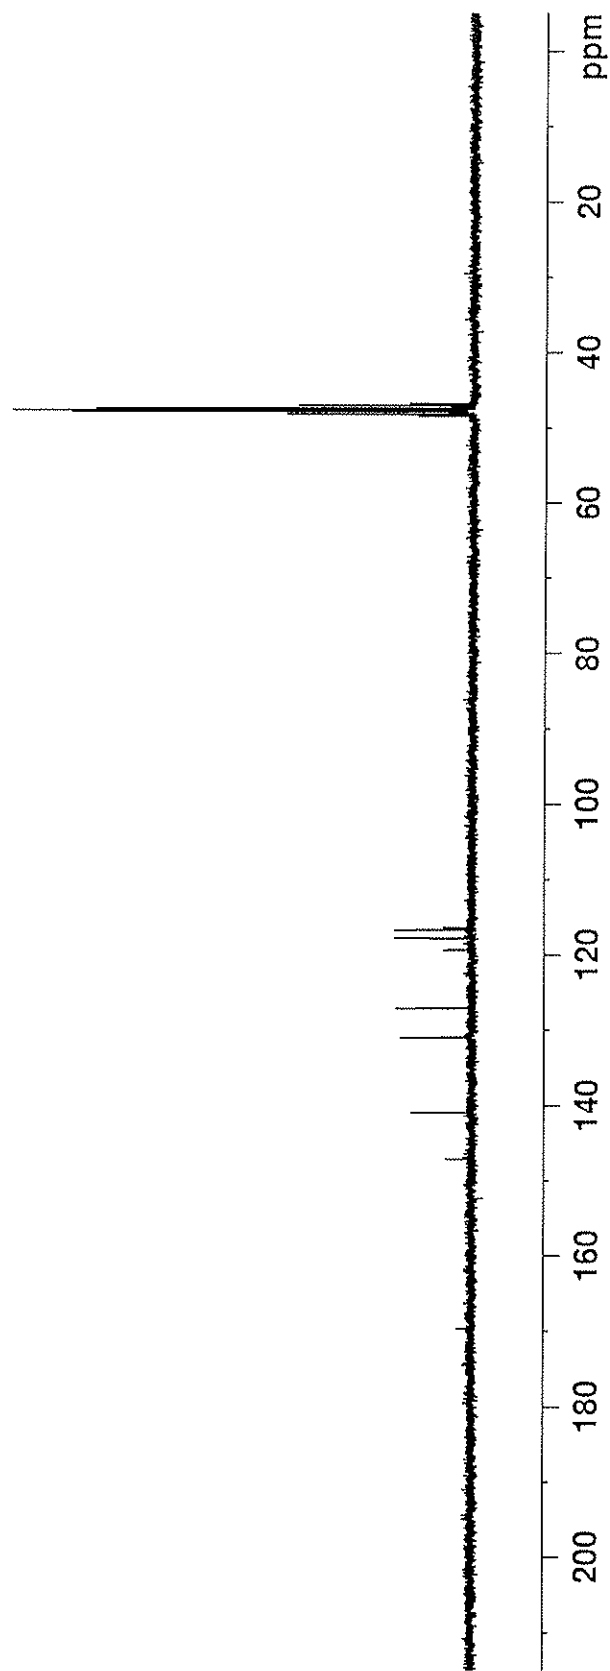

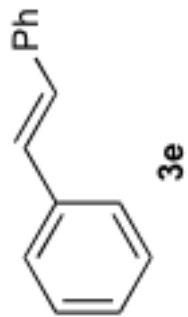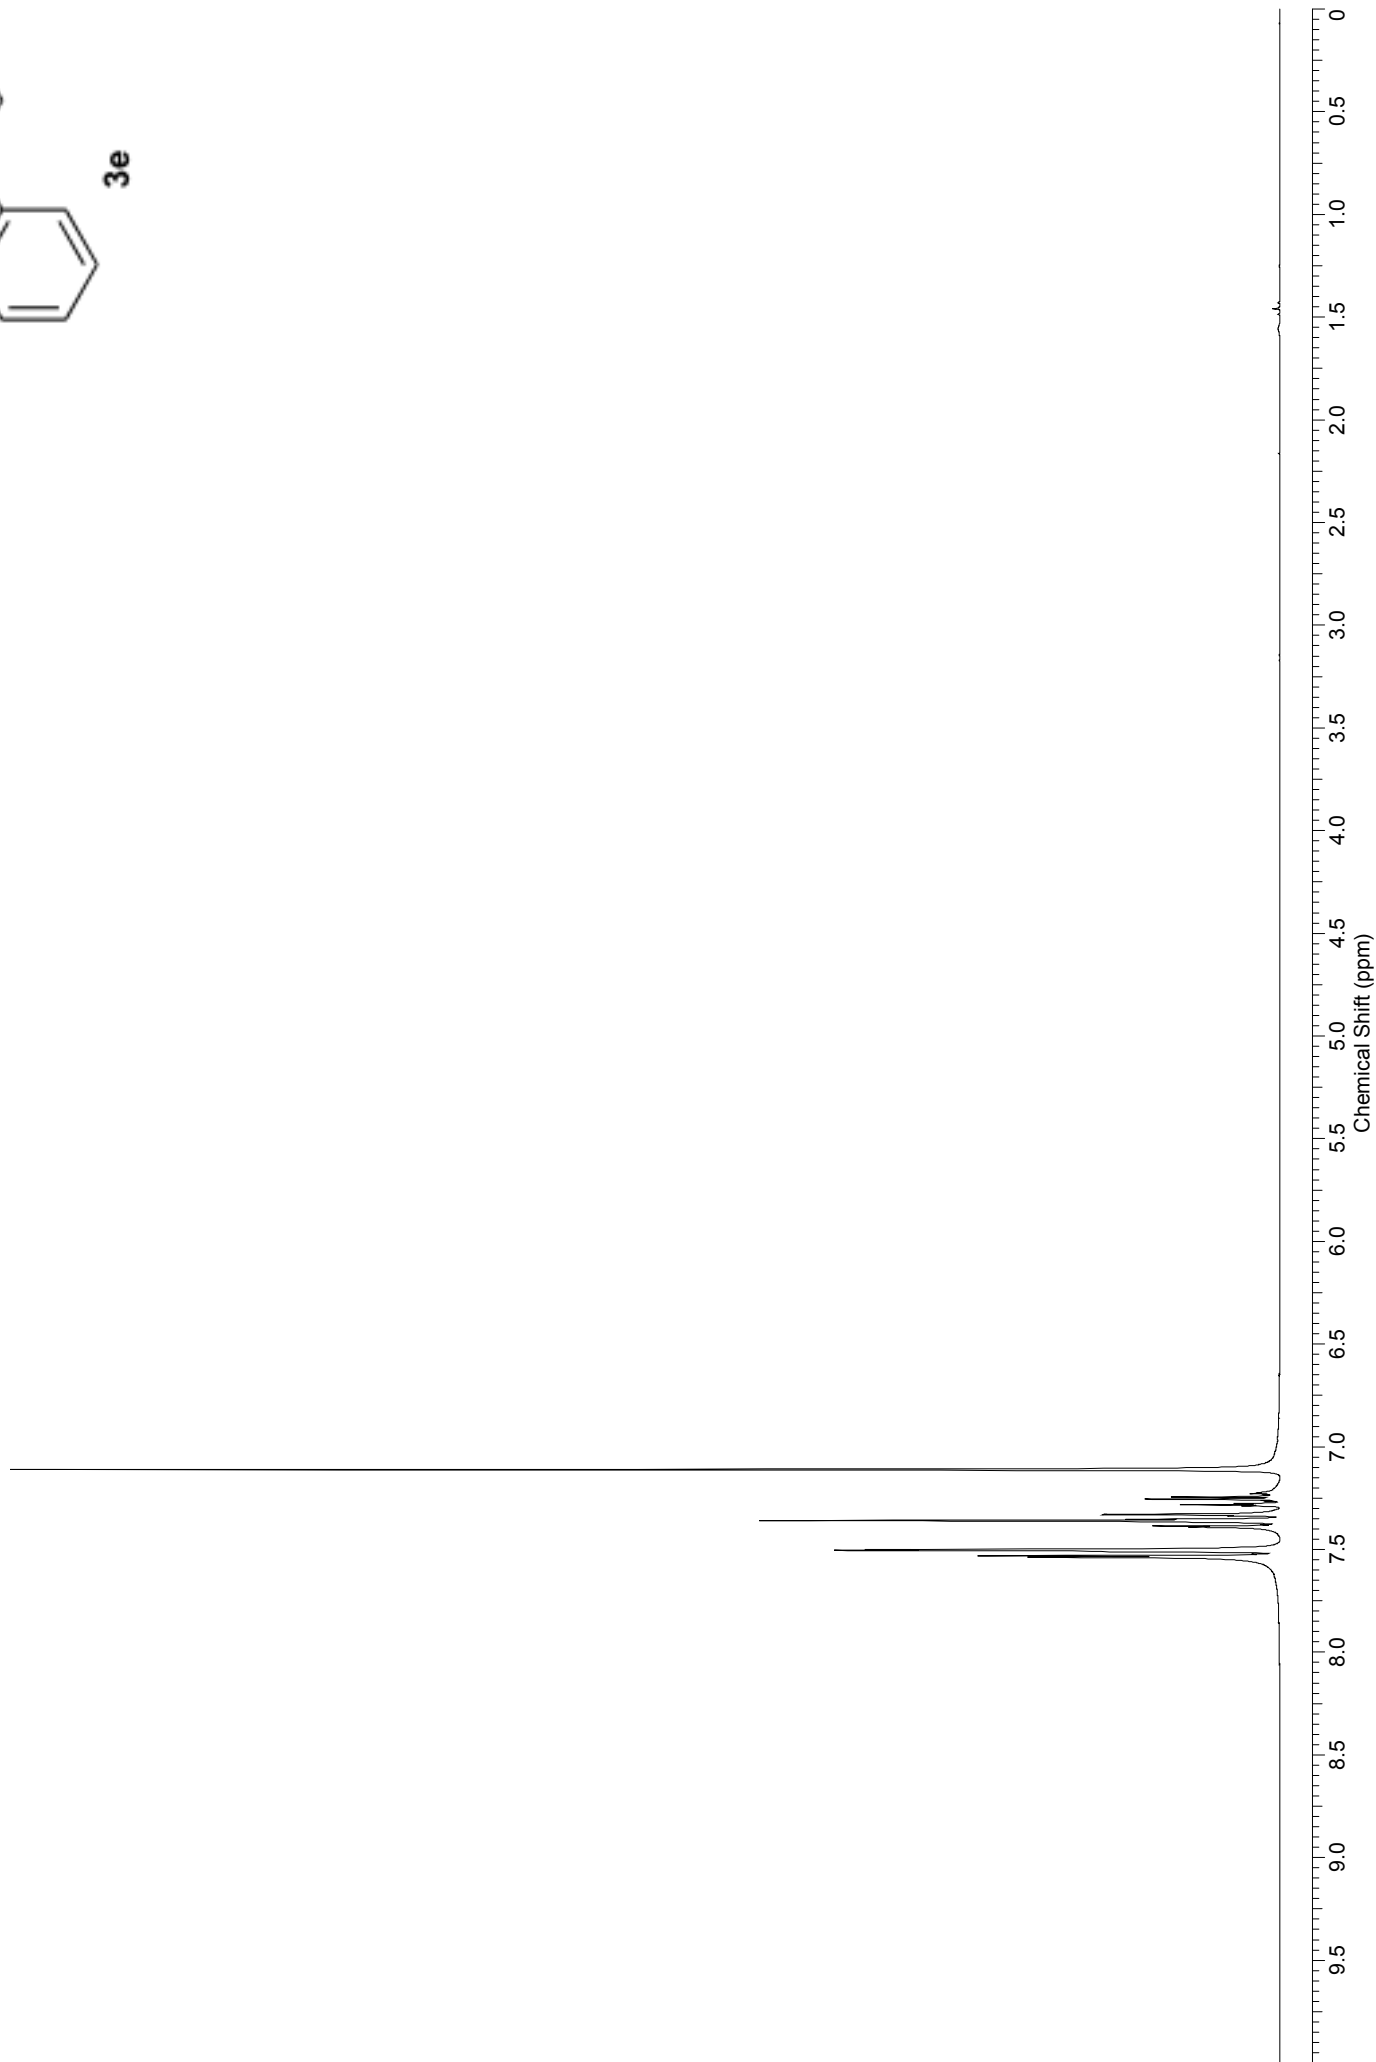

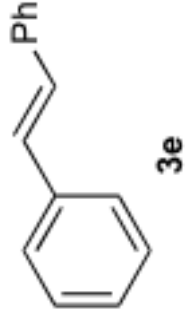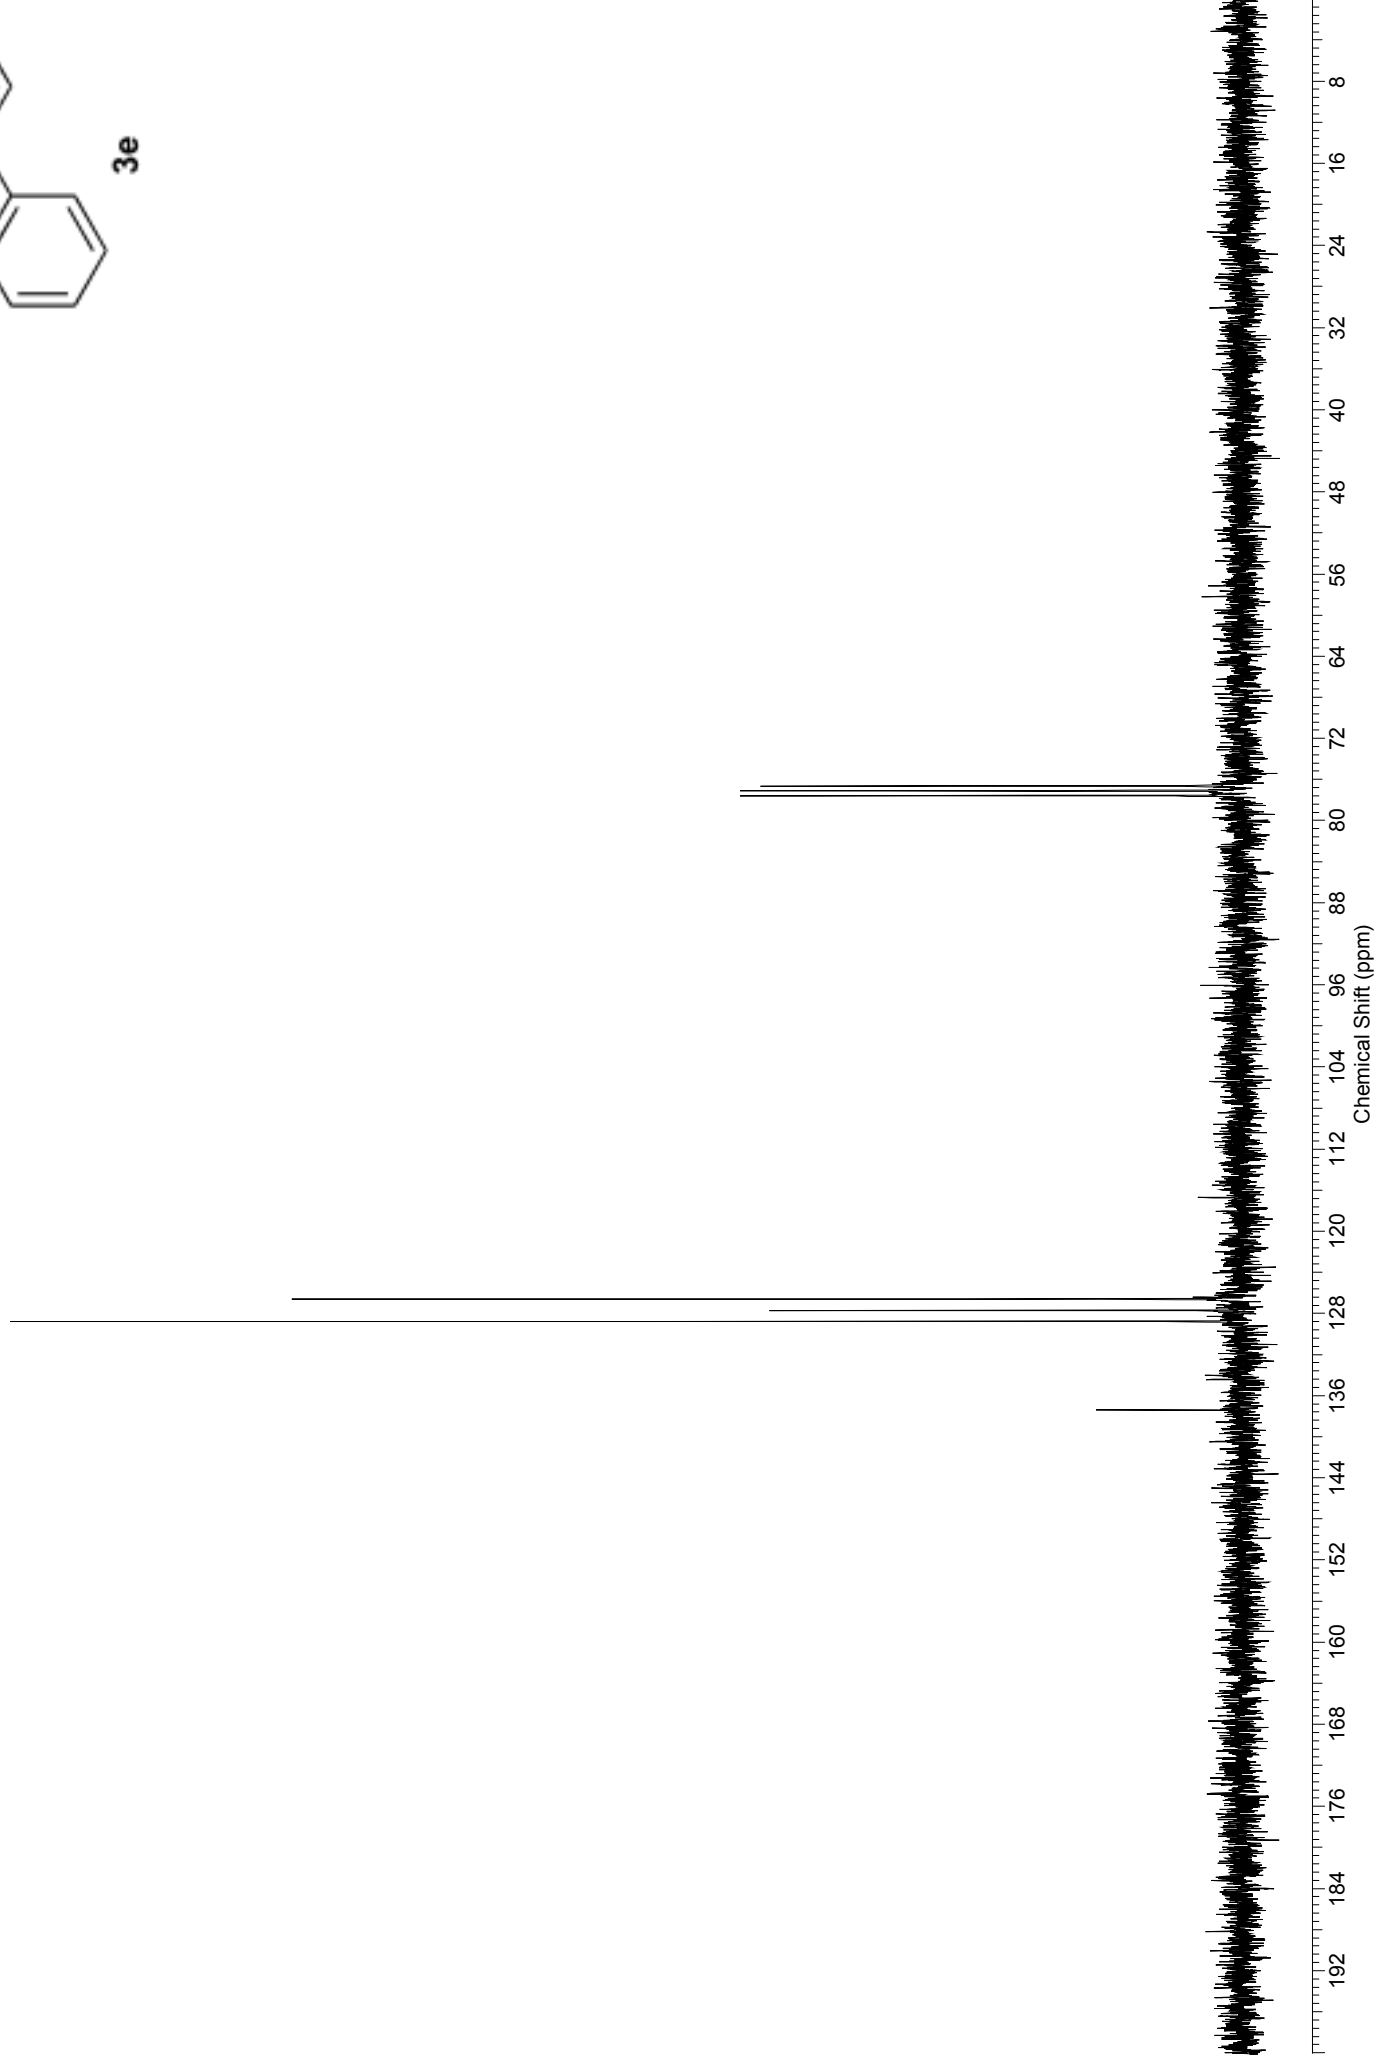

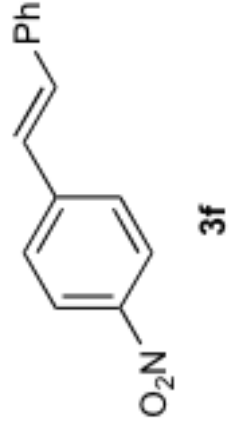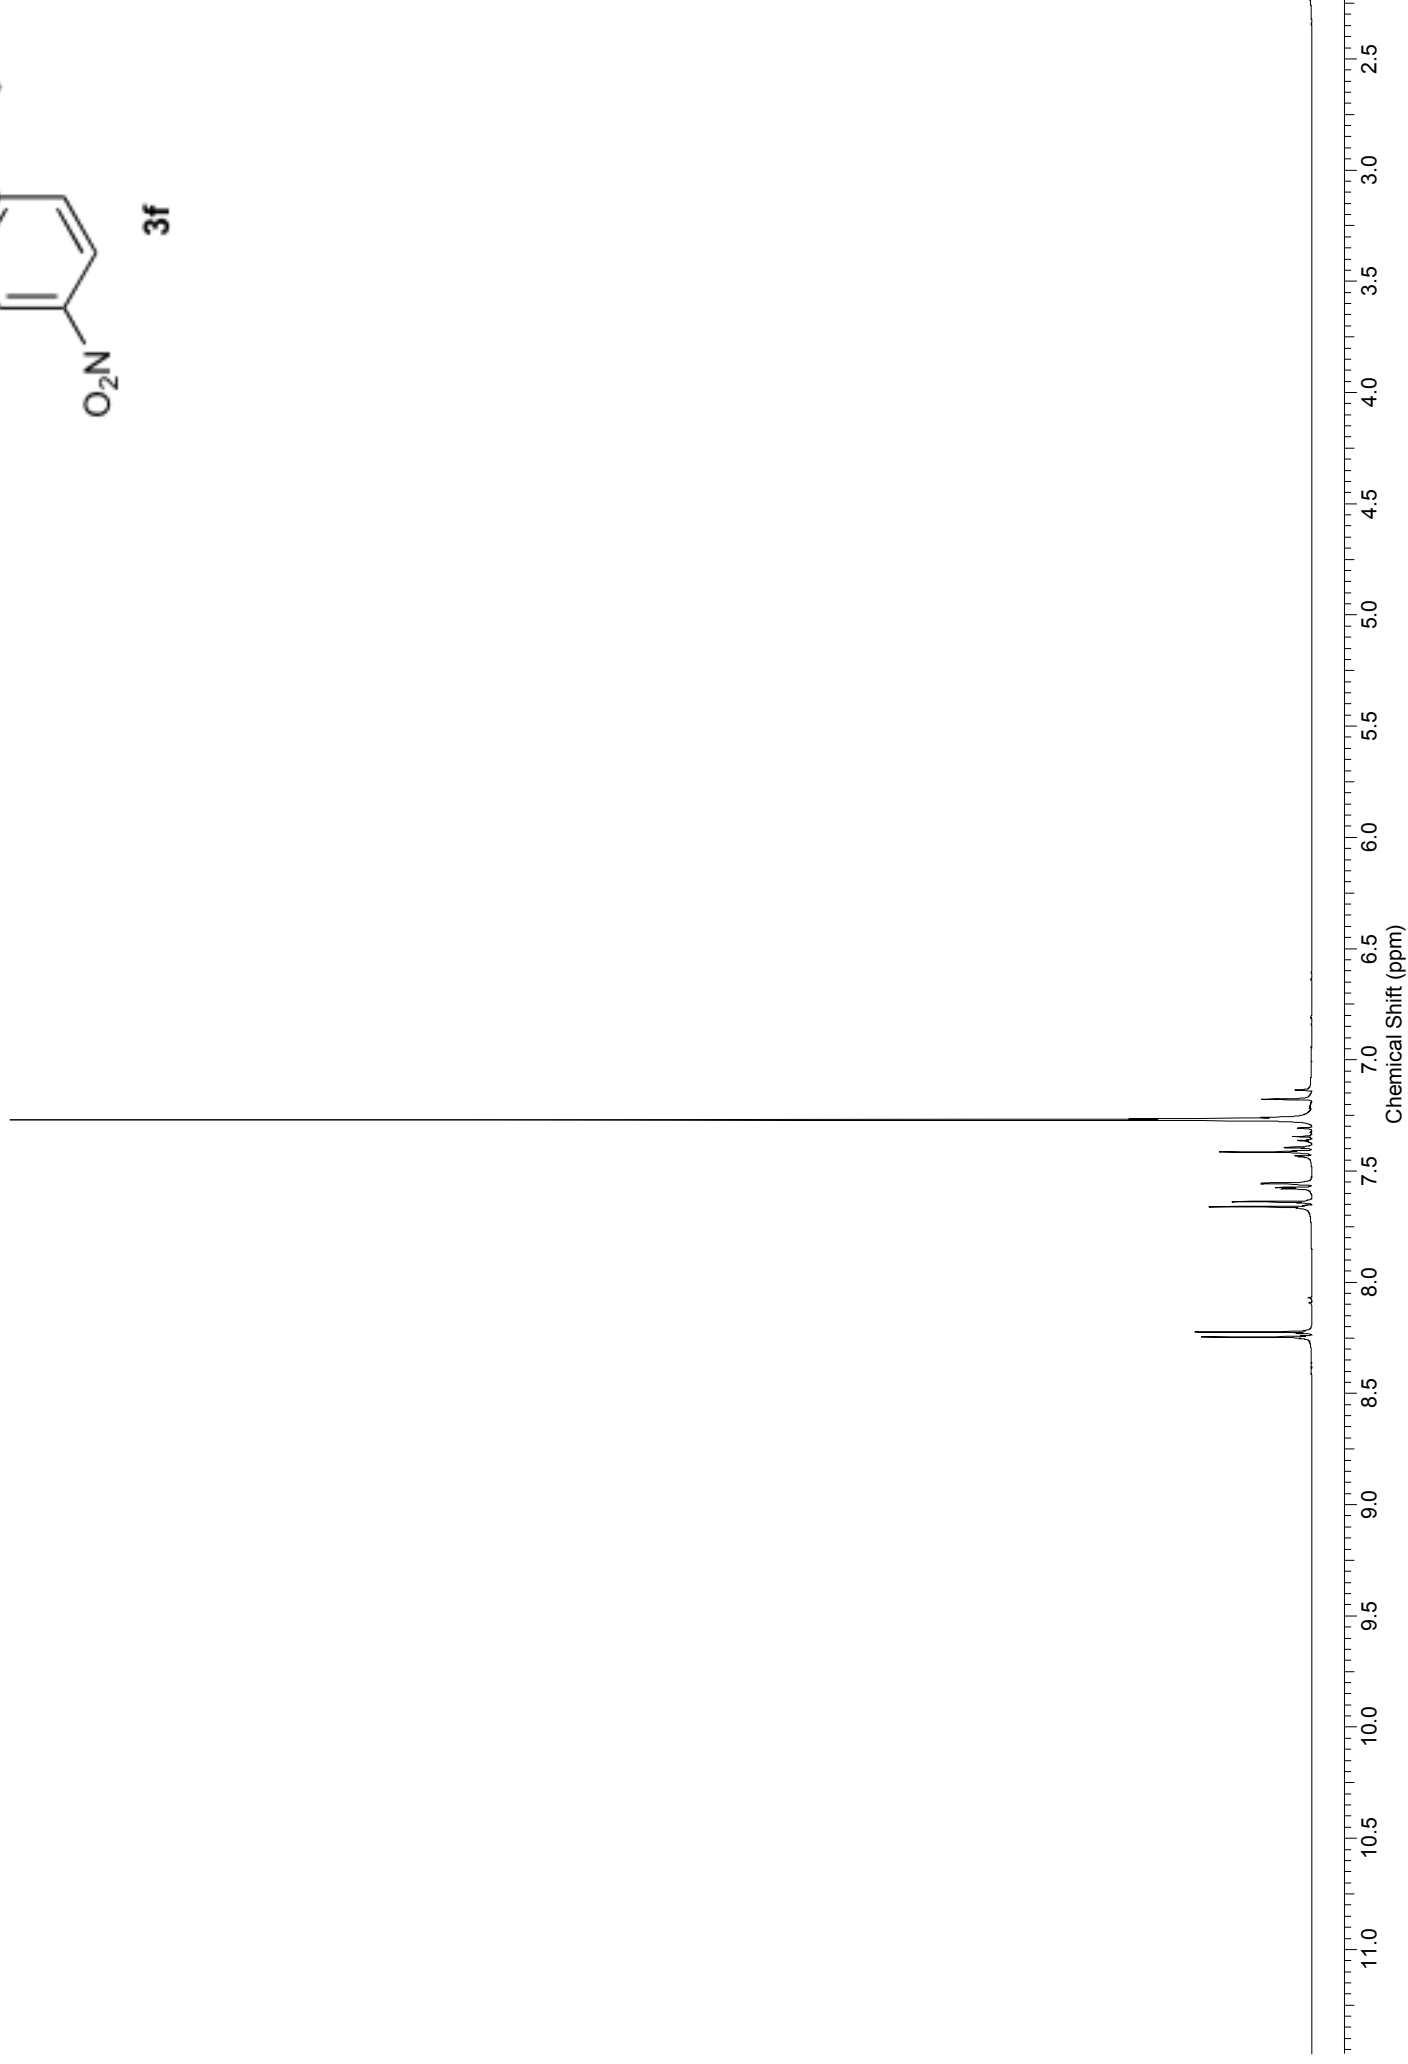

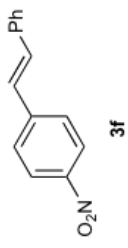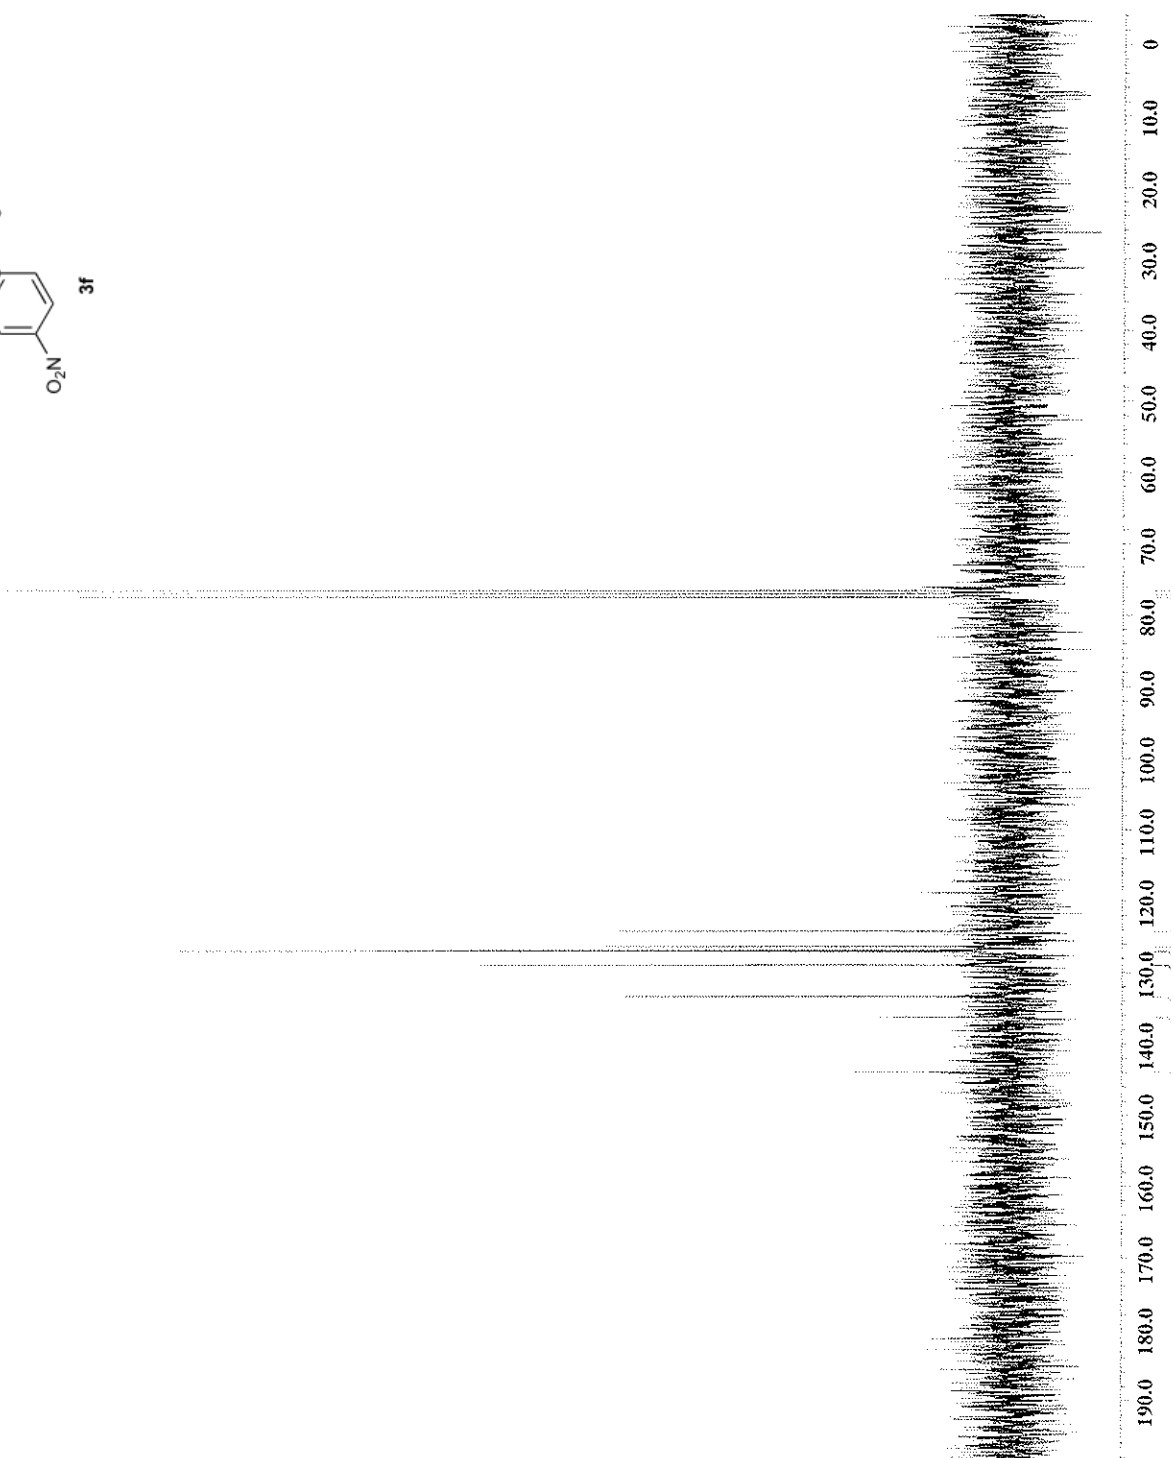

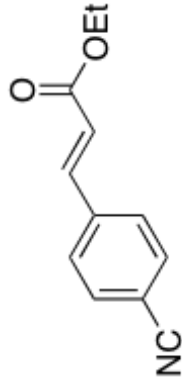

3g

7.6859  
7.6740  
7.6652  
7.6341  
7.6137  
7.5929

6.5313  
6.4912

4.3051  
4.2873  
4.2695  
4.2516

1.3581  
1.3403  
1.3225

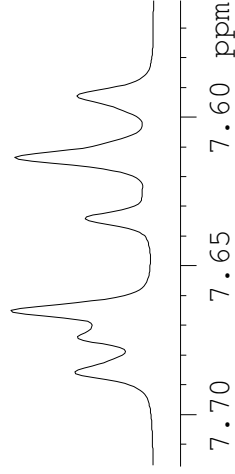

5.01

1.00

2.02

3.10

9 8 7 6 5 4 3 2 1 ppm

Current Data Parameters  
NAME TW 1-007-F1  
EXPNO 21  
PROCNO 1

F2 - Acquisition Parameters  
Date\_ 20151120  
Time 15.02  
INSTRUM spect  
PROBHD 5 mm PABBO BB/  
PULPROG zg30  
TD 65536  
SOLVENT CDCl3  
NS 16  
DS 2  
SWH 8223.685 Hz  
FIDRES 0.125483 Hz  
AQ 3.9845889 sec  
RG 81.67  
DW 60.800 usec  
DE 10.69 usec  
TE 293.7 K  
D1 2.0000000 sec  
TD0 1

===== CHANNEL f1 =====  
SF01 400.1324710 MHz  
NUC1 1H  
P1 8.00 usec  
PLW1 24.00000000 W

F2 - Processing parameters  
SI 32768  
SF 400.1300087 MHz  
WDW EM  
SSB 0  
LB 0.30 Hz  
GB 0  
PC 1.50

Current Data Parameters  
NAME TW 1-007-F1  
EXPNO 22  
PROCNO 1

F2 - Acquisition Parameters  
Date\_ 20151121  
Time 1.39  
INSTRUM spect  
PROBHD 5 mm PABBO BB/  
PULPROG zgpg30  
TD 65536  
SOLVENT CDCl3  
NS 256  
DS 4  
SWH 24038.461 Hz  
FIDRES 0.366798 Hz  
AQ 1.3631488 sec  
RG 181.72  
DW 20.800 usec  
DE 8.18 usec  
TE 294.3 K  
D1 2.00000000 sec  
D11 0.03000000 sec  
TD0 1

===== CHANNEL f1 =====  
SFO1 100.6228303 MHz  
NUC1 13C  
P1 9.00 usec  
PLW1 77.00000000 W

===== CHANNEL f2 =====  
SFO2 400.1316005 MHz  
NUC2 1H  
CPDPRG2 waltz16  
PCPD2 90.00 usec  
PLW2 24.00000000 W  
PLW12 0.17567000 W  
PLW13 0.14229999 W

F2 - Processing parameters  
SI 65536  
SF 100.6127690 MHz  
WDW EM  
SSB 0  
LB 1.00 Hz  
GB 0  
PC 1.40

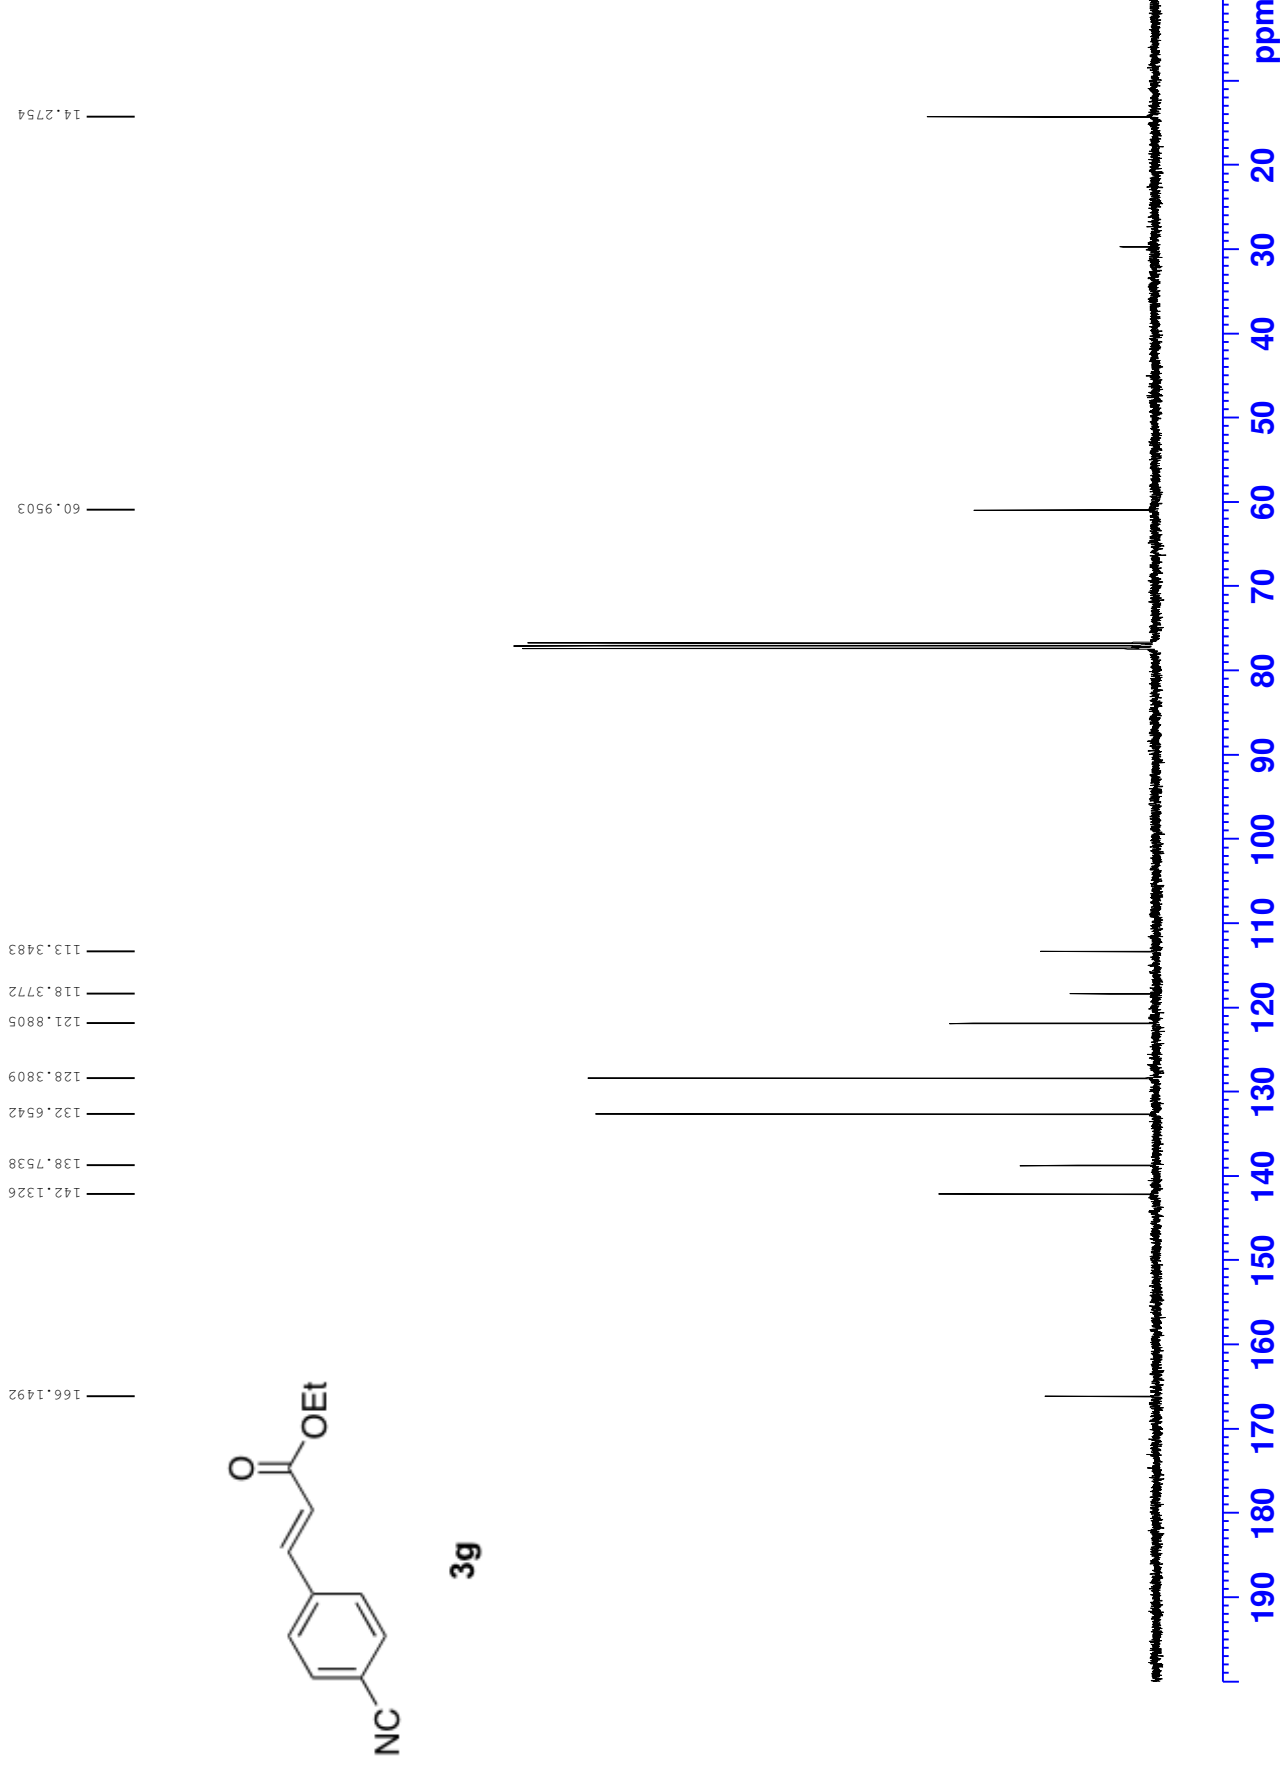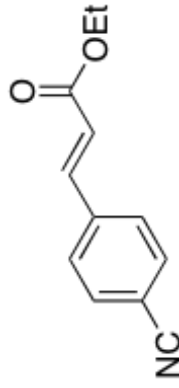

3g

Current Data Parameters  
NAME TW 1-010-F2  
EXPNO 20  
PROCNO 1

F2 - Acquisition Parameters  
Date\_ 20151120  
Time 16.02  
INSTRUM spect  
PROBHD 5 mm PABBO BB/  
PULPROG zg30  
TD 65536  
SOLVENT CDCl3  
NS 16  
DS 2  
SWH 8223.685 Hz  
FIDRES 0.125483 Hz  
AQ 3.9845889 sec  
RG 46.39  
DW 60.800 usec  
DE 10.69 usec  
TE 293.8 K  
D1 2.0000000 sec  
TD0 1

===== CHANNEL f1 =====  
SFO1 400.1324710 MHz  
NUC1 1H  
P1 8.00 usec  
PLW1 24.00000000 W

F2 - Processing parameters  
SI 32768  
SF 400.1300087 MHz  
WDW EM  
SSB 0  
LB 0.30 Hz  
GB 0  
PC 1.50

1.3527  
1.3349  
1.3170

4.2980  
4.2802  
4.2623  
4.2445

6.5567  
6.5167

7.8967  
7.8764  
7.7127  
7.6720  
7.6513

10.0147

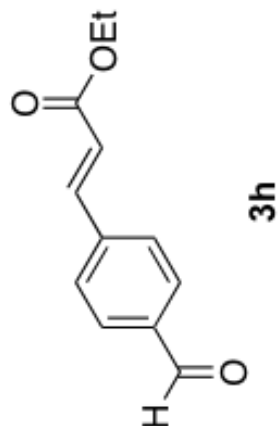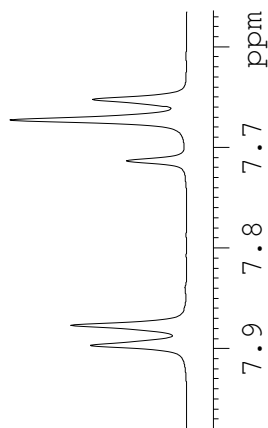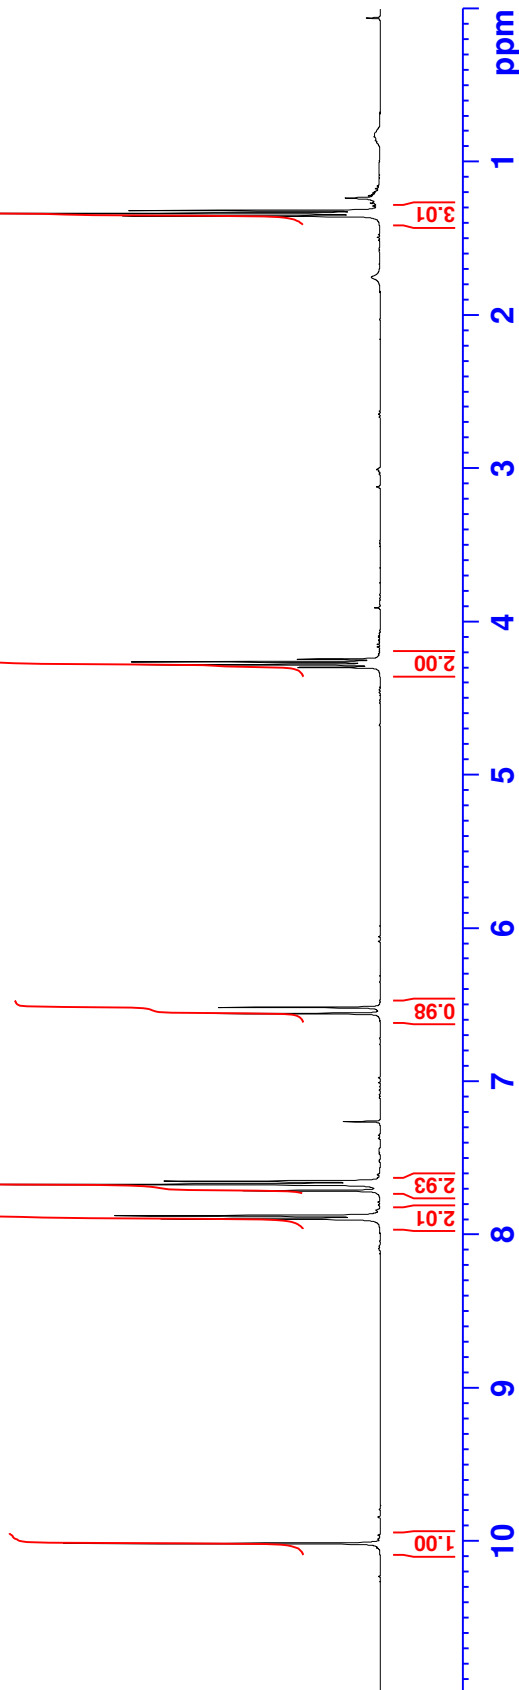

Current Data Parameters  
NAME TW 1-010-F2  
EXPNO 22  
PROCNO 1

F2 - Acquisition Parameters  
Date\_ 20151121  
Time 18.10  
INSTRUM spect  
PROBHD 5 mm PABBO BB/  
PULPROG zgpg30  
TD 65536  
SOLVENT CDCl3  
NS 256  
DS 4  
SWH 24038.461 Hz  
FIDRES 0.366798 Hz  
AQ 1.3631488 sec  
RG 181.72  
DW 20.800 usec  
DE 8.18 usec  
TE 294.1 K  
D1 2.00000000 sec  
D11 0.03000000 sec  
TD0 1

===== CHANNEL f1 =====  
SFO1 100.6228303 MHz  
NUC1 13C  
P1 9.00 usec  
PLW1 77.00000000 W

===== CHANNEL f2 =====  
SFO2 400.1316005 MHz  
NUC2 1H  
CPDPRG2 waltz16  
PCPD2 90.00 usec  
PLW2 24.00000000 W  
PLW12 0.17567000 W  
PLW13 0.14229999 W

F2 - Processing parameters  
SI 65536  
SF 100.6127690 MHz  
WDW EM  
SSB 0  
LB 1.00 Hz  
GB 0  
PC 1.40

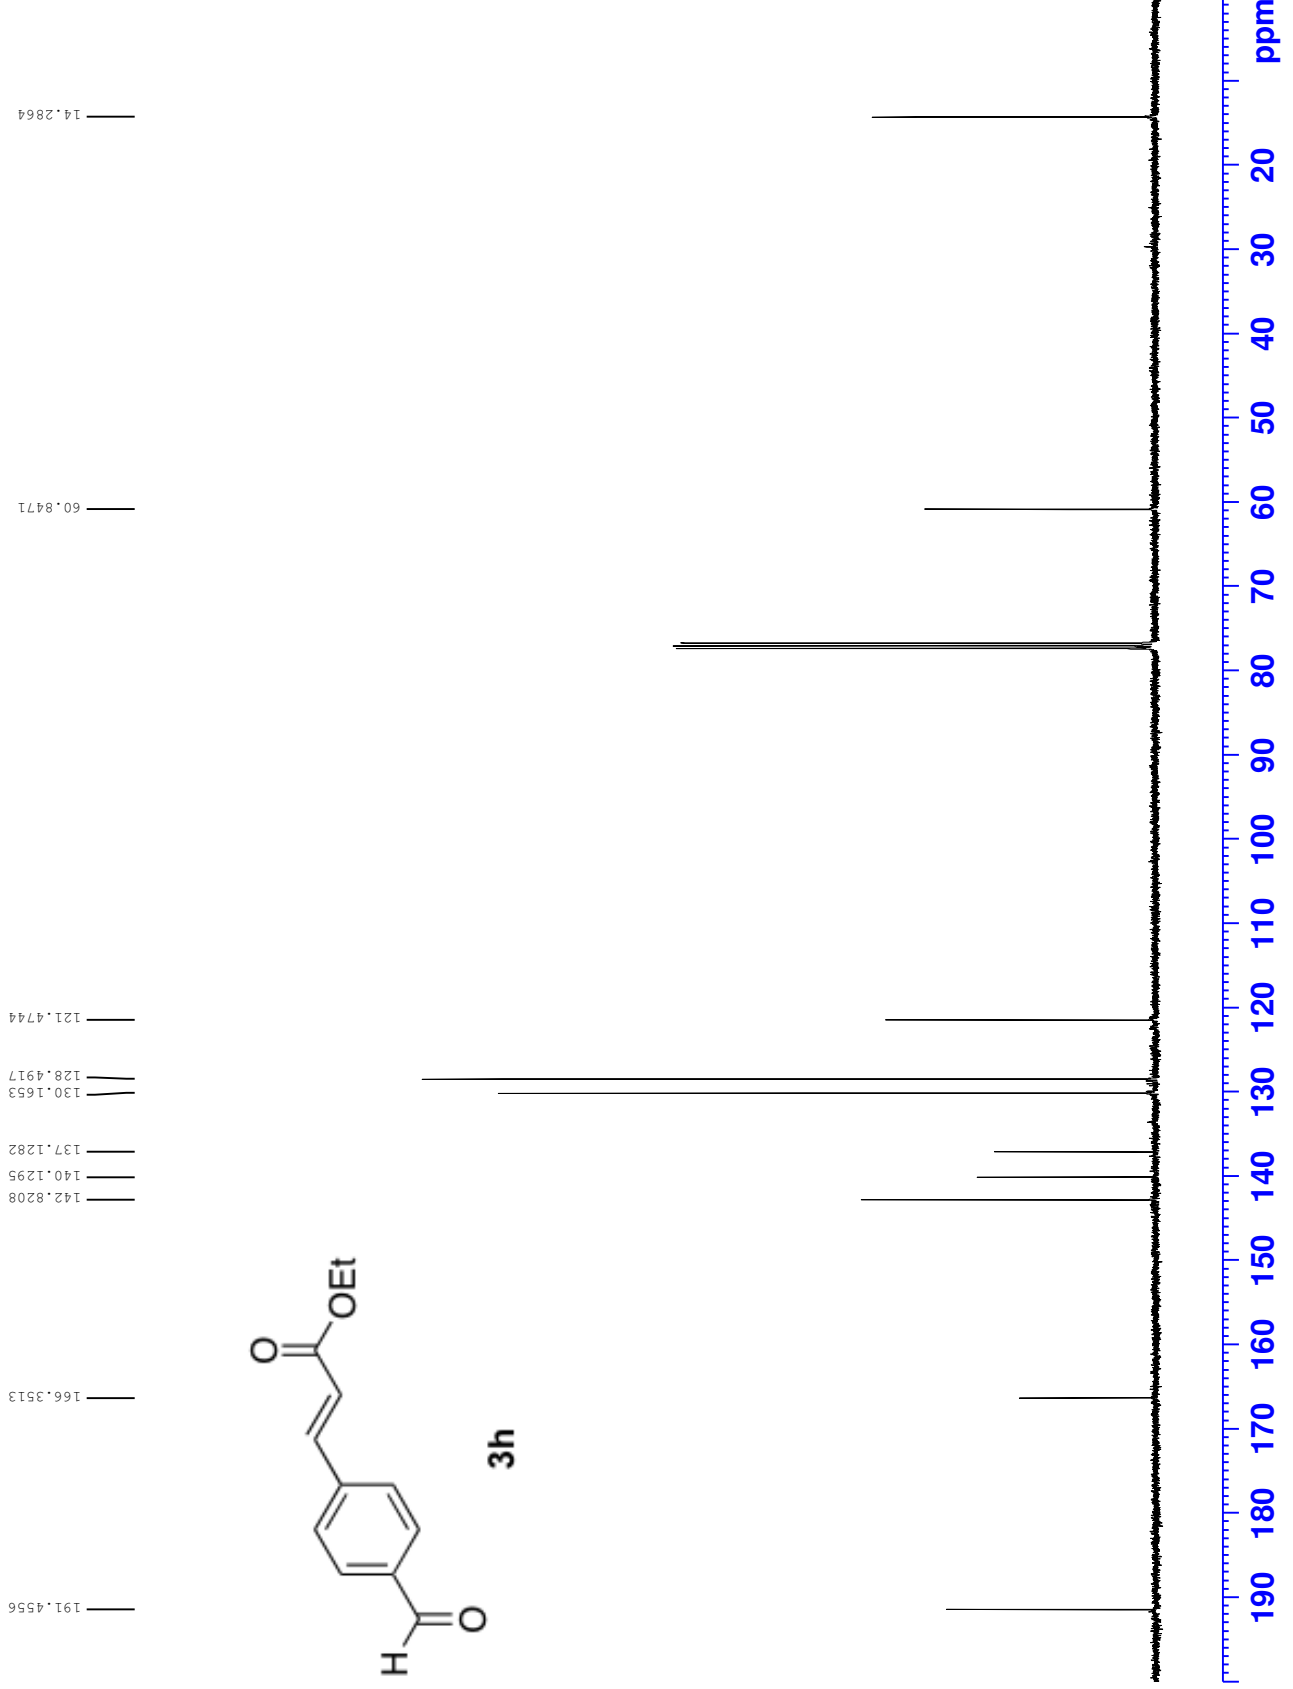

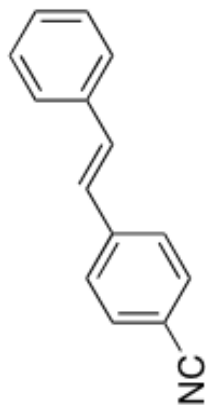

**3i**

7.6319  
7.6110  
7.5762  
7.5543  
7.5486  
7.5299  
7.4208  
7.4029  
7.3837  
7.3513  
7.3332  
7.3150  
7.2321  
7.1912  
7.1024  
7.0615

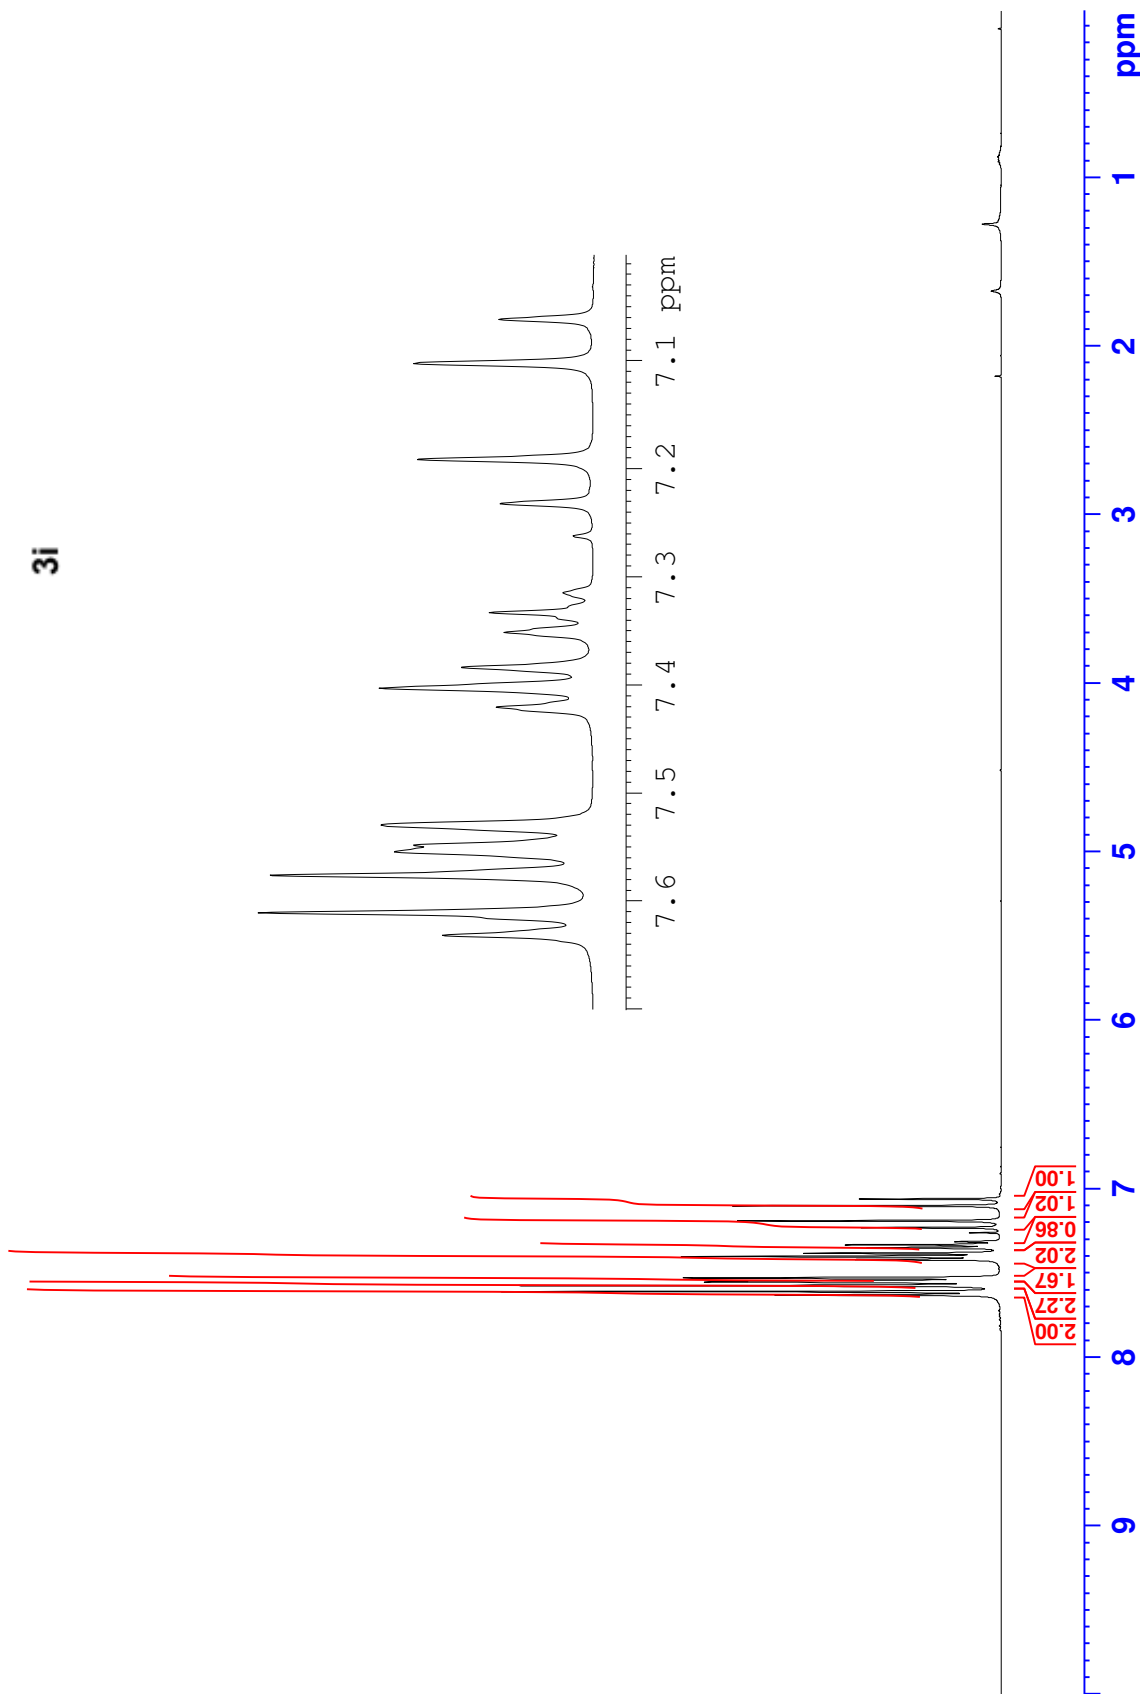

Current Data Parameters  
NAME TW 1-009  
EXPNO 10  
PROCNO 1

F2 - Acquisition Parameters  
Date\_ 20151117  
Time 10.57  
INSTRUM spect  
PROBHD 5 mm PABBO BB/  
PULPROG zg30  
TD 65536  
SOLVENT CDC13  
NS 16  
DS 2  
SWH 8223.685 Hz  
FIDRES 0.125483 Hz  
AQ 3.9845889 sec  
RG 35.7  
DW 60.800 usec  
DE 10.69 usec  
TE 293.9 K  
D1 2.0000000 sec  
TD0 1

===== CHANNEL f1 =====  
SF01 400.1324710 MHz  
NUC1 1H  
P1 8.00 usec  
PLW1 24.00000000 W

F2 - Processing parameters  
SI 32768  
SF 400.1300087 MHz  
WDW EM  
SSB 0  
LB 0.30 Hz  
GB 0  
PC 1.50

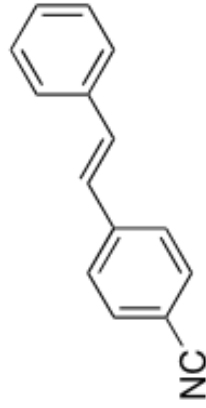

3i

Current Data Parameters  
 NAME TW 1-009  
 EXPNO 11  
 PROCNO 1

F2 - Acquisition Parameters  
 Date\_ 20151119  
 Time 2.23  
 INSTRUM spect  
 PROHD 5 mm PABBO BB/  
 PULPROG zgpg30  
 TD 65536  
 SOLVENT CDCl3  
 NS 256  
 DS 4  
 SWH 24038.461 Hz  
 FIDRES 0.366798 Hz  
 AQ 1.3631488 sec  
 RG 181.72  
 DW 20.800 usec  
 DE 8.18 usec  
 TE 294.3 K  
 D1 2.00000000 sec  
 D11 0.03000000 sec  
 TD0 1

===== CHANNEL f1 =====  
 SF01 100.6228303 MHz  
 NUC1 13C  
 P1 9.00 usec  
 PLW1 77.00000000 W

===== CHANNEL f2 =====  
 SF02 400.1316005 MHz  
 NUC2 1H  
 CPDPRG2 waltz16  
 PCPD2 90.00 usec  
 PLW2 24.00000000 W  
 PLW12 0.17567000 W  
 PLW13 0.14229999 W

F2 - Processing parameters  
 SI 65536  
 SF 100.6127690 MHz  
 WDW EM  
 SSB 0  
 LB 1.00 Hz  
 GB 0  
 PC 1.40

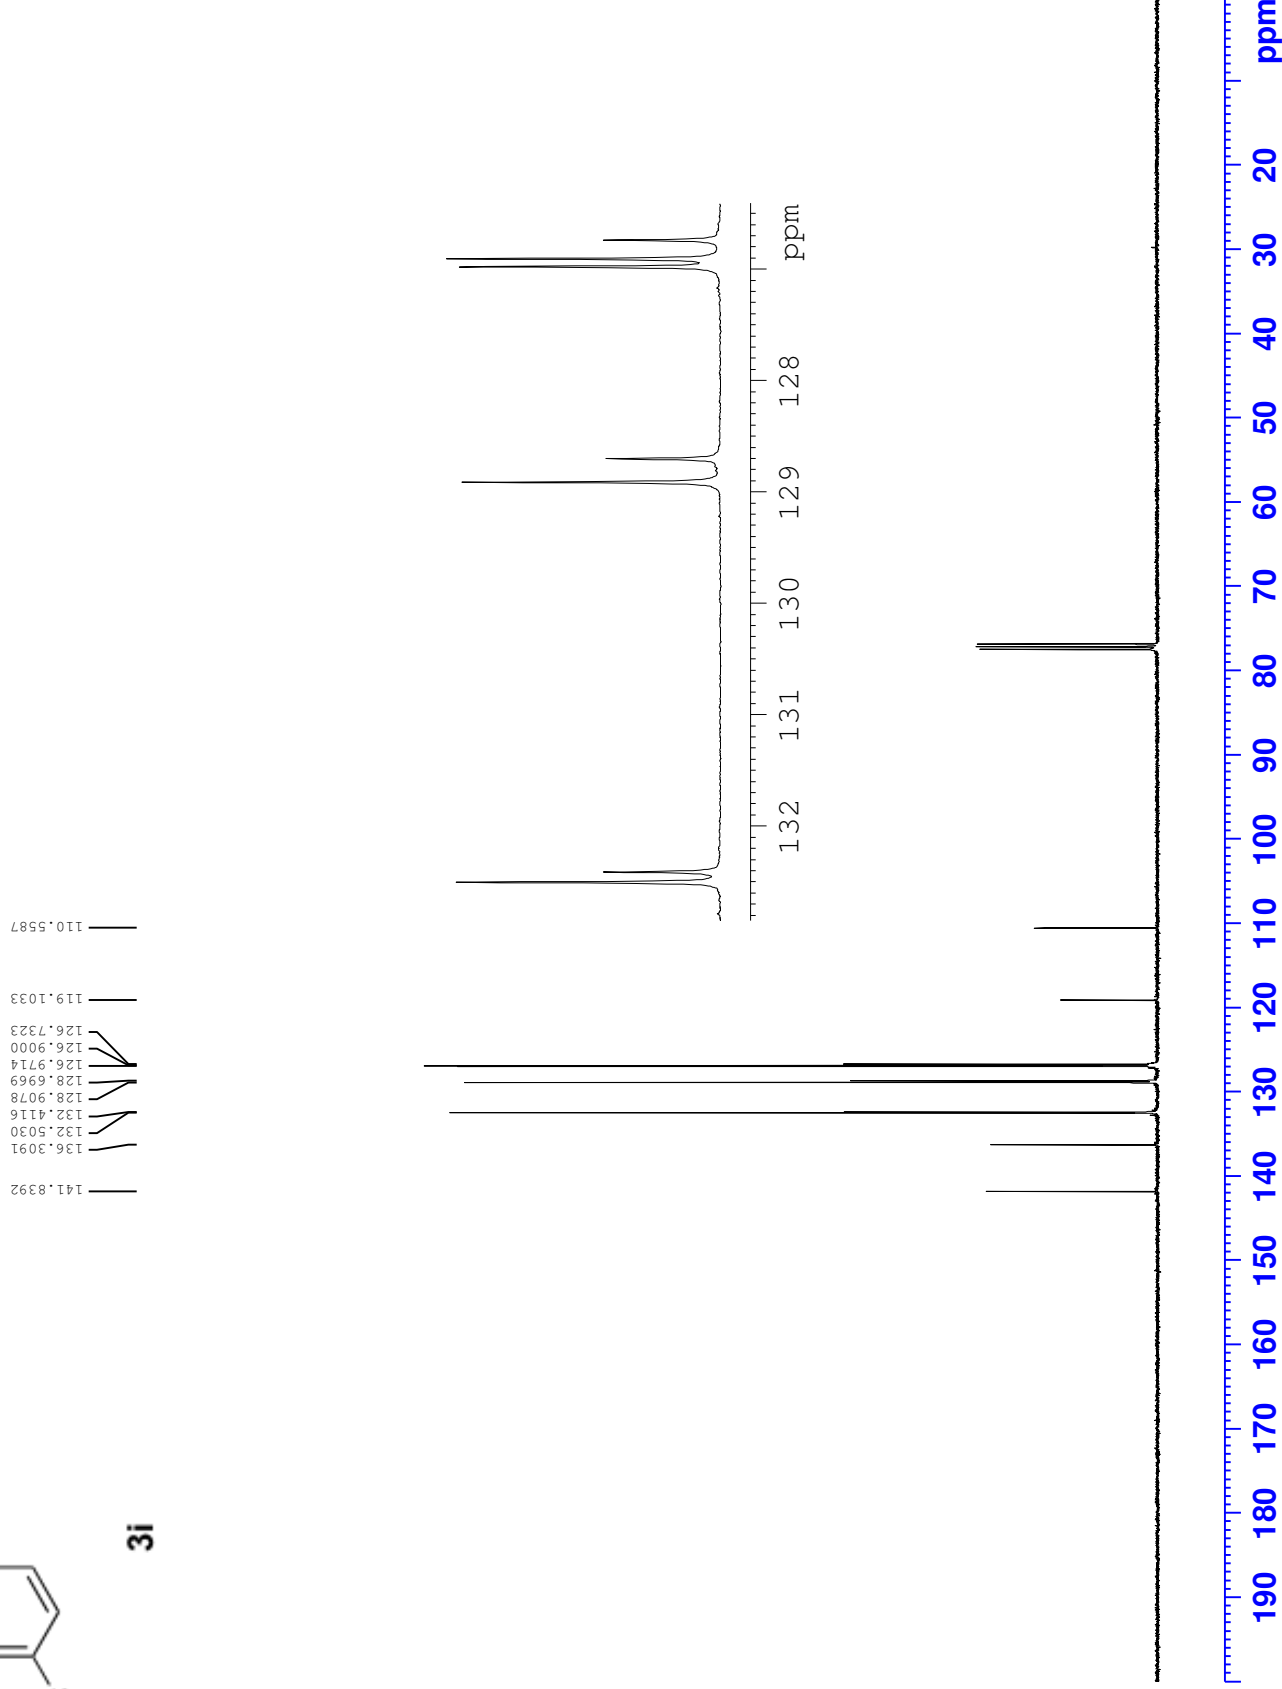

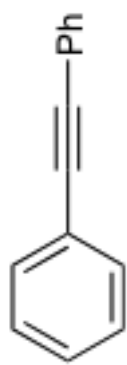

6a

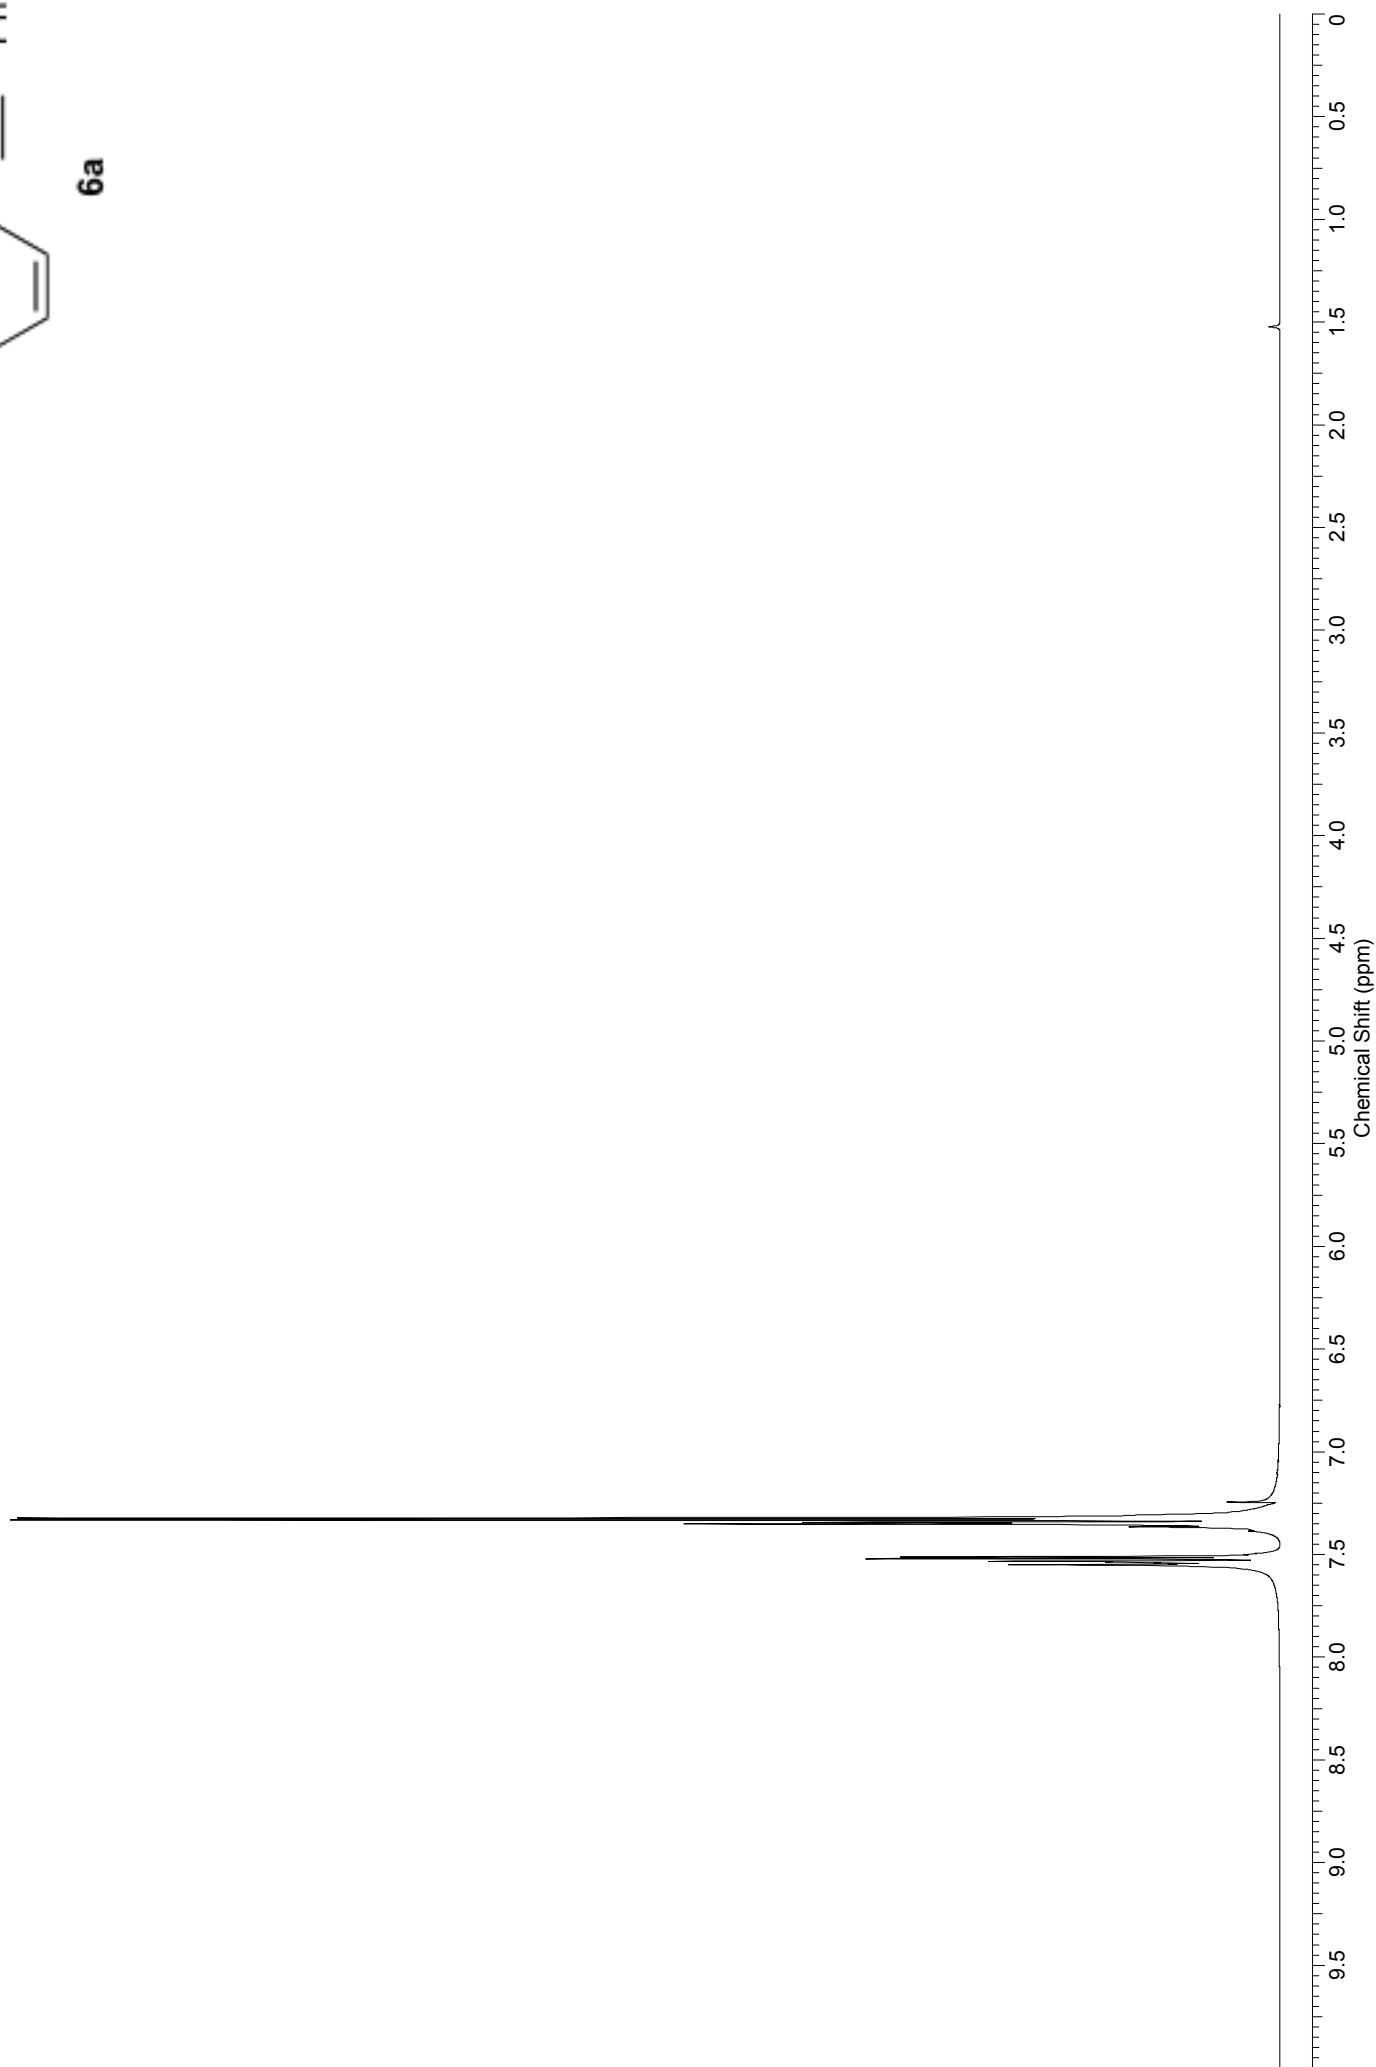

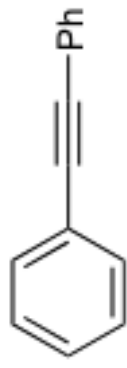

**6a**

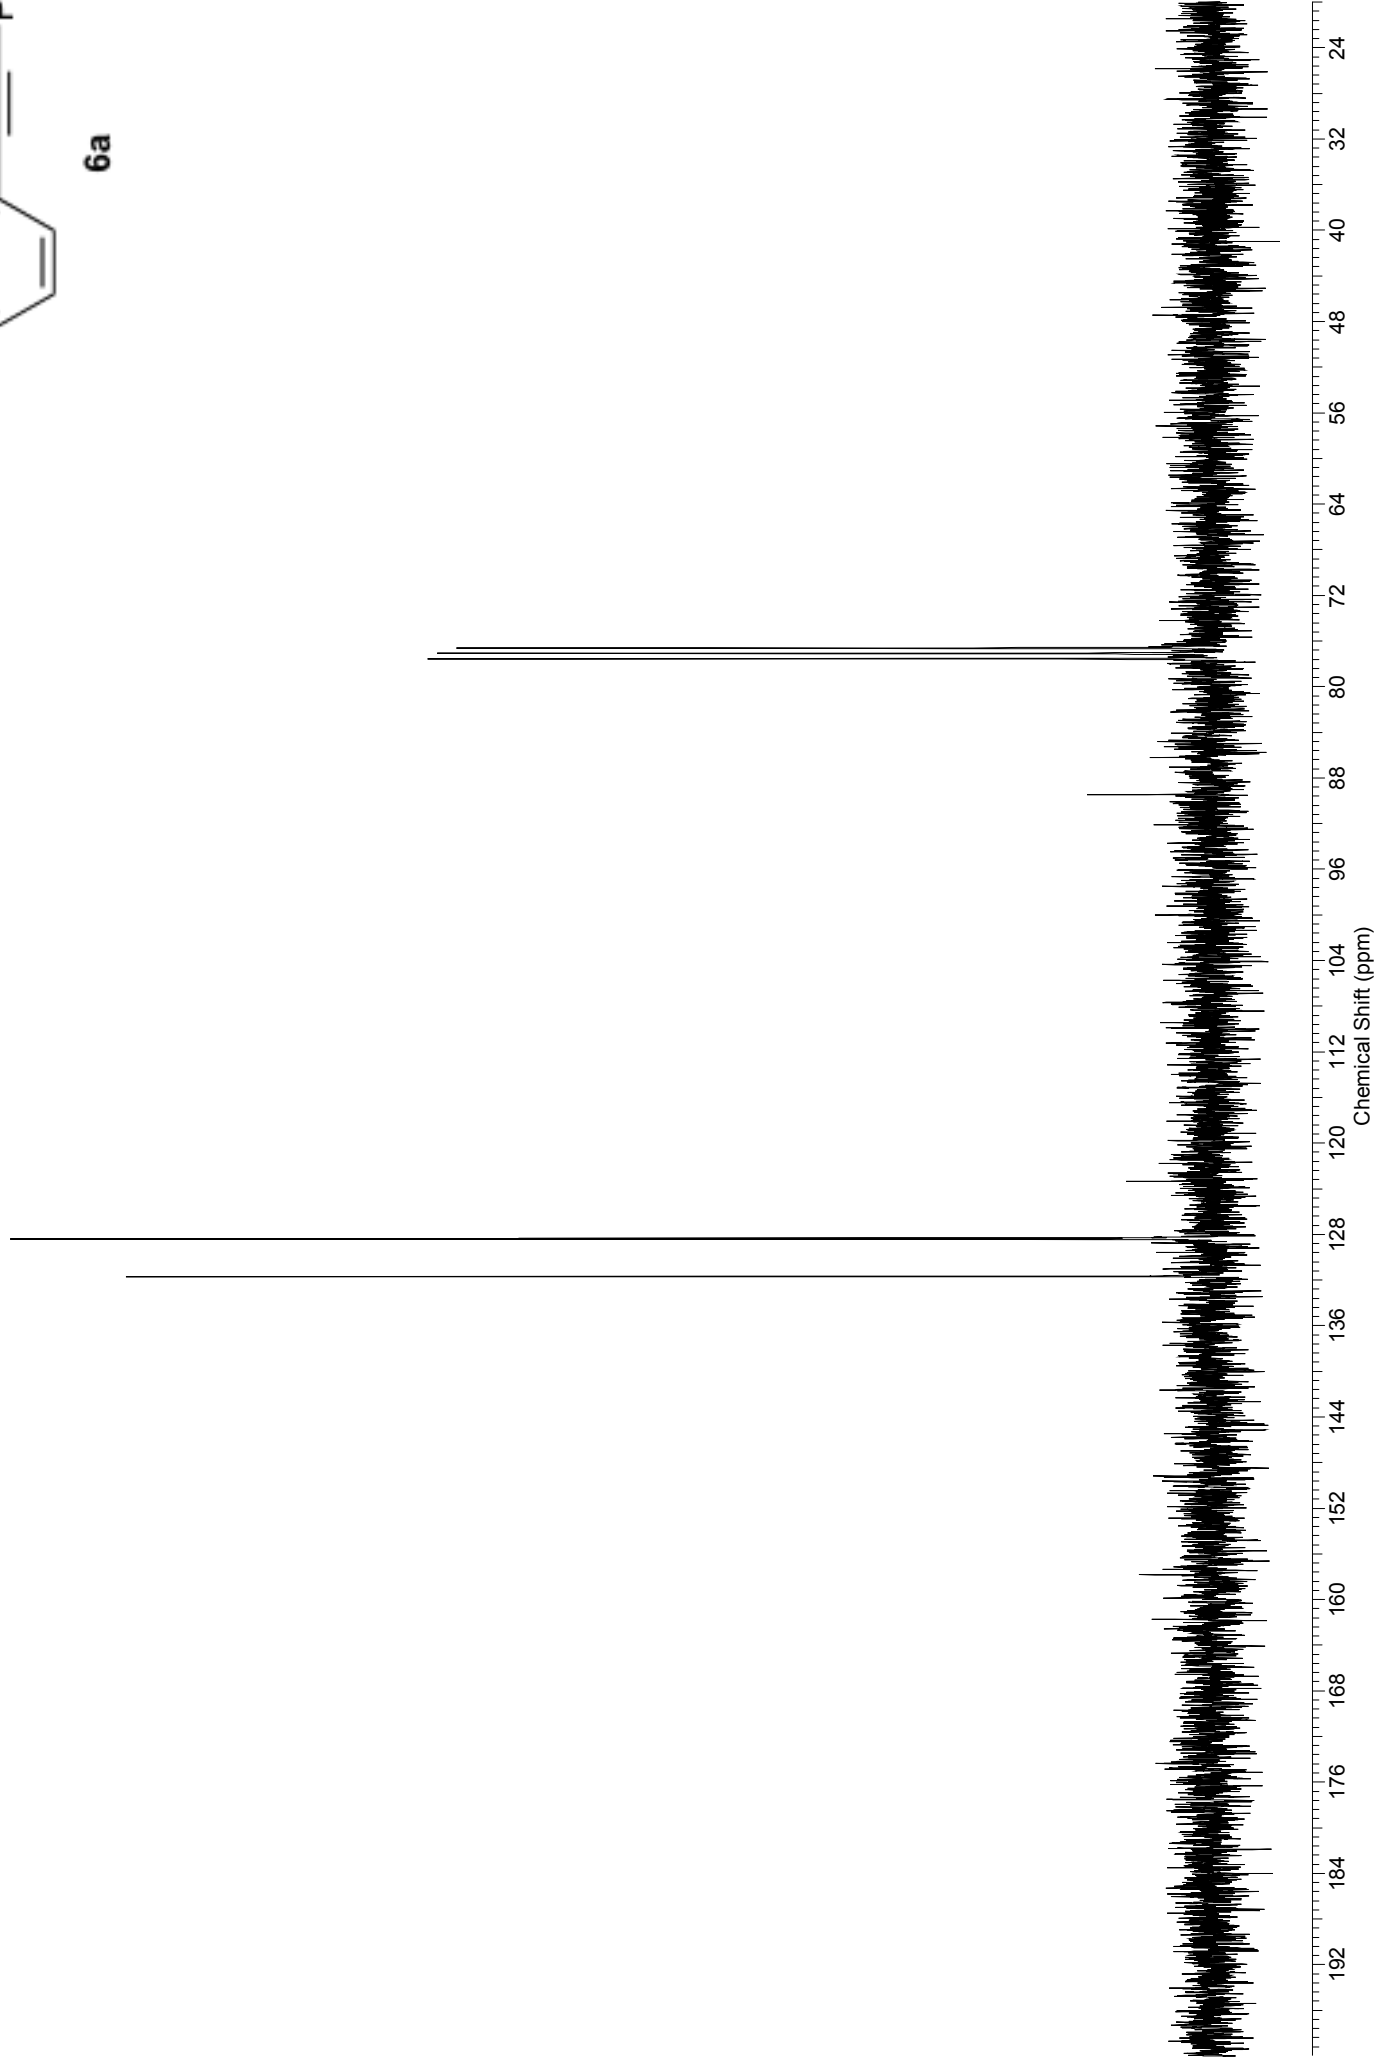

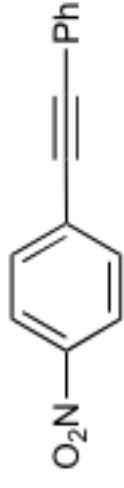

**6b**

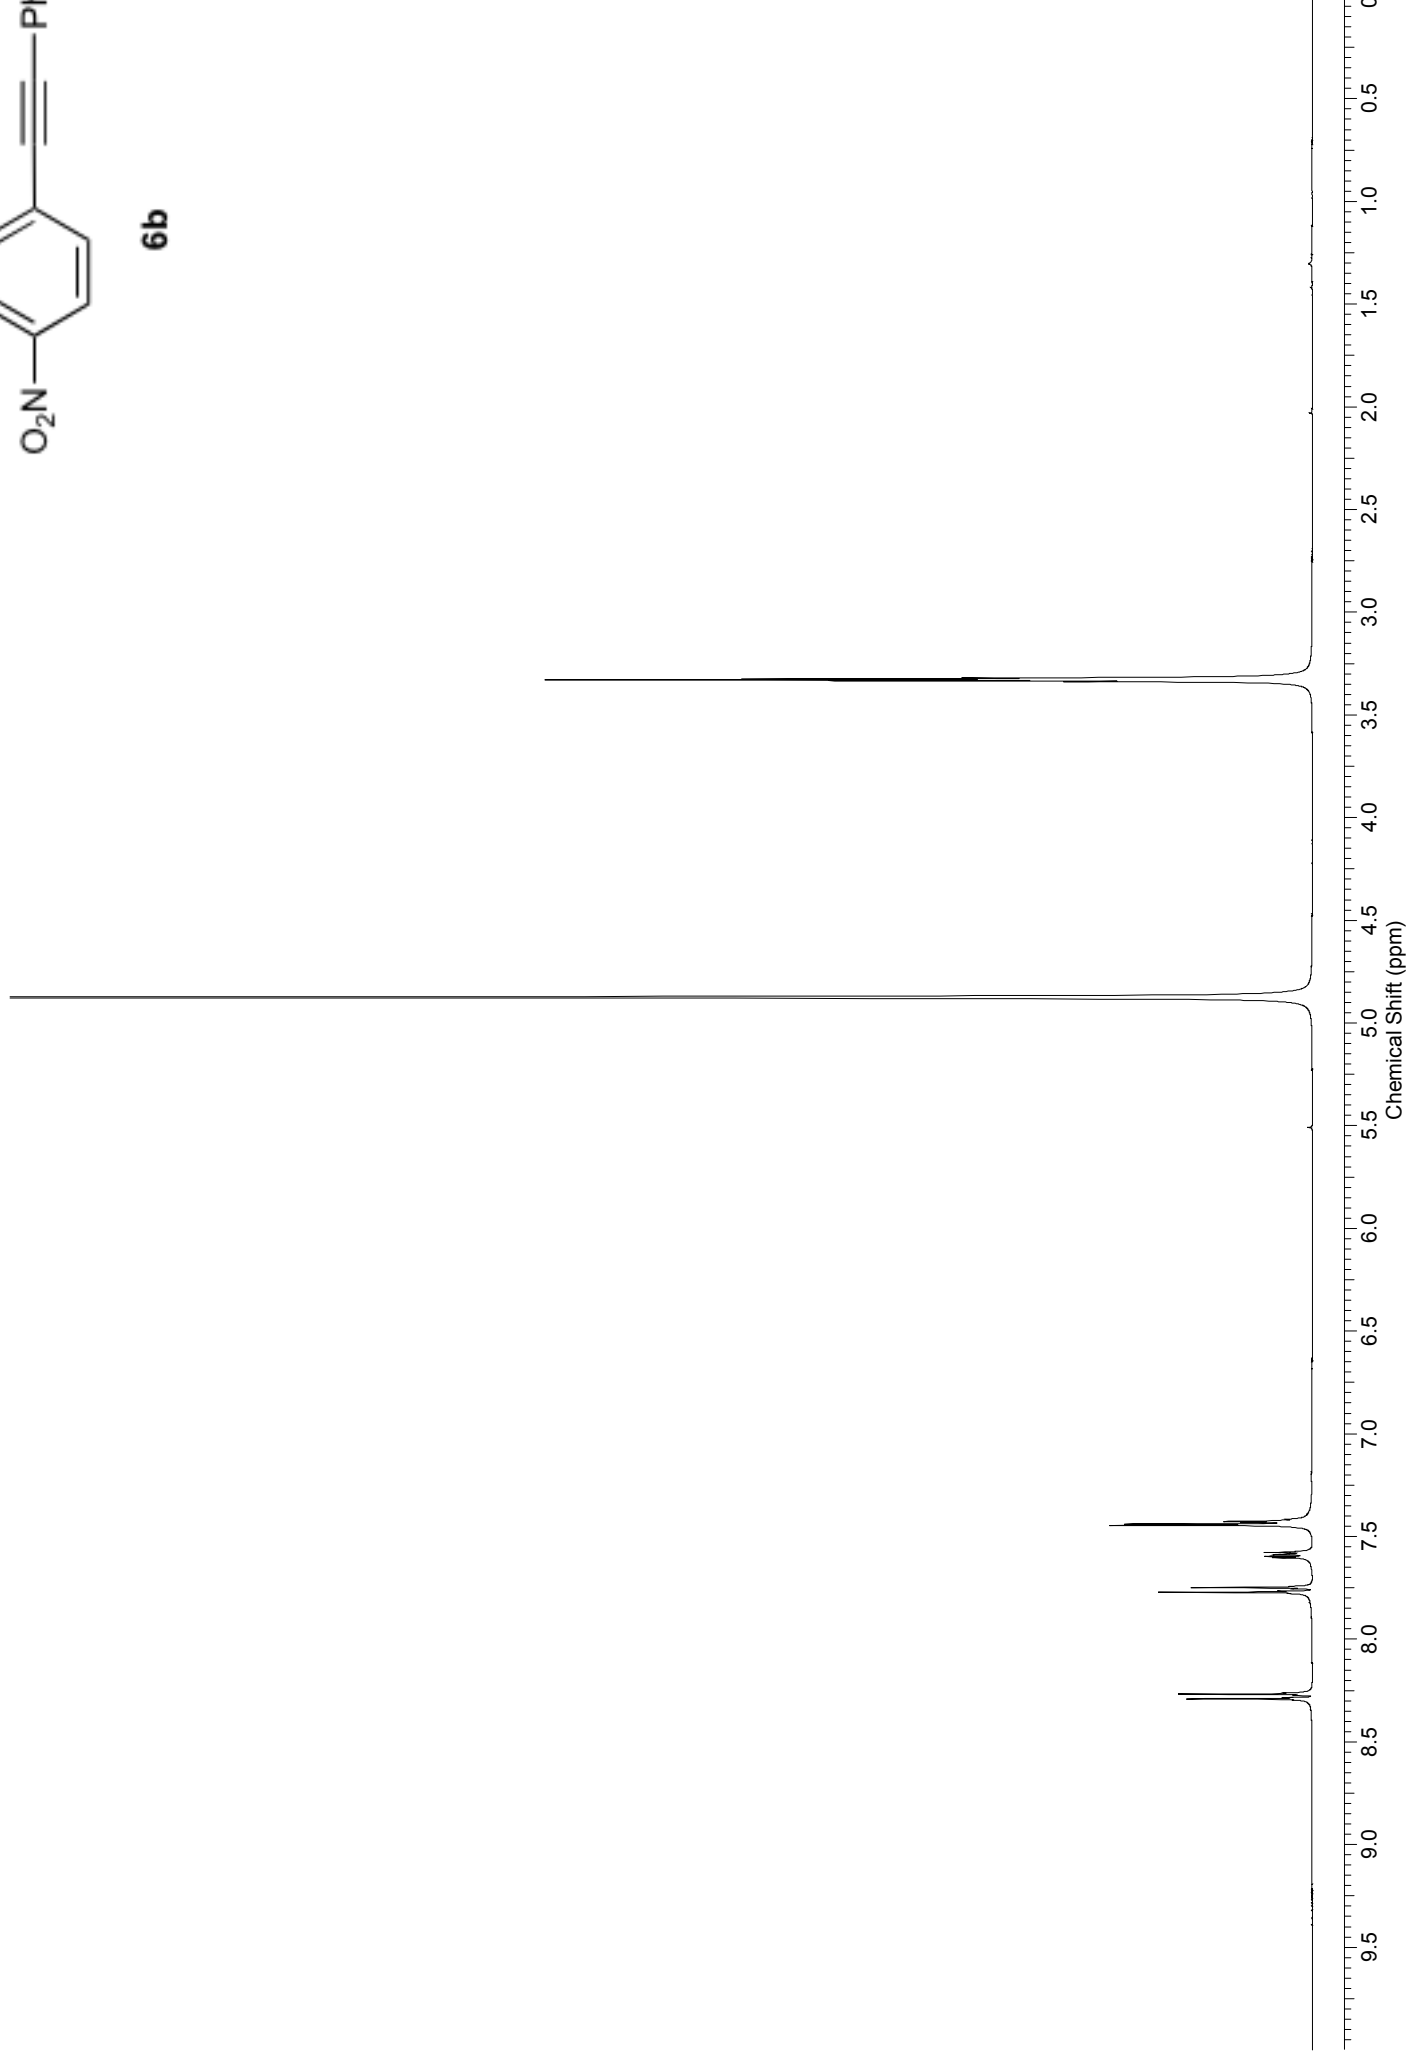

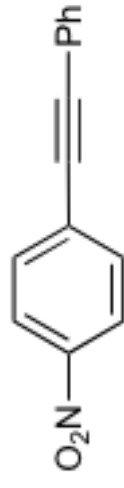

**6b**

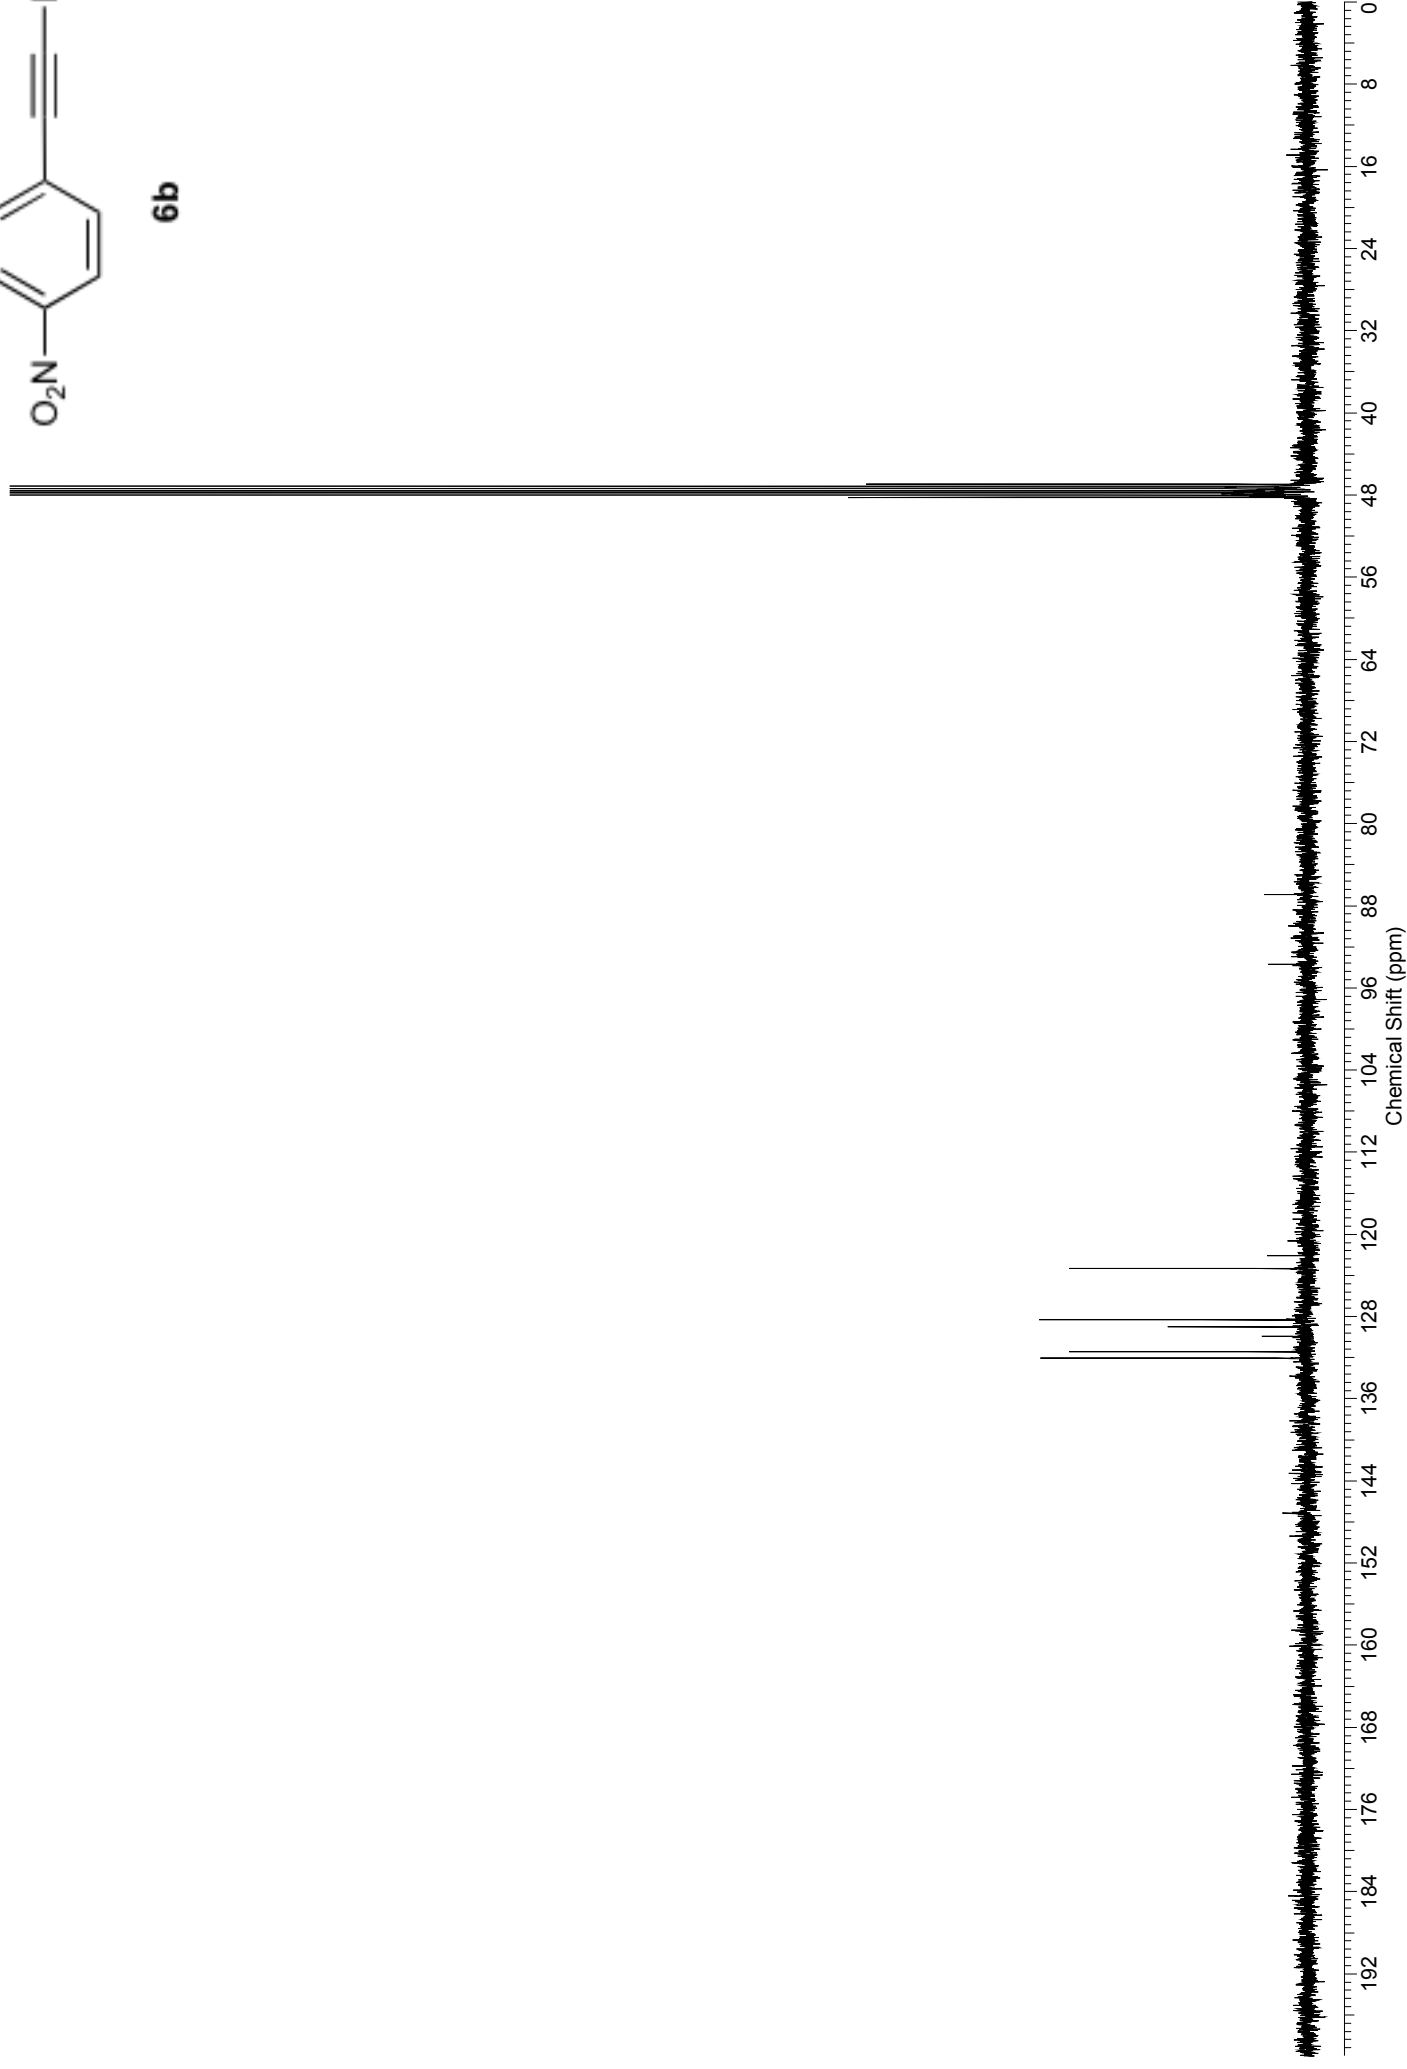

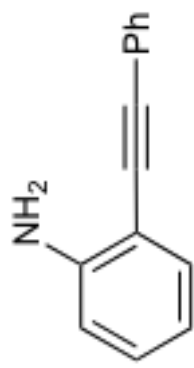

**6c**

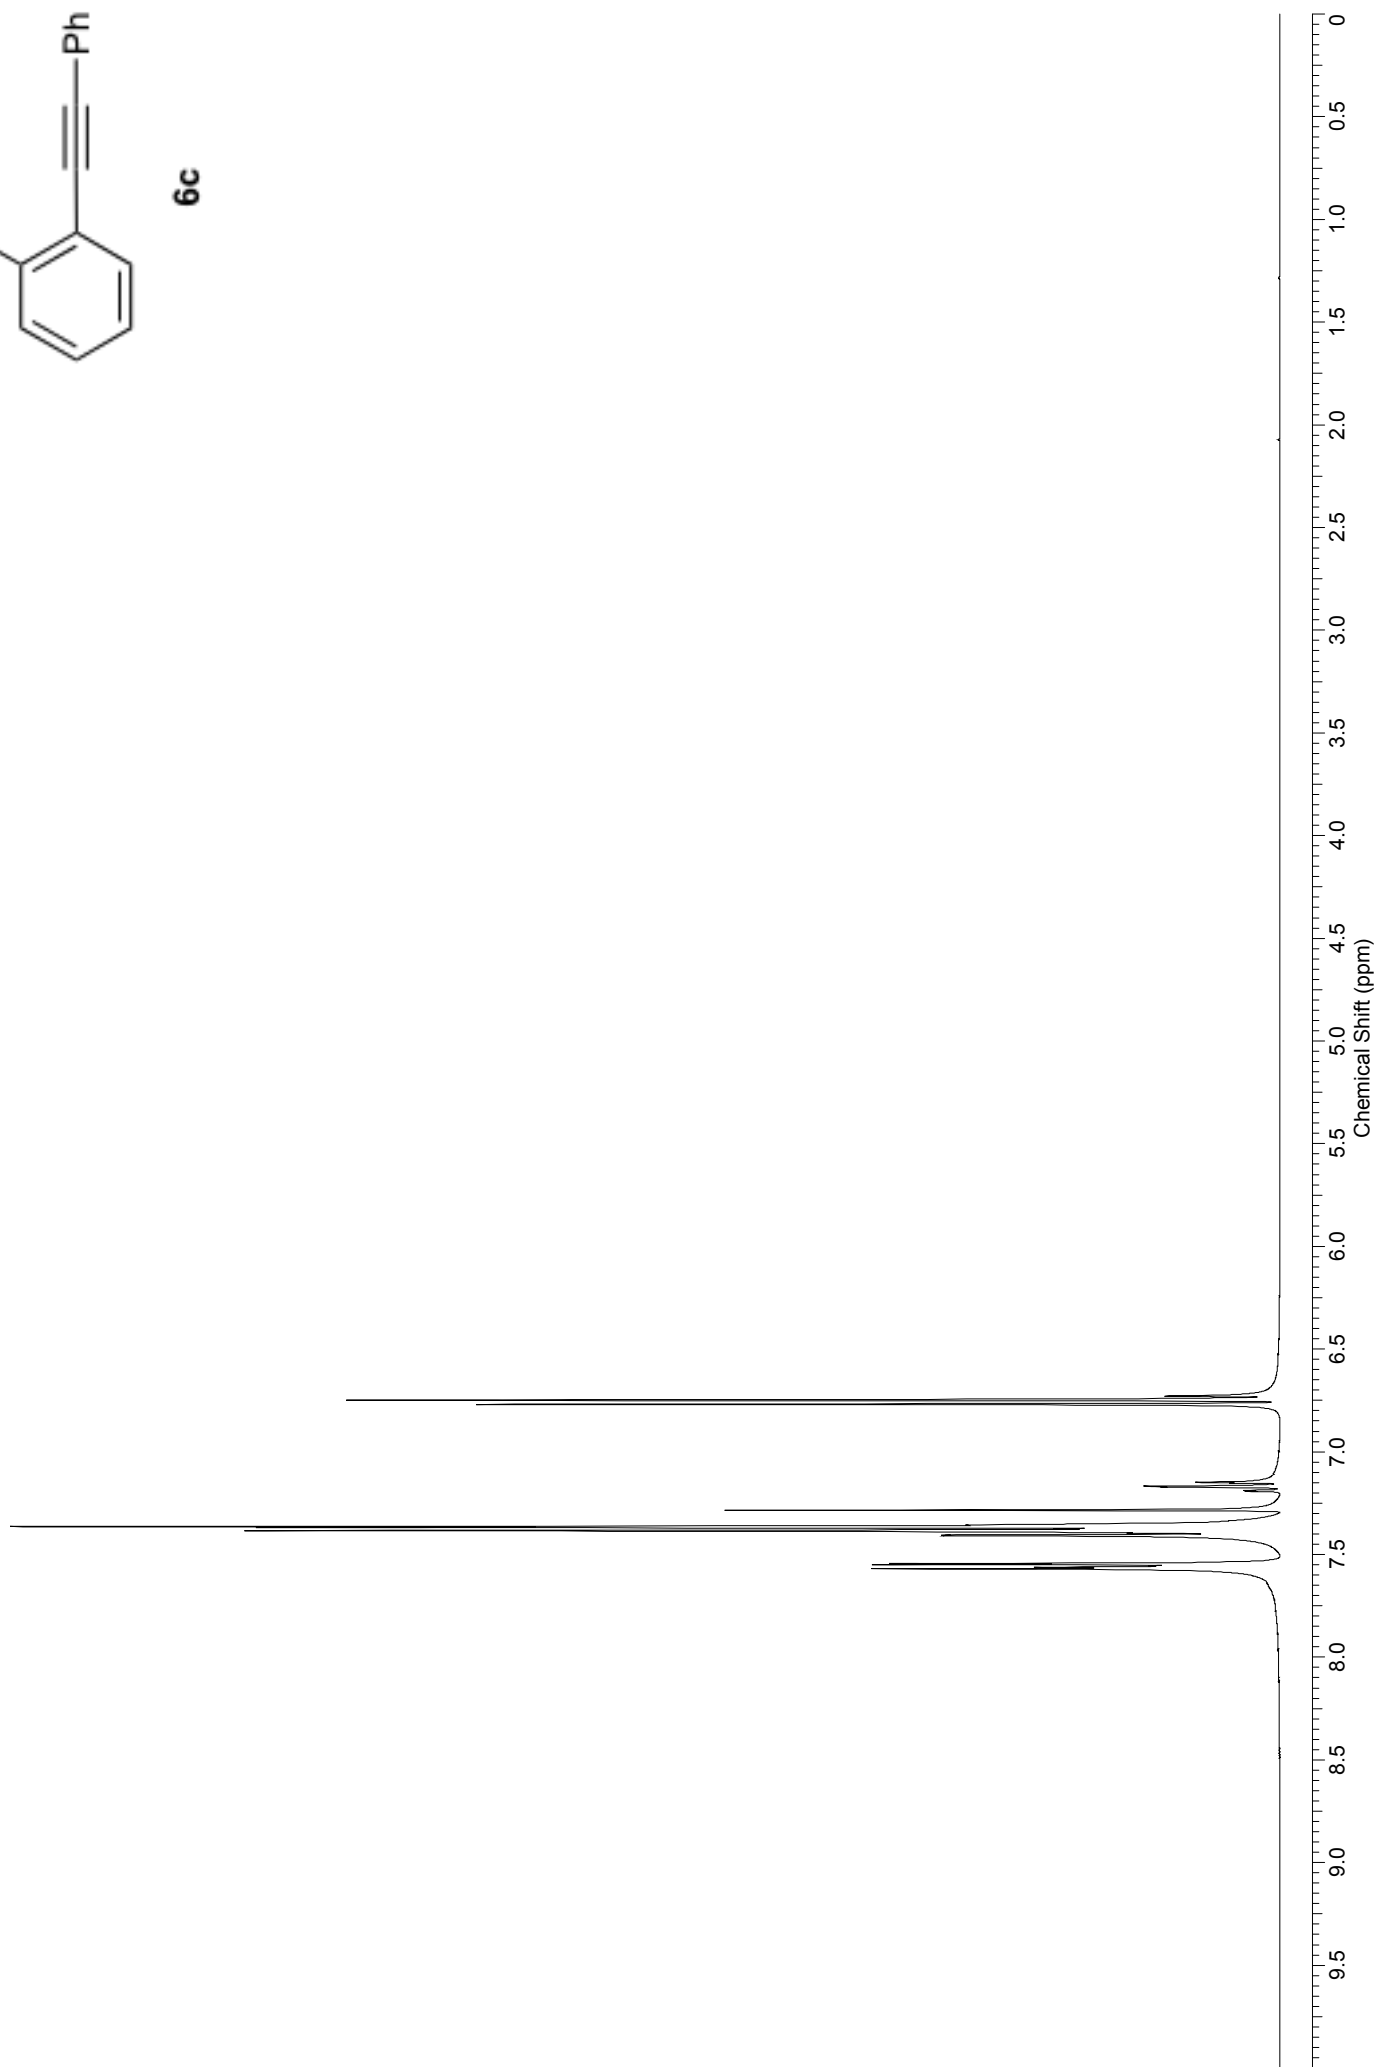

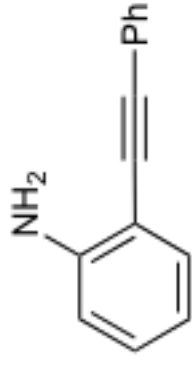

**6c**

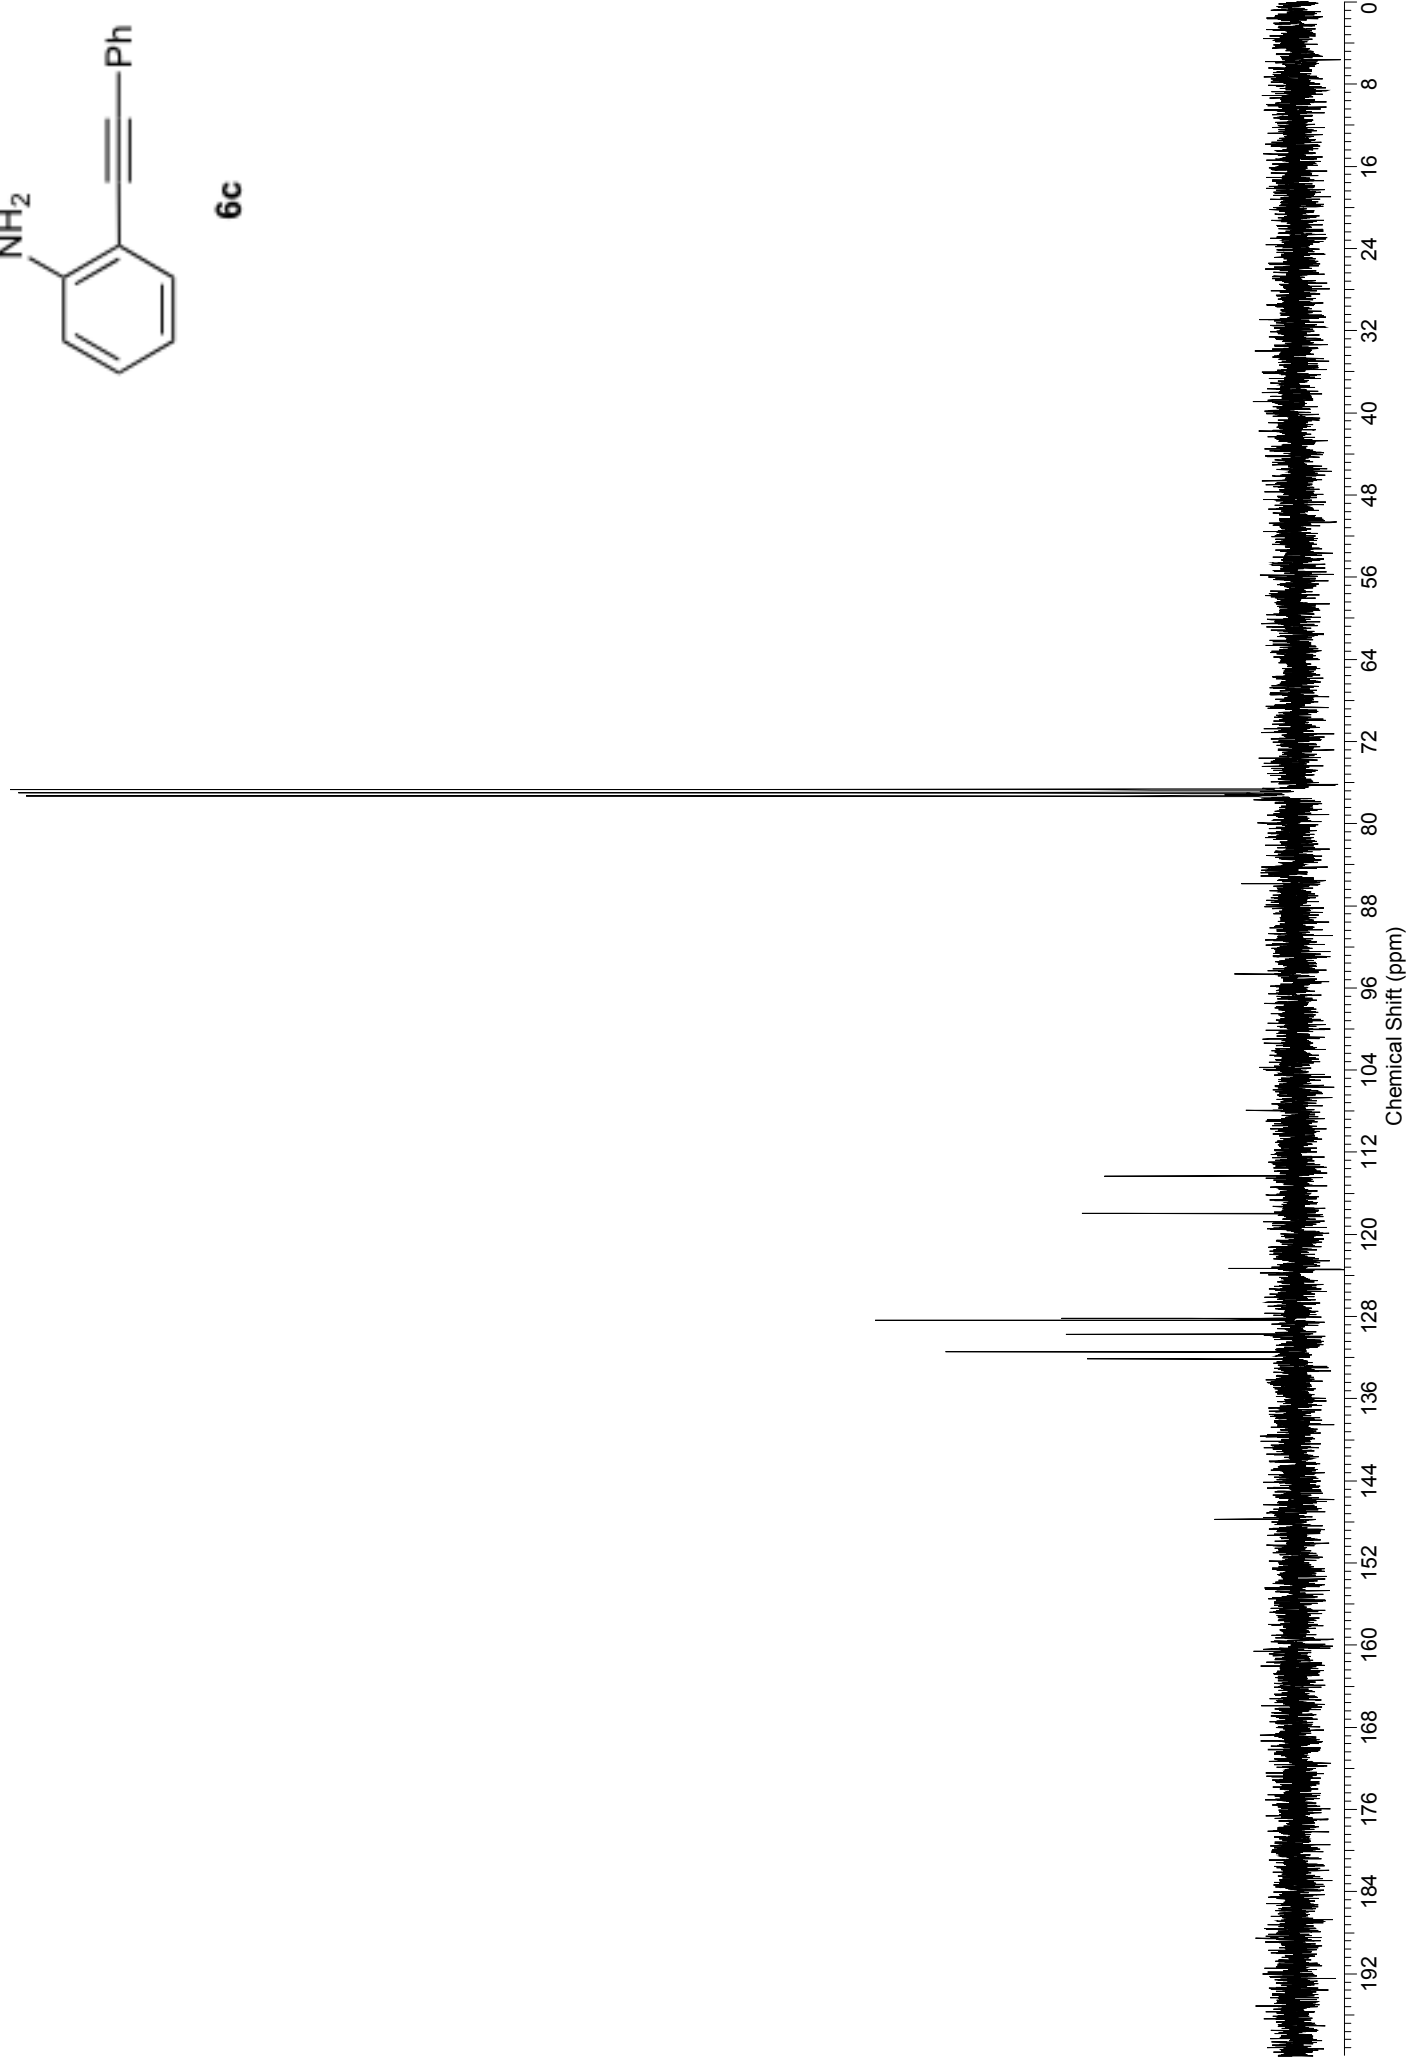

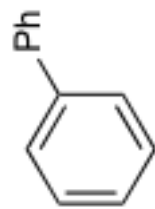

**7a**

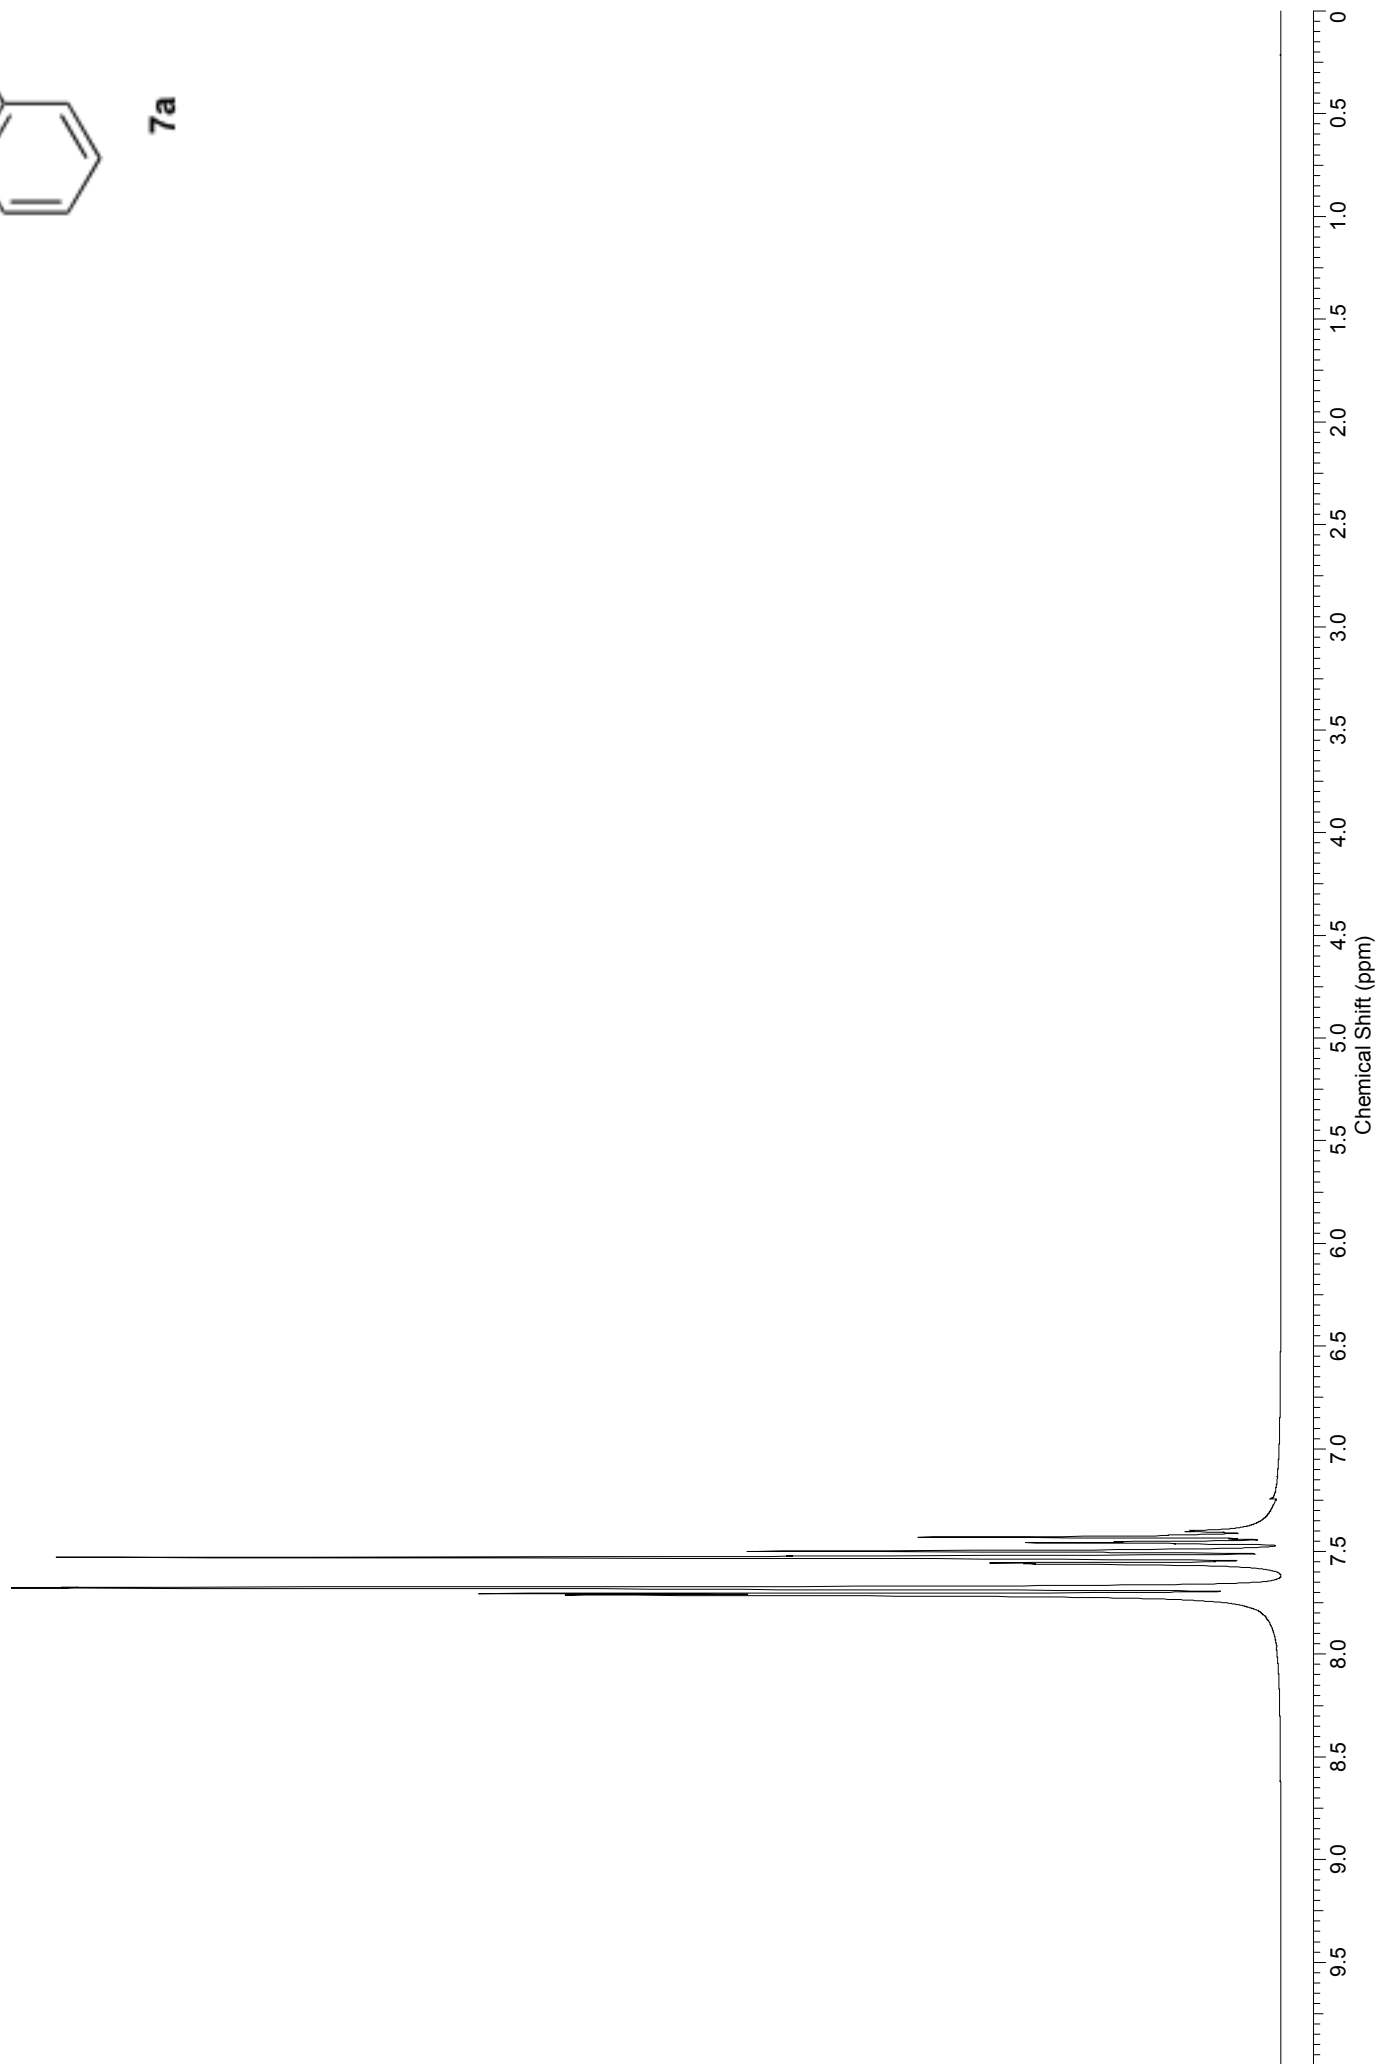

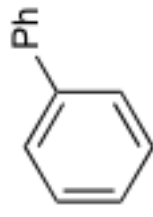

**7a**

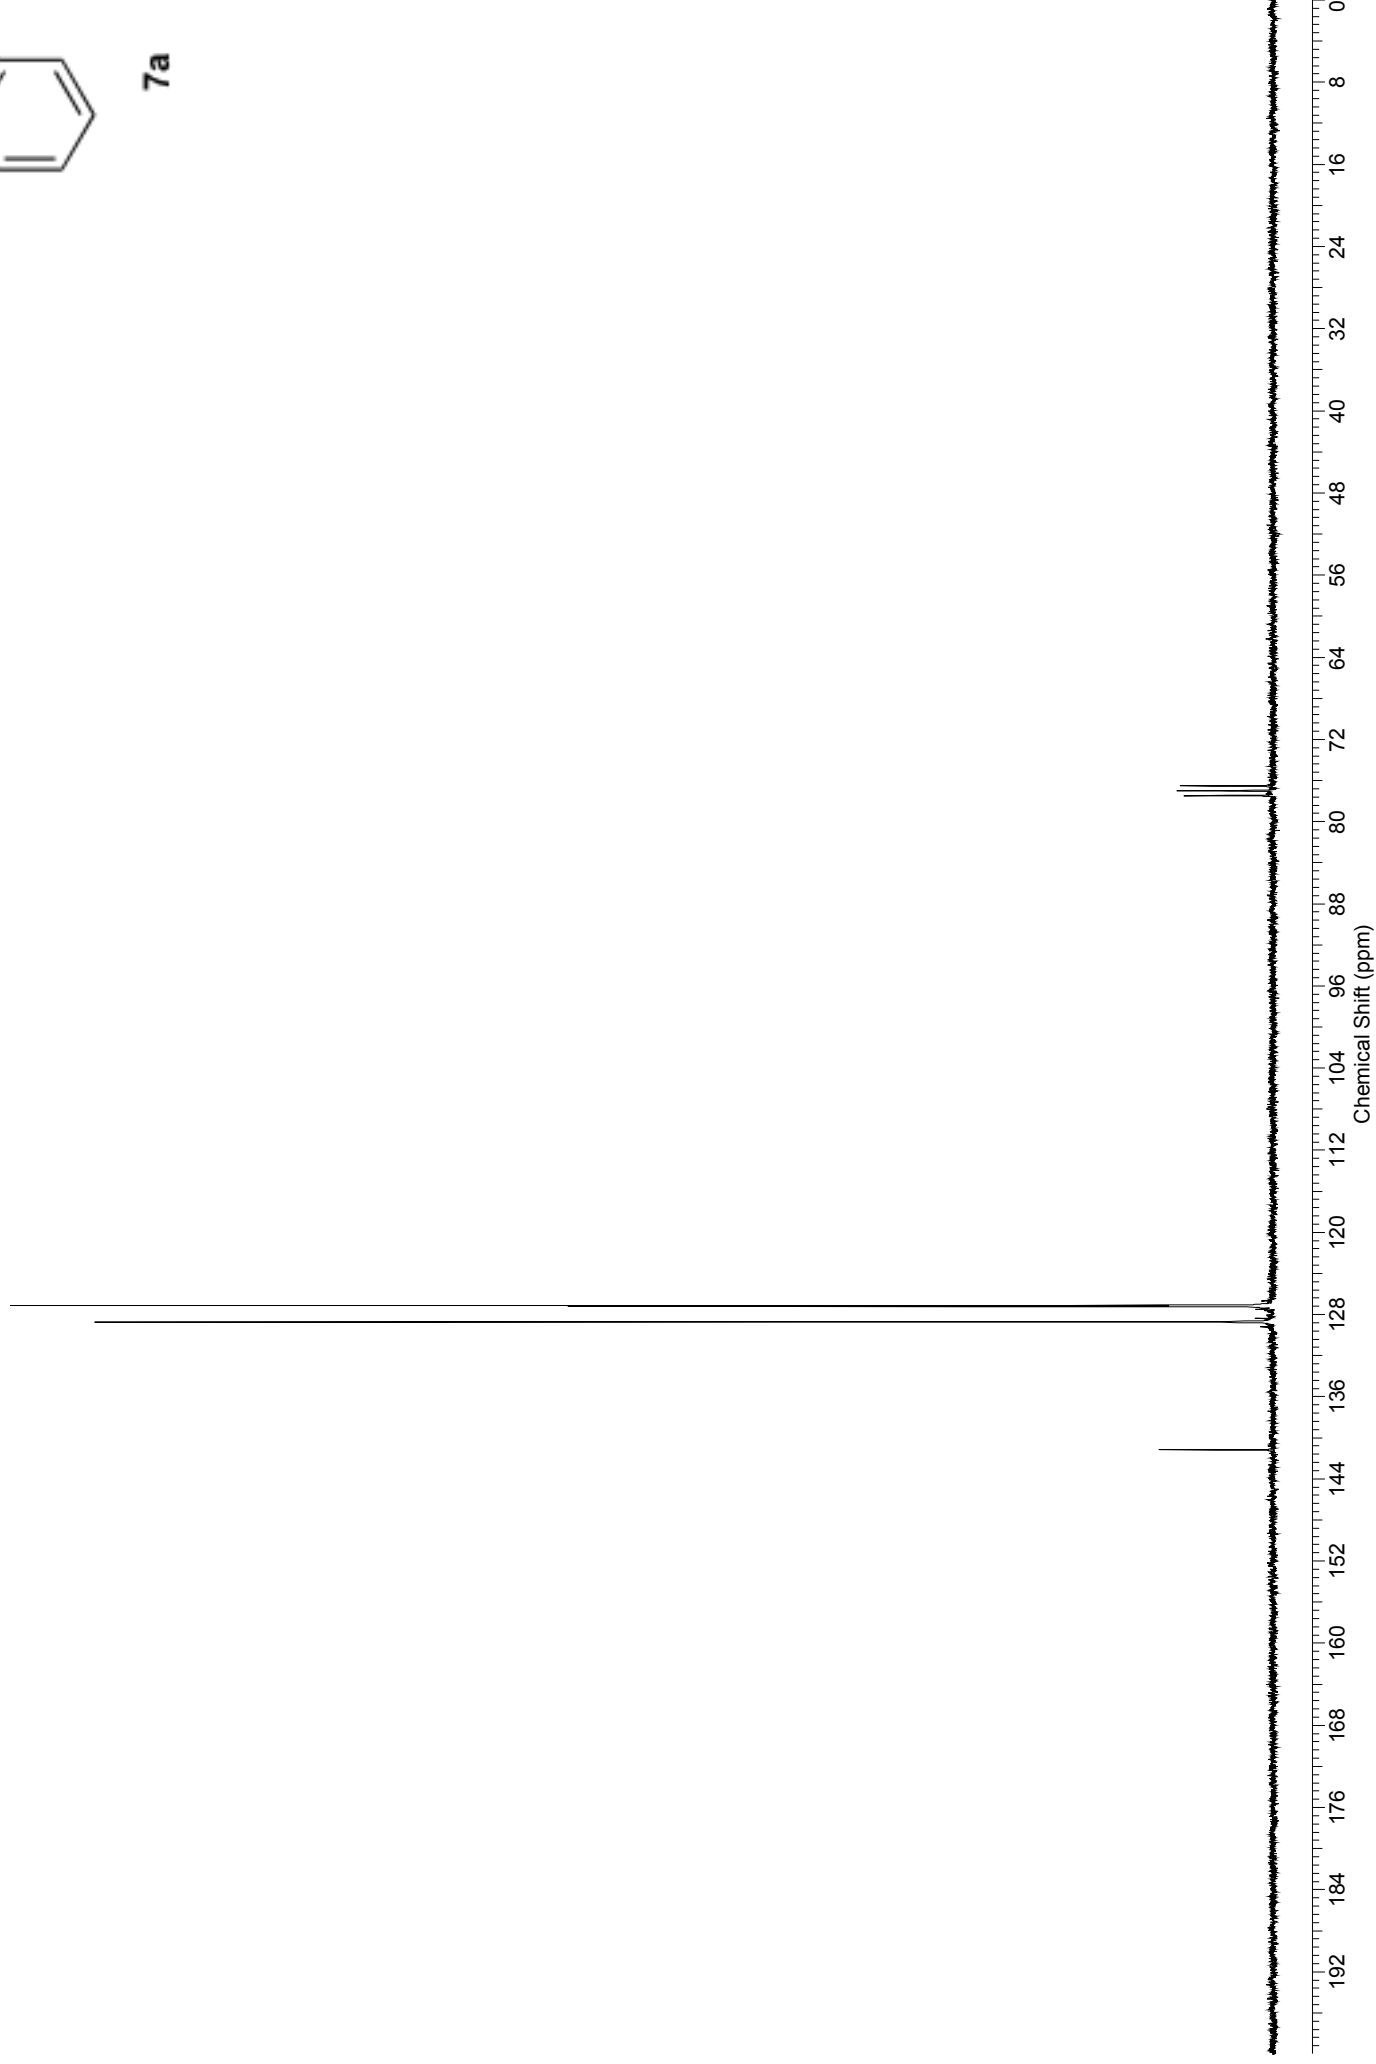

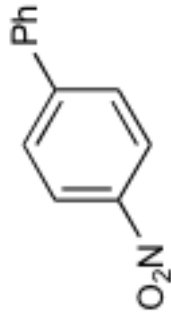

**7b**

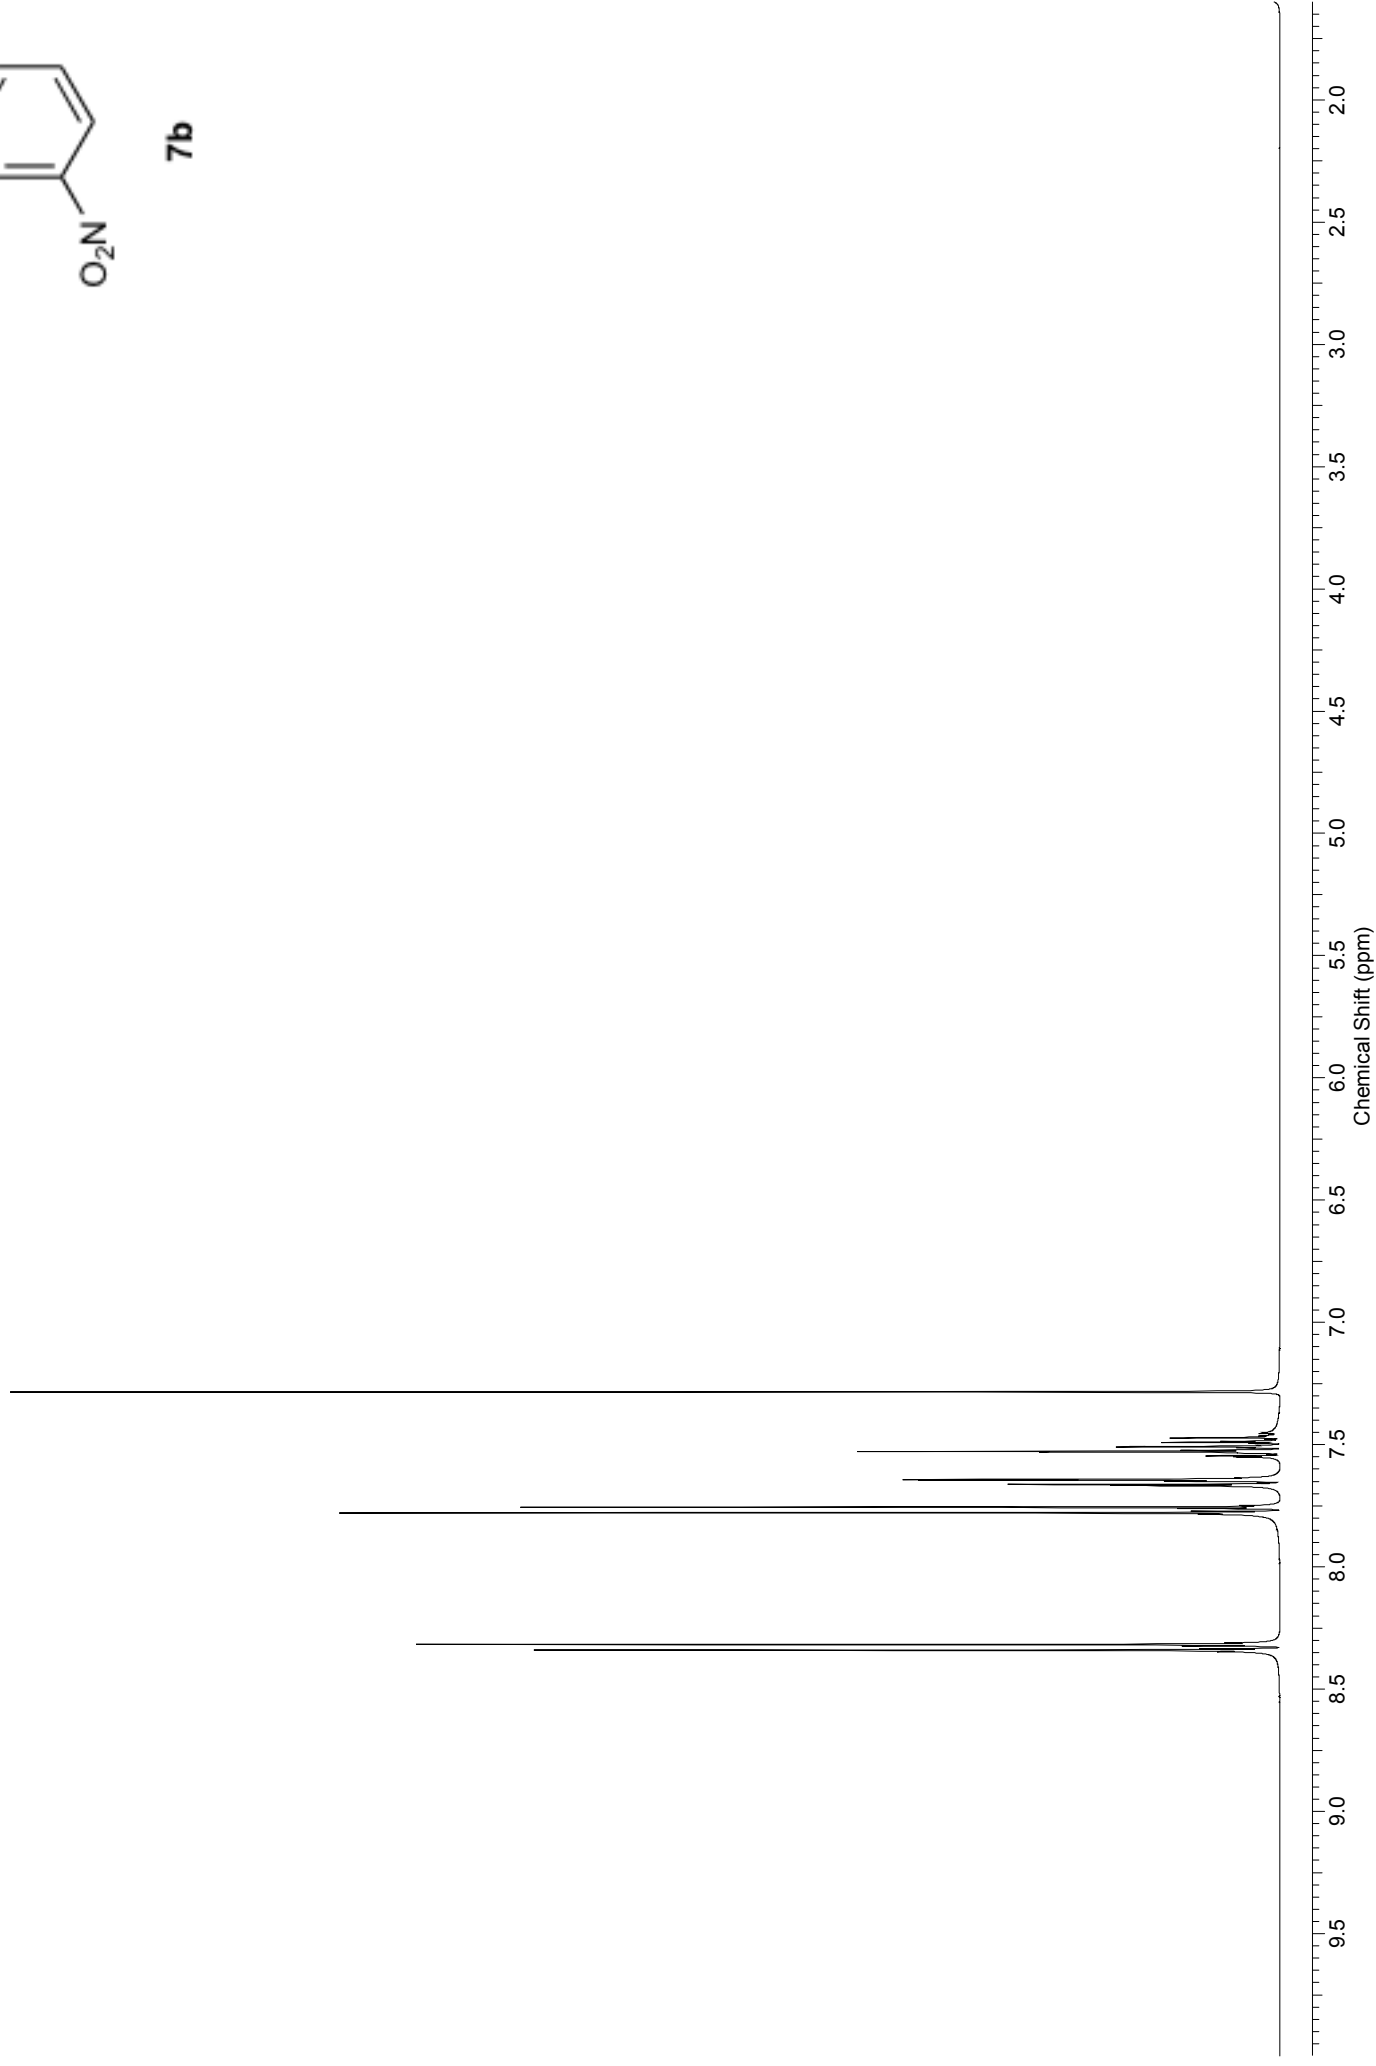

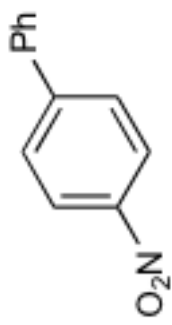

7b

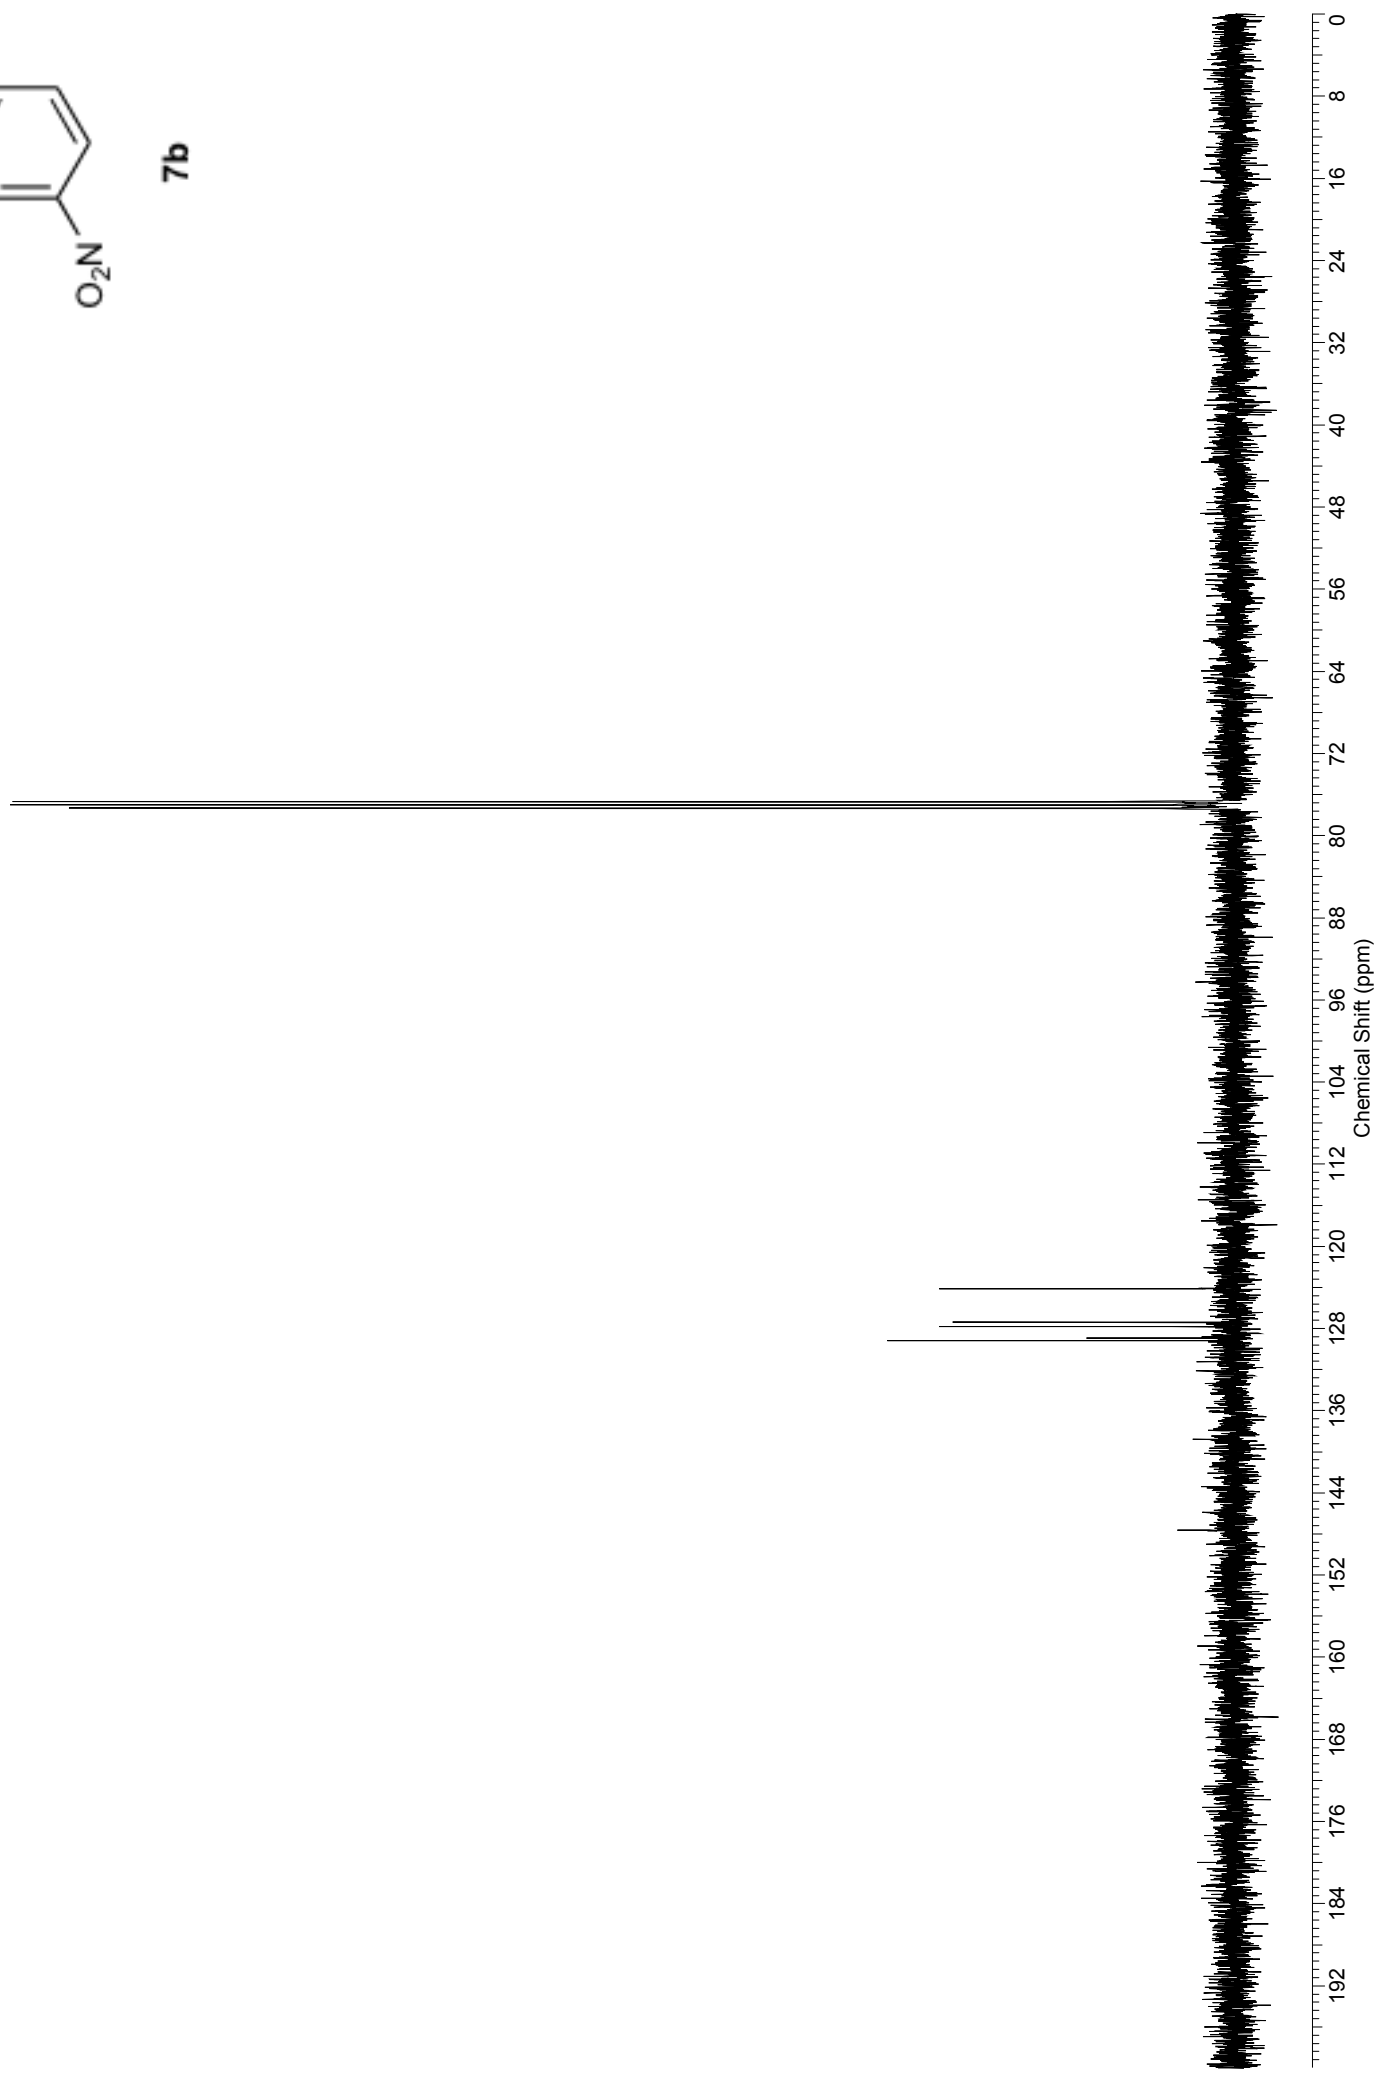

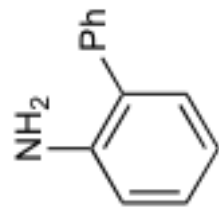

**7c**

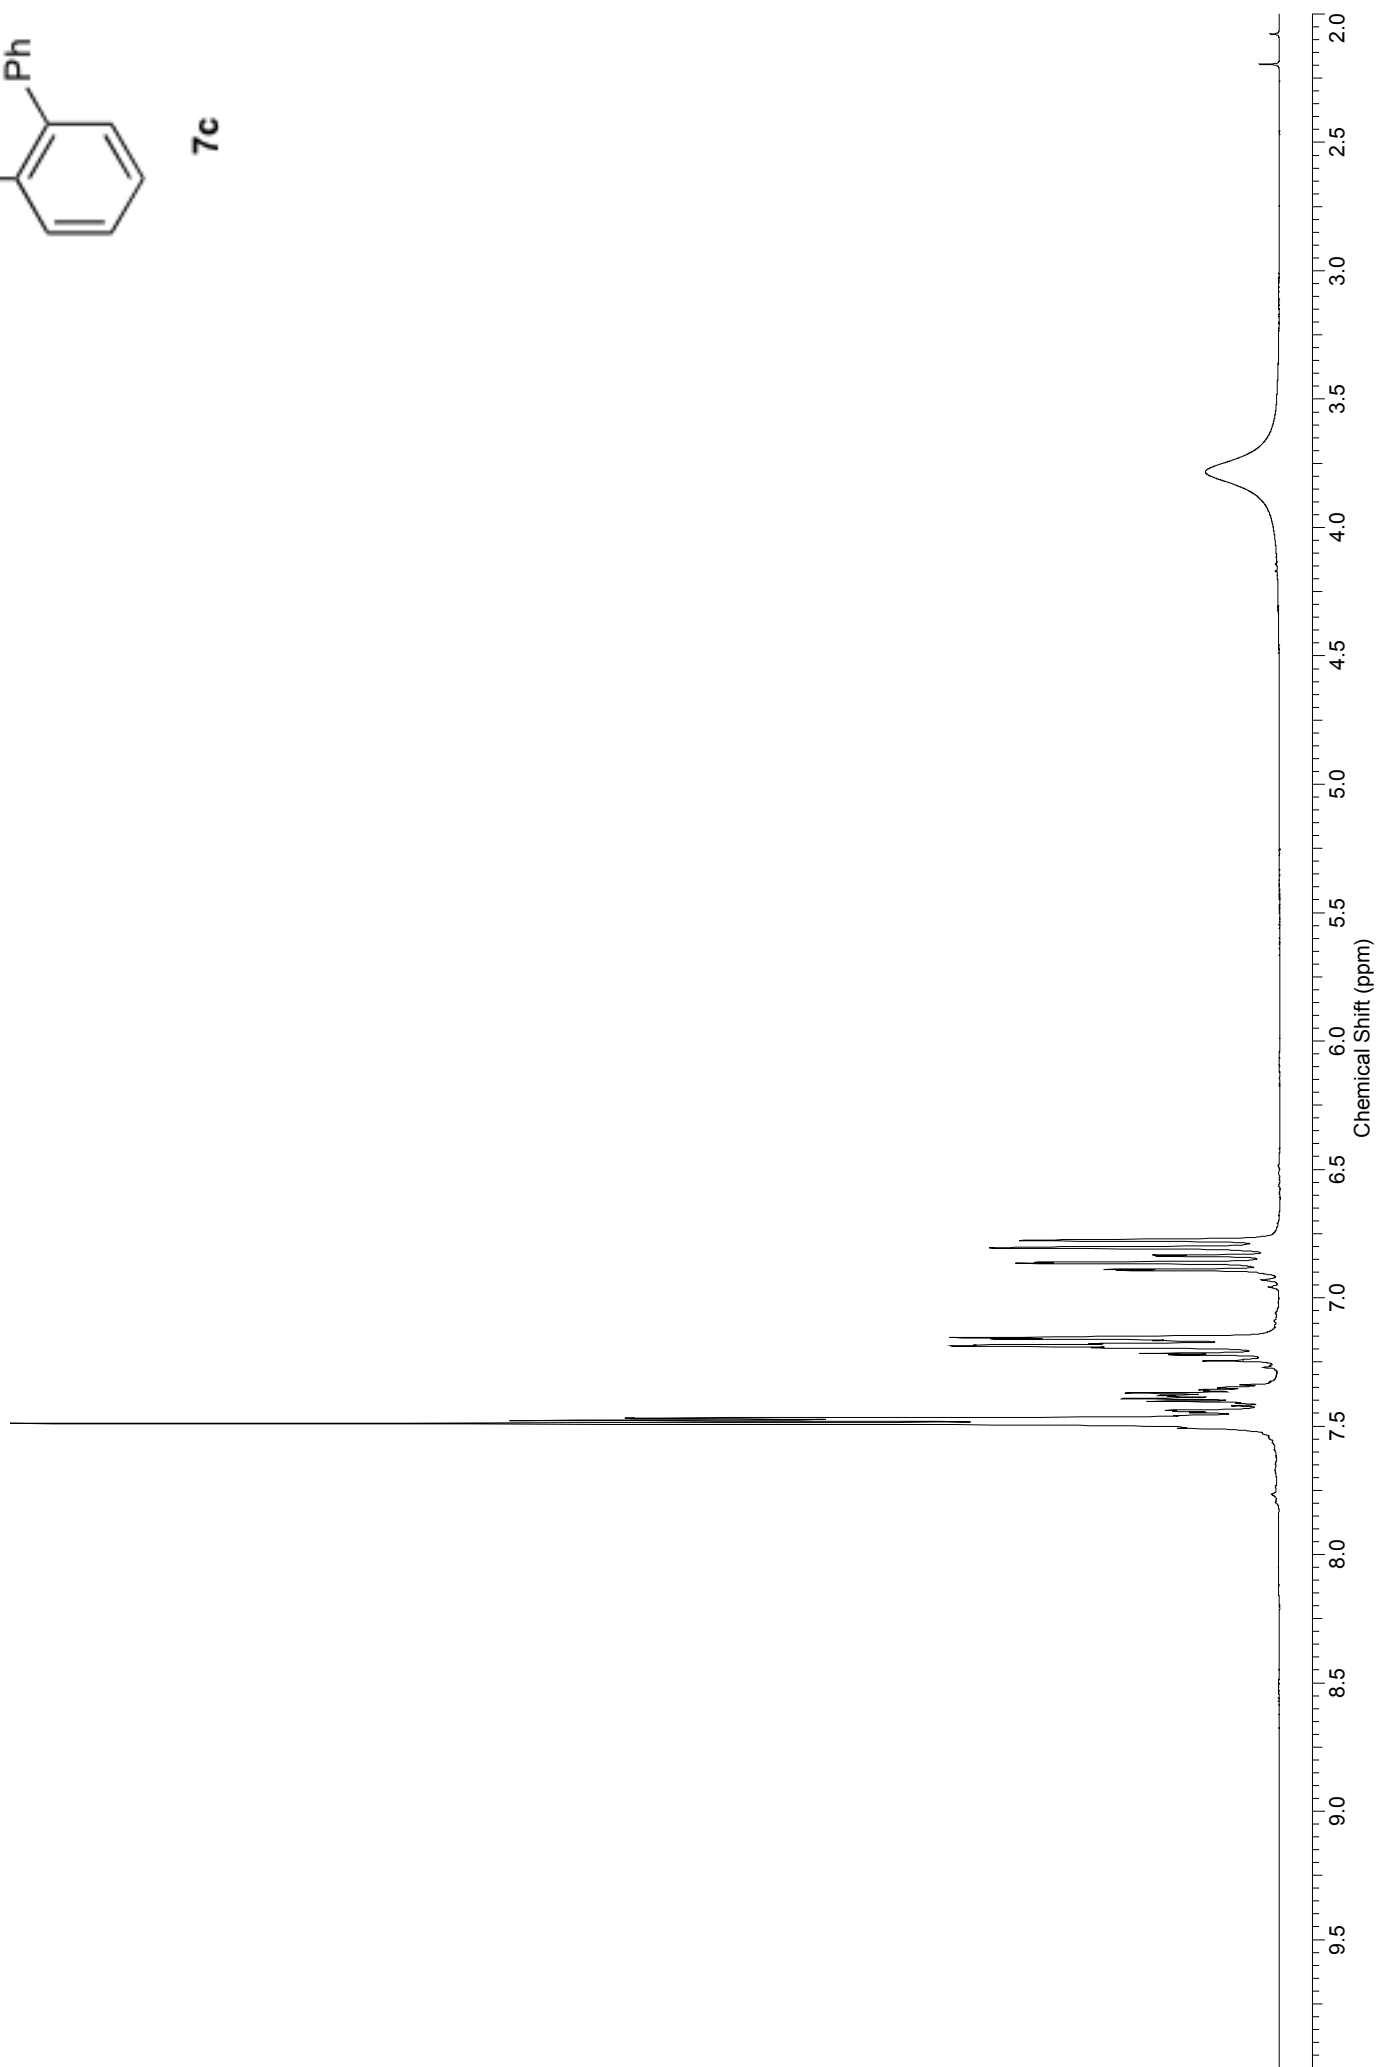

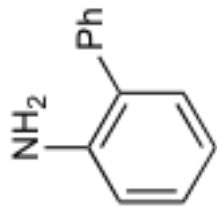

**7c**

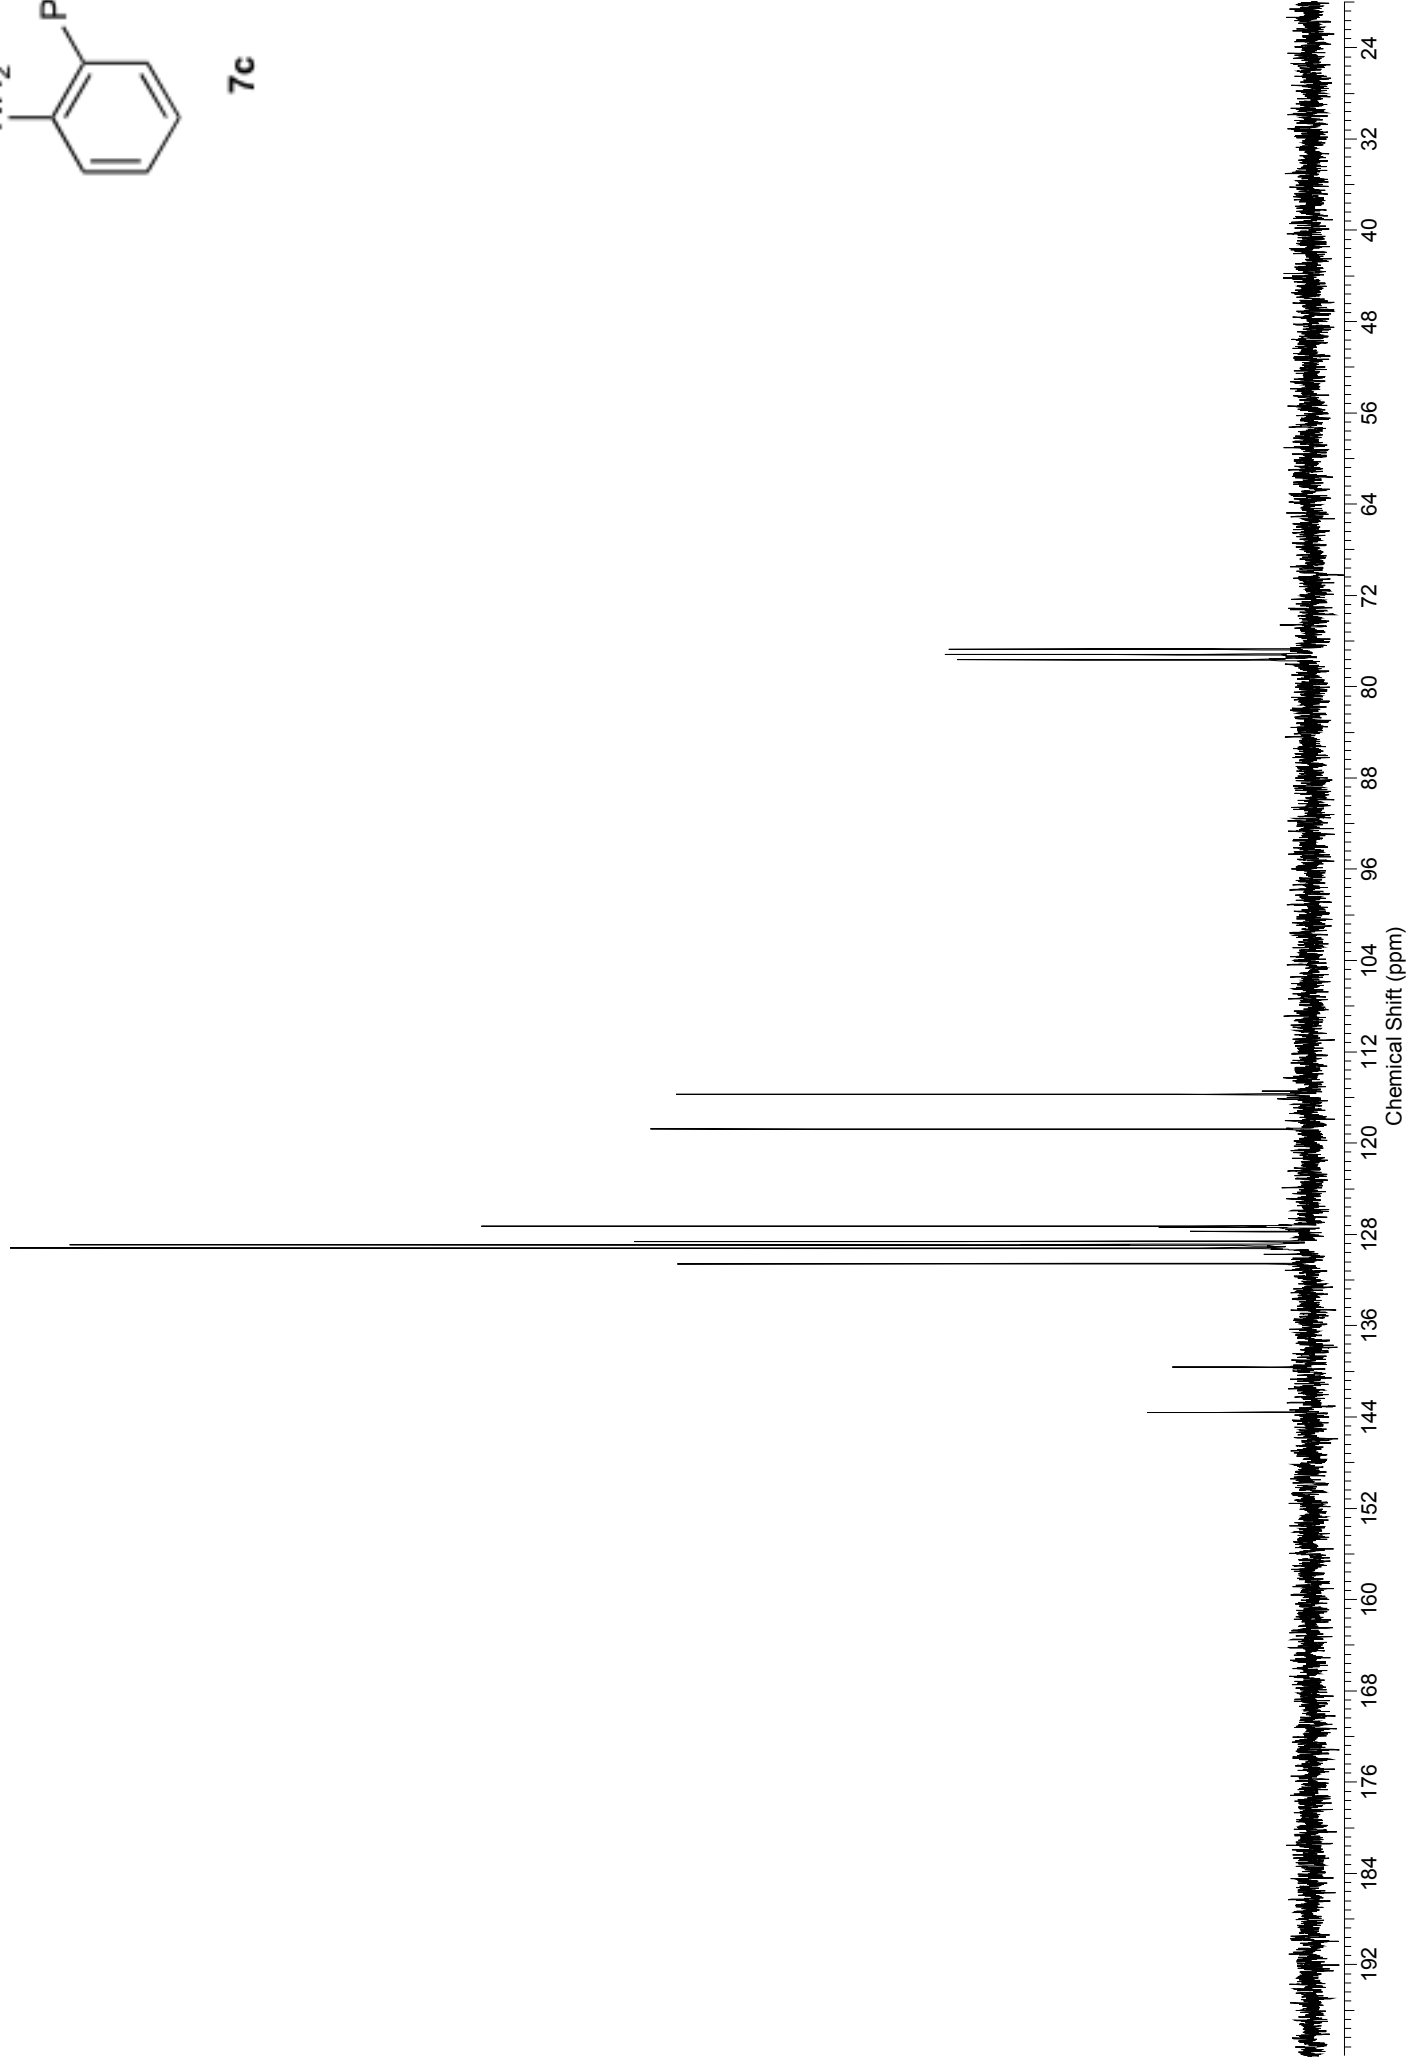

(52) final

52\_pure\_PROTON-2.jdf

52

1.1326

335.95M

247.541M

24.64M

7.446  
7.432  
7.195  
7.138  
7.110  
6.860  
6.856  
6.805

3.752

1.298

X : parts per Million : 1H

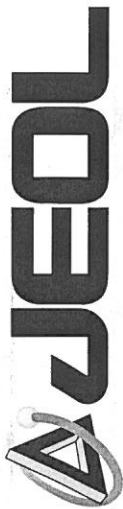

Filename = 52\_pure\_PROTON-2.jdf  
Author = delta  
Experiment = single\_pulse.exp  
Sample\_id = jcamp/r\_smi/52\_pure  
Solvent = CHLOROFORM-D  
Creation\_time = 24-FEB-2012 15:06:01  
Revision\_time = 24-FEB-2012 15:01:28  
Current\_time = 24-FEB-2012 15:01:28  
Content = 52  
Data\_format = 1D COMPLEX  
Dim\_size = 29491  
Dim\_title = 1H  
Dim\_units = [ppm]  
Dimensions = X  
Site = EX 270  
Spectrometer = DELTA\_NMR  
Field\_strength = 6.345446[T] (270[MHz])  
X\_acq\_duration = 3.6306944[s]  
X\_domain = 1H  
X\_freq = 270.16608844[MHz]  
X\_offset = 5[ppm]  
X\_points = 16384  
X\_prescans = 0  
X\_resolution = 0.27542941[Hz]  
X\_sweep = 4.51263538[KHz]  
Clipped = FALSE  
Mod\_return = 1  
Scans = 16  
Total\_scans = 16  
X\_90\_width = 9.8[us]  
X\_acq\_time = 3.6306944[s]  
X\_angle = 45[deg]  
X\_pulse = 4.9[us]  
Initial\_wait = 1[us]  
Phase\_preset = 3[us]  
Recvr\_gain = 19  
Relaxation\_delay = 1[us]  
Temp\_get = 21.1[dc]  
Unblank\_time = 2[us]

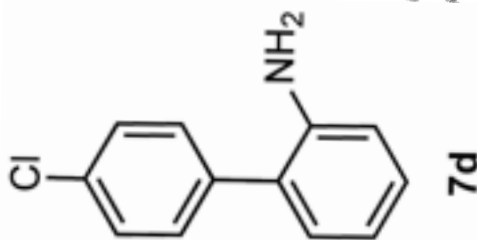

52 anal

52\_pure CARBON-2.jdf  
52

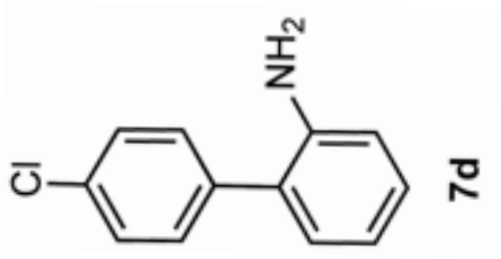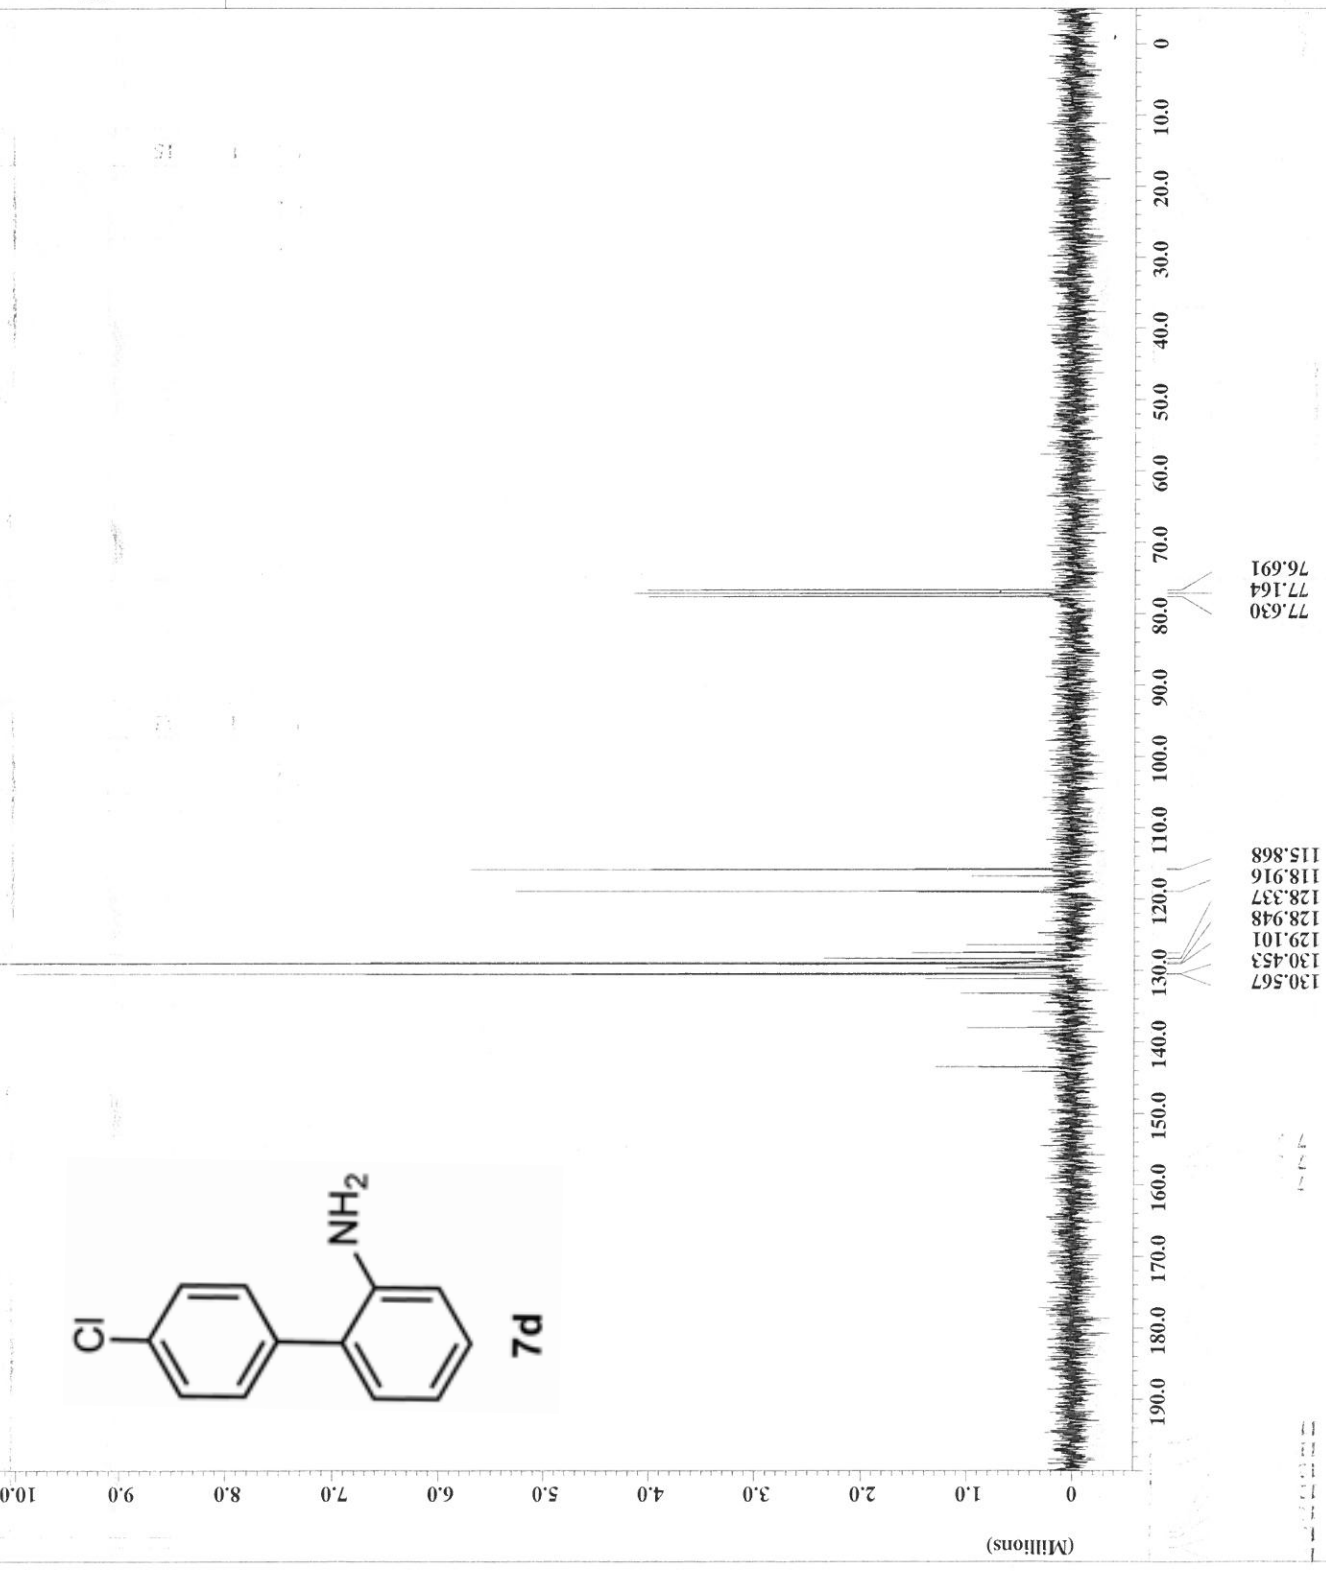

X : parts per Million : 13C

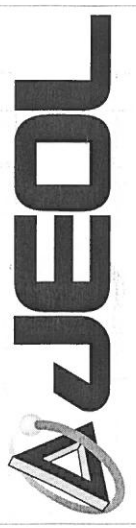

Filename = 52\_pure CARBON-2.jdf  
Author = delta  
Experiment = single\_pulse\_dec  
Sample\_id = jcamp/r\_smi/52\_pure  
Solvent = CHLOROFORM-D  
Creation\_time = 24-FEB-2012 15:11:00  
Revision\_time = 24-FEB-2012 15:06:26  
Current\_time = 24-FEB-2012 15:06:26  
Content = 52  
Data\_format = 1D COMPLEX  
Dim\_size = 32768  
Dim\_title = 13C  
Dim\_units = [ppm]  
Dimensions = X  
Site = EX 270  
Spectrometer = DELTA\_NMR  
Field\_strength = 6.345446[T] (270[MHz])  
X\_acq\_duration = 0.9633792[s]  
X\_domain = 13C  
X\_freq = 67.93330993[MHz]  
X\_offset = 100[ppm]  
X\_points = 16384  
X\_prescans = 0  
X\_resolution = 1.03801286[Hz]  
X\_sweep = 17.00680272[kHz]  
Irr\_domain = 1H  
Irr\_freq = 270.16608844[MHz]  
Irr\_offset = 5[ppm]  
Clipped = FALSE  
Mod\_return = 4  
Scans = 128  
Total\_scans = 128  
X\_90\_width = 10[us]  
X\_acq\_time = 0.9633792[s]  
X\_angle = 45[deg]  
X\_pulse = 5[us]  
Initial\_wait = 1[s]  
Phase\_preset = 3[us]  
Recvr\_gain = 30  
Relaxation\_delay = 1[s]  
Temp\_get = 21.9[degC]  
Unblank\_time = 2[us]

|                                                                                 |                    |
|---------------------------------------------------------------------------------|--------------------|
| <b>Formula</b> C <sub>18</sub> H <sub>12</sub> Cl <sub>2</sub> N <sub>2</sub> O | <b>FW</b> 343.2067 |
|---------------------------------------------------------------------------------|--------------------|

|                                                                           |                                                                                                 |
|---------------------------------------------------------------------------|-------------------------------------------------------------------------------------------------|
| <b>Acquisition Time (sec)</b> 5.3084                                      | <b>Comment</b> Slot No. 40 Sample ID rob88f SupervisorID jcamp Lab Phone No. 14190 UserID s_ngw |
| <b>Date</b> 27 Apr 2012 13:46:08                                          | <b>Date Stamp</b> 27 Apr 2012 13:46:08                                                          |
| <b>File Name</b> \\brukdpx300\nmr_data\s_ngw\nmr\s_ngw.rob88f\1\data\111r | <b>Frequency (MHz)</b> 300.13                                                                   |
| <b>Number of Transients</b> 16                                            | <b>Original Points Count</b> 32768                                                              |
| <b>Points Count</b> 65536                                                 | <b>Receiver Gain</b> 64.00                                                                      |
| <b>Solvent</b> CHLOROFORM-d                                               | <b>Spectrum Type</b> STANDARD                                                                   |
| <b>Temperature (degree C)</b> 25.000                                      | <b>Sweep Width (Hz)</b> 6172.75                                                                 |
|                                                                           | <b>SW(cyclical) (Hz)</b> 6172.84                                                                |
|                                                                           | <b>Owner</b> nmruiser                                                                           |
|                                                                           | <b>Nucleus</b> 1H                                                                               |

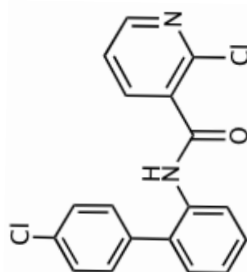

Boscalid (8)

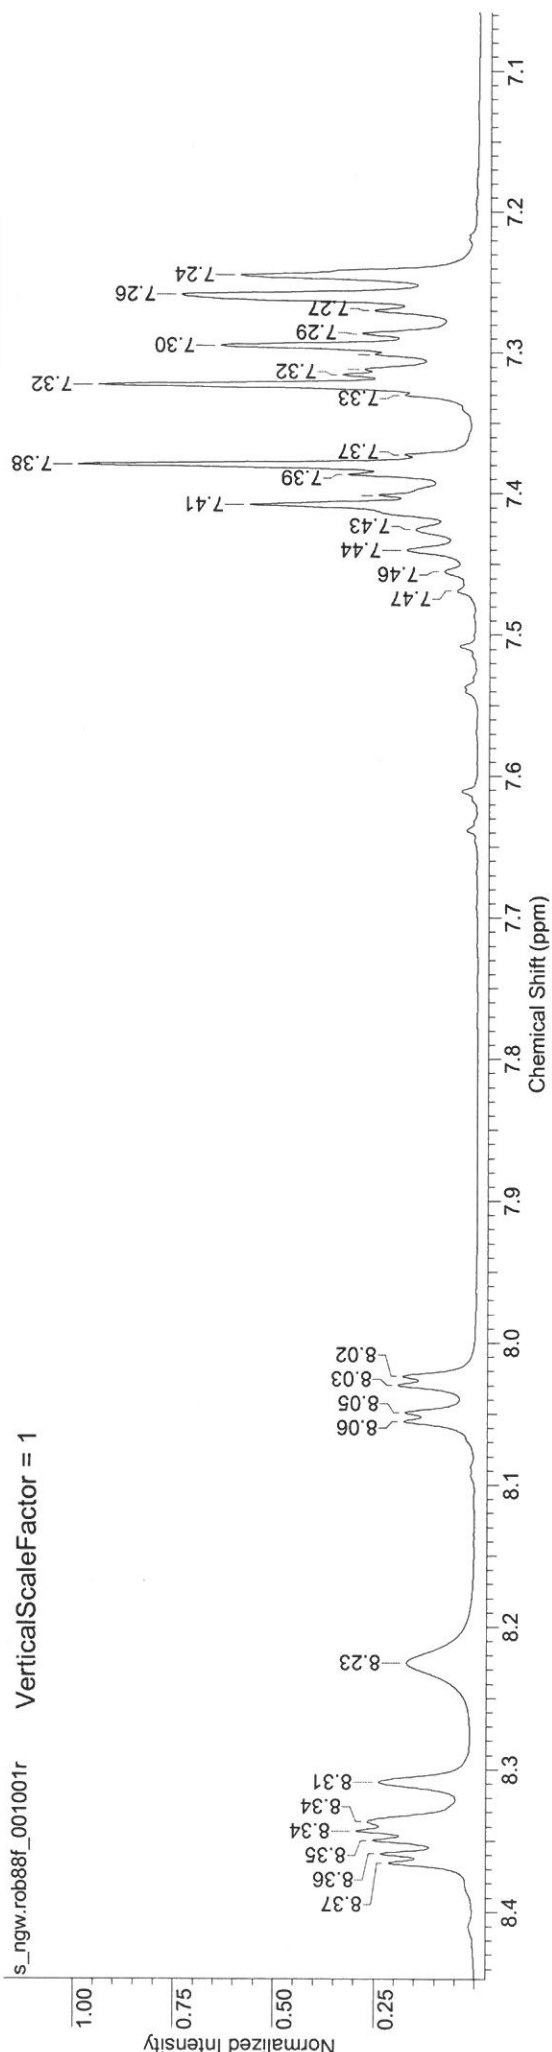

| Acquisition Time (sec) | 0.8700                                                     | Comment               | Slot No. 40 | Sample ID | rob88f | SupervisorID | jcamp | Lab Phone No. | 14190 | UserID | s_ngw |
|------------------------|------------------------------------------------------------|-----------------------|-------------|-----------|--------|--------------|-------|---------------|-------|--------|-------|
| Date                   | 27 Apr 2012 13:52:32                                       |                       |             |           |        |              |       |               |       |        |       |
| File Name              | \\brukdpx300\nmr_data\ls_ngw\nmr\ls_ngw.rob88f2\pdata\111r |                       |             |           |        |              |       |               |       |        |       |
| Number of Transients   | 128                                                        | Origin                | dpx300      |           |        |              |       |               |       |        |       |
| Points Count           | 32768                                                      | Pulse Sequence        | zgpg30      |           |        |              |       |               |       |        |       |
| Solvent                | CHLOROFORM-d                                               | Spectrum Offset (Hz)  | 8259.0322   |           |        |              |       |               |       |        |       |
| Temperature (degree C) | 25.000                                                     | Spectrum Type         | STANDARD    |           |        |              |       |               |       |        |       |
|                        |                                                            | Frequency (MHz)       | 75.47       |           |        |              |       |               |       |        |       |
|                        |                                                            | Original Points Count | 16384       |           |        |              |       |               |       |        |       |
|                        |                                                            | Receiver Gain         | 1448.20     |           |        |              |       |               |       |        |       |
|                        |                                                            | SW(cyclical) (Hz)     | 18832.39    |           |        |              |       |               |       |        |       |
|                        |                                                            | Sweep Width (Hz)      | 18831.82    |           |        |              |       |               |       |        |       |

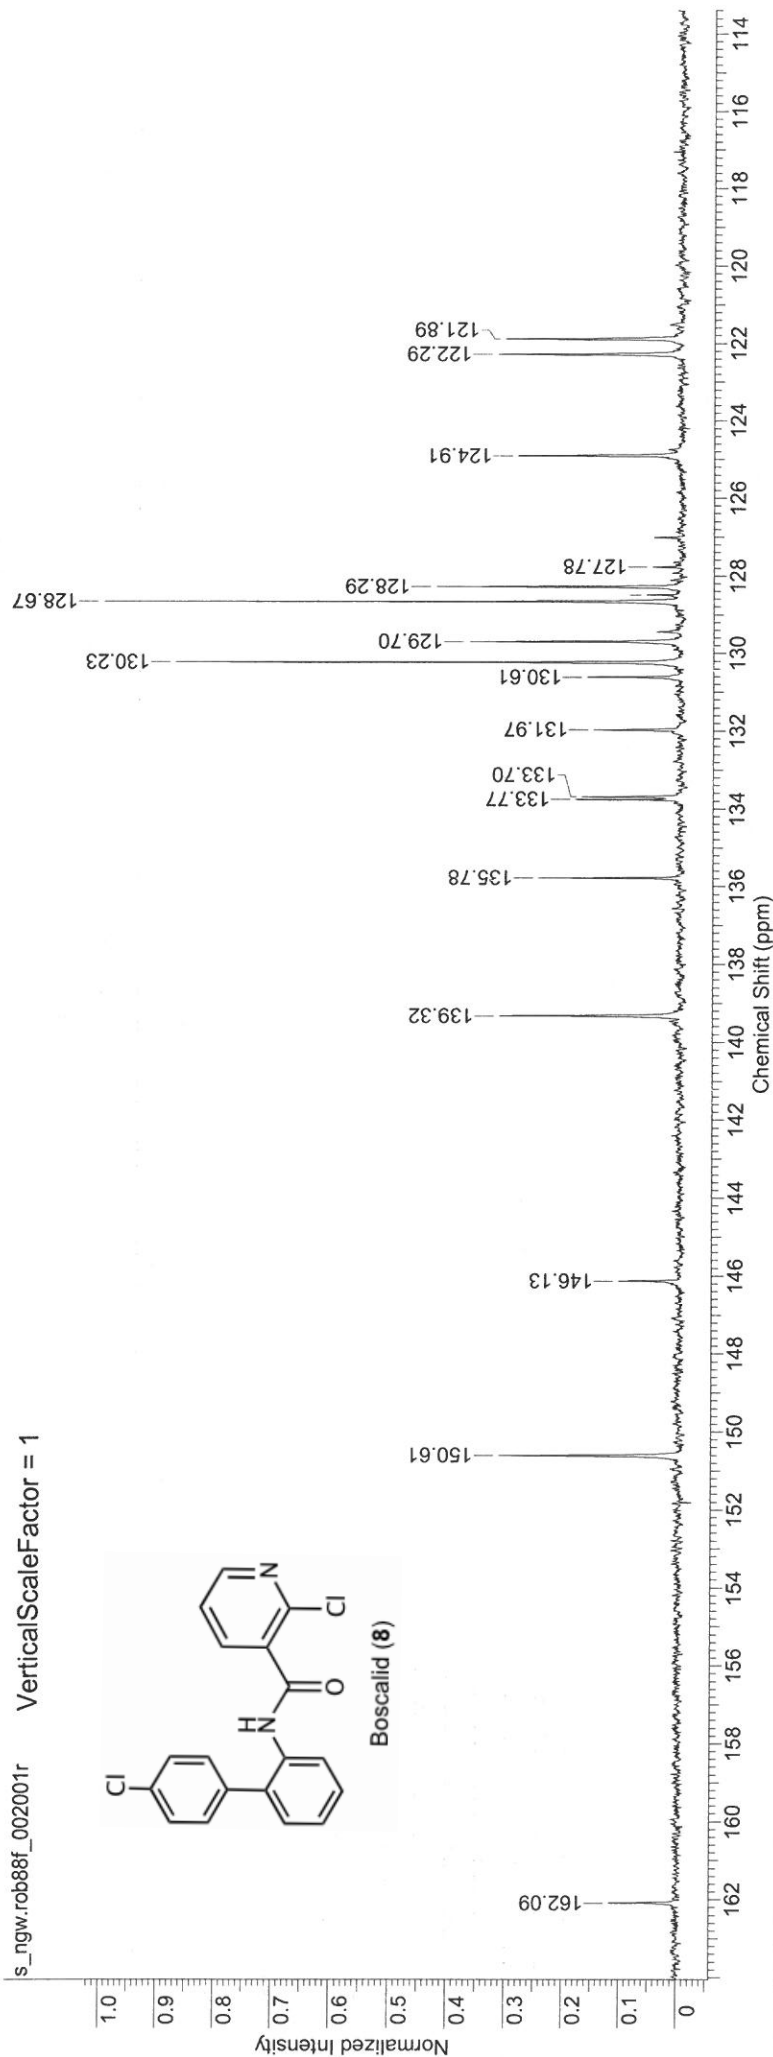

| No. | (ppm)  | (Hz)   | Height |
|-----|--------|--------|--------|
| 1   | 121.89 | 9198.4 | 0.3073 |
| 2   | 122.29 | 9228.9 | 0.3203 |
| 3   | 124.91 | 9426.6 | 0.2856 |
| 4   | 127.78 | 9643.2 | 0.0502 |
| 5   | 128.29 | 9681.7 | 0.4256 |
| 6   | 128.50 | 9697.3 | 0.0598 |
| 7   | 128.67 | 9710.5 | 1.0000 |
| 8   | 129.70 | 9788.1 | 0.3685 |
| 9   | 130.23 | 9828.3 | 0.8752 |
| 10  | 130.61 | 9857.0 | 0.1630 |
| 11  | 131.97 | 9959.3 | 0.1522 |
